# Supplementary material for: Cost of primary care approaches for hypertension management and risk-based cardiovascular disease prevention in Bangladesh: a HEARTS costing tool application
Source: PubMed Central journal article supplement — BMJ Open. 2022 Jun 27;12(6):e061467. doi: 10.1136/bmjopen-2022-061467 (PMC9237880; doi:10.1136/bmjopen-2022-061467), 2022-06-27
Supplement: bmjopen-2022-061467.draft_revisions.pdf [file bmjopen-2022-061467.draft_revisions.pdf]

# BMJ Open

BMJ Open is committed to open peer review. As part of this commitment we make the peer review history of every article we publish publicly available.

When an article is published we post the peer reviewers' comments and the authors' responses online. We also post the versions of the paper that were used during peer review. These are the versions that the peer review comments apply to.

The versions of the paper that follow are the versions that were submitted during the peer review process. They are not the versions of record or the final published versions. They should not be cited or distributed as the published version of this manuscript.

BMJ Open is an open access journal and the full, final, typeset and author-corrected version of record of the manuscript is available on our site with no access controls, subscription charges or pay-per-view fees (<http://bmjopen.bmj.com>).

If you have any questions on BMJ Open's open peer review process please email [info.bmjopen@bmj.com](mailto:info.bmjopen@bmj.com)

# BMJ Open

## Cost of primary care approaches for hypertension management and risk-based cardiovascular disease prevention in Bangladesh

|                               |                                                                                                                                                                                                                                                                                                                                                                                                                                                                                                                                                                                                                                                                                                                                                                                                                                                                                                                                           |
|-------------------------------|-------------------------------------------------------------------------------------------------------------------------------------------------------------------------------------------------------------------------------------------------------------------------------------------------------------------------------------------------------------------------------------------------------------------------------------------------------------------------------------------------------------------------------------------------------------------------------------------------------------------------------------------------------------------------------------------------------------------------------------------------------------------------------------------------------------------------------------------------------------------------------------------------------------------------------------------|
| Journal:                      | <i>BMJ Open</i>                                                                                                                                                                                                                                                                                                                                                                                                                                                                                                                                                                                                                                                                                                                                                                                                                                                                                                                           |
| Manuscript ID                 | bmjopen-2022-061467                                                                                                                                                                                                                                                                                                                                                                                                                                                                                                                                                                                                                                                                                                                                                                                                                                                                                                                       |
| Article Type:                 | Original research                                                                                                                                                                                                                                                                                                                                                                                                                                                                                                                                                                                                                                                                                                                                                                                                                                                                                                                         |
| Date Submitted by the Author: | 27-Jan-2022                                                                                                                                                                                                                                                                                                                                                                                                                                                                                                                                                                                                                                                                                                                                                                                                                                                                                                                               |
| Complete List of Authors:     | Husain, Muhammad ; Centers for Disease Control and Prevention, Division of Global Health Protection, Centers for Global Health Haider, Mohammad; Ministry of Health and Family Welfare, Directorate General of Health Services<br>Tarannum, Renesa; National Heart Foundation Hospital & Research Institute, Department of Epidemiology and Research<br>Jubayer, Shamim; National Heart Foundation Hospital & Research Institute, Department of Epidemiology and Research<br>Bhuiyan, Mahfuzur ; National Heart Foundation Hospital and Research Institute, Department of Epidemiology and Research<br>Kostova, Deliana; Centers for Disease Control and Prevention, Division of Global Health Protection, Centers for Global Health<br>Moran, Andrew ; Resolve to Save Lives, an initiative of Vital Strategies<br>Choudhury, Sohel Reza; National Heart Foundation Hospital & Research Institute, Department of Epidemiology & Research |
| Keywords:                     | Hypertension < CARDIOLOGY, HEALTH ECONOMICS, International health services < HEALTH SERVICES ADMINISTRATION & MANAGEMENT, PUBLIC HEALTH                                                                                                                                                                                                                                                                                                                                                                                                                                                                                                                                                                                                                                                                                                                                                                                                   |
|                               |                                                                                                                                                                                                                                                                                                                                                                                                                                                                                                                                                                                                                                                                                                                                                                                                                                                                                                                                           |

SCHOLARONE™  
Manuscripts

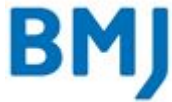

I, the Submitting Author has the right to grant and does grant on behalf of all authors of the Work (as defined in the below author licence), an exclusive licence and/or a non-exclusive licence for contributions from authors who are: i) UK Crown employees; ii) where BMJ has agreed a CC-BY licence shall apply, and/or iii) in accordance with the terms applicable for US Federal Government officers or employees acting as part of their official duties; on a worldwide, perpetual, irrevocable, royalty-free basis to BMJ Publishing Group Ltd ("BMJ") its licensees and where the relevant Journal is co-owned by BMJ to the co-owners of the Journal, to publish the Work in this journal and any other BMJ products and to exploit all rights, as set out in our [licence](#).

The Submitting Author accepts and understands that any supply made under these terms is made by BMJ to the Submitting Author unless you are acting as an employee on behalf of your employer or a postgraduate student of an affiliated institution which is paying any applicable article publishing charge ("APC") for Open Access articles. Where the Submitting Author wishes to make the Work available on an Open Access basis (and intends to pay the relevant APC), the terms of reuse of such Open Access shall be governed by a Creative Commons licence – details of these licences and which [Creative Commons](#) licence will apply to this Work are set out in our licence referred to above.

Other than as permitted in any relevant BMJ Author's Self Archiving Policies, I confirm this Work has not been accepted for publication elsewhere, is not being considered for publication elsewhere and does not duplicate material already published. I confirm all authors consent to publication of this Work and authorise the granting of this licence.

## Cost of primary care approaches for hypertension management and risk-based cardiovascular disease prevention in Bangladesh

Muhammad Jami Husain<sup>1\*</sup>, Mohammad Sabbir Haider<sup>2</sup>, Renesa Tarannum<sup>3</sup>, Shamim Jubayer<sup>3</sup>, Mahfuzur Rahman Bhuiyan<sup>3</sup>, Deliana Kostova<sup>1</sup>, Andrew E. Moran<sup>4</sup>, Sohel Reza Choudhury<sup>3</sup>

<sup>1</sup> Division of Global Health Protection, Centers for Global Health, Centers for Disease Control and Prevention, Atlanta, USA

<sup>2</sup> Directorate General of Health Services, Ministry of Health and Family Welfare, Dhaka, Bangladesh

<sup>3</sup> Department of Epidemiology and Research, National Heart Foundation Hospital & Research Institute, Dhaka, Bangladesh

<sup>4</sup> Resolve to Save Lives, an initiative of Vital Strategies, New York, USA.

\* Corresponding author: Muhammad Jami Husain, PhD. Email: [mhusain@cdc.gov](mailto:mhusain@cdc.gov)

### Abstract

**Objective:** To estimate the costs of scaling up the HEARTS pilot project for hypertension management and risk-based cardiovascular disease prevention at the full population level in the four sub-districts (upazilas) in Bangladesh.

**Settings:** Two intervention scenarios in sub-district health complexes: hypertension management only, and risk-based integrated hypertension, diabetes, and cholesterol management.

**Methods:** Program costs were assessed using the HEARTS costing tool, an Excel-based instrument to collect, track, and evaluate the incremental annual costs of implementing the HEARTS program from the health system perspective.

**Data:** Data were obtained in July-August 2020 from sub-district health complexes on the cost of medications, diagnostic materials, staff salaries, and other program components.

**Results:** The total annual cost for the hypertension control program was estimated at USD 3.3 million, equivalent to USD 2.9 per capita or, USD 9.1 per eligible patient. The largest cost share (USD 1.35 million; 42%) was attributed to the cost of provider time to administer treatment, followed by the cost of medications (40%). The total annual cost of the risk-based integrated management program was projected at USD 15.7 million, entailing USD 14 per capita or USD 44 per eligible patient. The estimated annual costs per patient treated with medications for hypertension, diabetes, and cholesterol were USD 17, USD 34, and USD 48, respectively.

**Conclusion:** Expanding the HEARTS hypertension management and CVD prevention program to provide services to the entire eligible population in the catchment area may face constraints in physician capacity. A task-sharing model involving shifting of select tasks from doctors to nurses and local community health workers would be essential for the eventual scale-up of primary care services to prevent CVD in Bangladesh.

**Key Words:** Program cost; HEARTS hypertension management and CVD prevention program; scale-up of primary care services; Bangladesh.

**Word Count:** 3903

### Strengths and limitations of this study

- This is the first study that assesses the costs of scaling up two program scenarios at the full population level in the four sub-districts in Bangladesh: a hypertension management program and an integrated risk-based hypertension, diabetes, and cholesterol management program.
- Program costs were assessed using the HEARTS costing tool, an Excel-based instrument to collect, track, and evaluate the incremental annual costs of implementing the HEARTS program from the health system perspective.
- The strength of the study lies in its ability to disaggregate costs by function, identifying areas for efficiency improvements, such as task-sharing and bridging program delivery from the upazila level to more localized community facilities.
- Understanding the cost drivers of CVD prevention approaches in the Bangladesh primary care system can support budgeting, procurement, evaluation, cost-effectiveness analyses, and planning for scale-up, with the goal of increasing population outreach for CVD prevention.
- Due to lack of data at a local level, the cost projections rely on assumptions regarding population coverage, risk factor prevalence, primary care attendance rate, and frequency of patient visits by CDV risk.

## 1. BACKGROUND

Hypertension is a major and preventable risk factor for cardiovascular disease (CVD). An estimated 1.13 billion people (1 in 4 men and 1 in 5 women) worldwide has hypertension. Among people with hypertension worldwide, fewer than 1 in 5 have it under control.[1] High blood pressure is a leading global risk factor for premature death and disability, accounting for about 10 million (or 1 in 6) deaths worldwide each year.[2, 3] Uncontrolled hypertension significantly increases the risk of stroke, myocardial infarction, cardiac failure, dementia, renal failure, blindness, and other diseases.[4-7] Almost half of all CVD deaths are attributable to uncontrolled hypertension.[2, 3]

Reducing the prevalence of raised blood pressure is a standing global health objective.[8-11] This objective complements the 2030 Sustainable Development Goal (SDG) of reducing premature deaths from noncommunicable diseases (NCDs) by 25%.[12] Low- and middle-income countries (LMICs), where two-thirds of global hypertension cases reside, are increasingly cognizant of the long-term benefits of addressing hypertension in their populations. However, implementing population-level measures targeting hypertension may present challenges for many LMICs where health systems have traditionally focused on infectious diseases and where the capacity for NCD care may be limited.

Bangladesh is among lower-middle-income countries with a high burden of hypertension. In 2018, the prevalence of elevated blood pressure (SBP and/or DBP  $\geq$  140/90 mmHg) among adults in Bangladesh was 21%.[13-15]. According to the 2011 Bangladesh National Demographic and Health Survey, of 14.4 million hypertensive people, only 7.3 million (51%) were aware of their condition, 41% were treated, and 18% had their blood pressure levels under control.[16] The burden of hypertension in Bangladesh is expected to grow alongside increased population aging, rapid urbanization with commensurate increases in sedentary lifestyle and processed food consumption, and other socio-economic and lifestyle changes. However, only a less than 5 percent of the health sector program budget is allocated for NCDs control.[17] This demonstrates the need for population-level approaches to addressing hypertension that are effective, low-cost, and efficient.

In 2016, WHO introduced the HEARTS technical package as a framework for CVD prevention at the primary care level.[18] The HEARTS technical package consists of guidelines for implementing a primary-care approach to CVD management, focusing on screening and management of CVD risk factors, including lifestyle modification and pharmaceutical treatment of metabolic risk factors such as hypertension, diabetes, and hyperlipidemia. In this paper, we describe the local budgetary impact of implementing the HEARTS program at the population level for four sub-districts in Bangladesh, based on program cost data obtained from a representative health care facility in each sub-district. Although the initial focus of the program in the four sub-districts is presently limited to hypertension control, scaling-up of the initiative may include screening, diagnosis, and treatment of diabetes and high cholesterol. Understanding the cost drivers of CVD prevention approaches in the Bangladesh primary care system can support budgeting, procurement, evaluation, and planning for scale-up.

## 2. METHODS

### 2.1. Setting

In 2018, the Directorate General of Health Services and the National Heart Foundation of Bangladesh collaborated with Resolve to Save Lives (RTSL, an initiative of Vital Strategies, a non-profit global public health organization) to implement a pilot program to strengthen the detection, treatment, and follow-up management of hypertension in primary care. The program was introduced in four health complexes in four sub-districts (upazilas) in the Sylhet district: Golapganj, Fenchuganj, Beanibazar, and Bishwanath. In Bangladesh, hospitals and health facilities that are in the sub-district (upazila) level or below are termed as primary health complexes. A typical upazila health complex is a 50-bed hospital with service coverage in the range of 100,000 to 400,000 population and plays a pivotal role in the provision of primary health care. The upazila health complex has a wide range of functions that include preventive, promotive, curative (in-patient, out-patient, limited diagnostic services), management, technical support, training, coordination, and patient referral services. We project program costs under two intervention scenarios: a hypertension-focused program, and a risk-based integrated hypertension, diabetes, and cholesterol management program.

### 2.2. Patient and Public Involvement

Patients or the public were not involved in the design, or conduct, or reporting, or dissemination plans of this research.

### 2.3. Hypertension management program

The HEARTS Technical Package for CVD prevention in primary care is organized around six modules: H—Healthy-lifestyle counselling, E—Evidence-based treatment protocols, A—Access to essential medicines and technology, R—Risk-based CVD management, T—Team-based Care, and S—Systems for monitoring.[19] Components of these modules are described in Figure 1. In the four upazila primary care complexes in Bangladesh, programmatic activities included: training of staff in following a standard treatment protocol, record keeping and reporting; ensuring adequate supply of necessary drugs; community outreach to increase awareness of the need for hypertension screening; introduction of patient monitoring tools and a monthly reporting system; and establishing a mechanism for patient referral from primary care to secondary care and tertiary care at MAG Osmani Medical College. The clinical management protocol for adults with hypertension entailed a first line of treatment with amlodipine 5mg daily; a second line of treatment using amlodipine 5mg plus losartan 50mg daily; and a third line of treatment using amlodipine 5mg plus losartan 50mg plus hydrochlorothiazide 12.5mg daily. The prescribed medicines are typically procured by public health facilities, generic, domestically manufactured, and provided free of charge to patients. The national drug policy recommends that 70% of the public sector medicines be purchased from the state-owned Essential Drug Company Limited (EDCL), 25% from the Central Medical Stores Depot (CMSD), and 5% from local sources.[20, 21] In order to provide continuous care more sustainably and to reduce burden on physicians, a team-based care strategy was implemented. In this approach, community

1  
2  
3 health workers (CHW) were trained to provide counselling and some screening services along with the  
4 doctors and nurses. For the costing estimate, equal burden sharing in terms of provider time was assumed.  
5

#### 6 7 *2.4. Risk-based integrated hypertension, diabetes, and hyperlipidemia management program*

8  
9 To further strengthen CVD prevention, the HEARTS program in Bangladesh also integrated diabetes  
10 and hyperlipidemia management in addition to hypertension management in primary care patients. The  
11 treatment protocol for patients with uncomplicated type 2 diabetes managed at the primary care level  
12 included Metformin (500 mg), Metformin (1000 mg), then Metformin (1000 mg), and Gliclazide (80 mg)  
13 as the first, second, and third lines of treatments, respectively. The treatment protocol for hyperlipidemia  
14 included simvastatin (10 mg) as first, atorvastatin (20 mg) as second, and atorvastatin (40 mg) as the third  
15 line of treatment. Costs associated with implementing integrated hypertension, diabetes, and  
16 hyperlipidemia treatment protocols include provider time spent on estimating CVD risk using risk charts  
17 during an annual primary care visit; training in CVD risk estimation, in addition to time spent collecting  
18 patient history; medication costs; and diagnostic test costs including provider (technician) time, complete  
19 blood count panel, fasting blood glucose, and blood lipid panel tests.  
20  
21  
22  
23

#### 24 25 *2.5. HEARTS Costing Tool*

26  
27 Program costs were assessed using the HEARTS costing tool, an Excel-based instrument to collect,  
28 track, and evaluate the incremental annual cost of implementing the HEARTS program from the health  
29 system perspective. The tool is organized by HEARTS modules.[22]. In July-August 2020, we obtained  
30 unit costs from four upazila complexes and used these to project annual resource needs for implementing  
31 the CVD prevention program at the sub-district population level. The researchers completed in-person  
32 collection of data from the four facilities on human resource and time costs, diagnostic prices, time-motion  
33 on laboratory diagnostics, market price of medicines, and others.  
34  
35  
36

37  
38 Figure 1 shows major cost categories within HEARTS modules. Once program costs and other inputs  
39 such as population coverage, risk factor prevalence, and planned provider numbers were entered into the  
40 costing tool, the cost calculations were allocated across different HEARTS modules.  
41

#### 42 **Figure 1: Cost components of the HEARTS program in Bangladesh**

43  
44  
45 The cost elements in the Healthy-lifestyle counselling module 'H' included costs of training  
46 providers in lifestyle counseling and costs of community awareness programs and training. Counselling is  
47 based on the '5 As' (Assess, Advise, Agree, Assist, Arrange) model, which is an evidence-based approach  
48 for promoting healthy behavioral changes to prevent NCD risk factors.[23, 24] Total provider time to  
49 administer brief counseling was equal to the average time that the health provider spends to counsel a  
50 patient to change behavior multiplied by the total number of patients who would receive counselling. The  
51 cost of total provider time was calculated as the total provider time, multiplied by the weighted average  
52 salary of the health providers who have been trained to provide counselling.  
53  
54  
55  
56  
57  
58  
59



1  
2  
3 The cost elements in Module 'E' included provider time devoted to assessing patient history,  
4 conducting physical exams and diagnostic tests, and return visits. The costs of diagnostic tests (complete  
5 blood count panel, blood lipid panel, fasting blood glucose), medications (hypertension, diabetes, and  
6 cholesterol), and on-site diagnostic technologies and supplies were assessed under Module 'A'. Module 'R'  
7 reports the costs of training providers in conducting risk-based management and the cost of provider time  
8 for estimating patient CVD risk using risk charts. Module "T" reports cost savings from task-sharing by  
9 comparing the cost that could have been incurred if the tasks were performed solely by the physicians with  
10 costs incurred through task-sharing among physicians, nurses, and CHW. Therefore, in the baseline  
11 scenario (i.e., in the absence of task-sharing allocation), the costing tool assumes a physician-led program.  
12 In our cost projections, we assumed that doctors, nurses, and CHWs will equally share the tasks (i.e.,  
13 provider time) where applicable. For instance, CHWs would only provide behavioral counselling and  
14 screening service, but they would not assess CVD risk (using risk-cart), or prescribe patients with  
15 pharmacologic treatments. Accordingly, the provider time allocated for behavior counselling and screening  
16 will be shared equally among doctors, nurses, and CHWs. Nurses will be trained to do major tasks (i.e.,  
17 counselling, screening, and assessing CVD risk, and treating according to CVD risk), therefore providers'  
18 time for performing HTN/CVD risk-assessment, prescribing suitable treatment, and return-visits were  
19 allocated equally between doctors and nurses. While the 'T' module reports the cost savings from team-  
20 based care, The accrued cost of provider time (inclusive of doctors, nurses, and CHWs) spent on various  
21 tasks is included in the corresponding 'H', 'E', and 'R' modules. Module 'S' reports costs related to human  
22 resources, technology (software and hardware), supplies, and training for patient monitoring.  
23  
24  
25  
26  
27  
28  
29  
30

### 31 2.6. Data

32  
33 Data on salaries of government healthcare providers and program staff were collected from in-person  
34 interviews and/or records. Total salary was calculated according to the Government of Bangladesh National  
35 pay scale. Size of the population in the examined sub-districts was obtained from census and imputed based  
36 on Bangladesh Bureau of Statistics (BBS) estimates. Other population parameters (e.g., primary care  
37 attendance rate and risk factor prevalence) were obtained from the nationally representative NCD Risk  
38 Factor Survey 2018.[15] Medicine prices were collected from the medicine outlets in the public hospitals.  
39 The unit prices represent the average price of domestically manufactured generic medicines procured by  
40 health facilities from EDCL or CMSD. Prices of laboratory diagnostics were collected from diagnostic labs  
41 at the district (Sylhet district) and sub-district (upazila) levels. Data on time needed to conduct laboratory  
42 tests were collected from in-person interviews of laboratory personnel. Training data, including number of  
43 training and participants, per-diem costs of staff, costs related to rent, transport, refreshments, and other  
44 logistics, were collected from the respective project records.  
45  
46  
47  
48  
49

50 Table 1 presents the prevalence of CVD risk factors as well as cost inputs used to populate the  
51 HEARTS costing tool. 15% of the adult population was estimated to be at high risk for CVD. The leading  
52 risk factors were tobacco use (43.7%), hyperlipidemia (28.4%) and hypertension (21%), followed by  
53 physical inactivity (12.3%), diabetes (8.3%) and alcohol consumption (4.4%).; The primary care attendance  
54 rate was assumed to be 47.9% in each upazila.[15] Local currency was converted to US dollars using the  
55 Bangladesh Bank official conversion rate in June 2020.  
56  
57  
58  
59  
60

Table 1: Costing inputs and unit costs

| Input Description                                                                      | Units            | Value              |
|----------------------------------------------------------------------------------------|------------------|--------------------|
| <b>Eligible population (Adult population (18+))</b>                                    |                  |                    |
| - Golappanj                                                                            | Persons          | 261098             |
| - Fenchuganj                                                                           | Persons          | 86503              |
| - Beanibazar                                                                           | Persons          | 209454             |
| - Bishwanath                                                                           | Persons          | 192075             |
| <b>Primary healthcare attendance rate (annual)</b>                                     | Percent          | 47.9%              |
| <b>Adult population with risk factors</b>                                              |                  |                    |
| - Use of tobacco products                                                              | Percent          | 43.7%              |
| - Hazardous or harmful use of alcohol                                                  | Percent          | 1.3%               |
| - Physical inactivity                                                                  | Percent          | 29.1%              |
| - Hypertension ( $\geq 140/90$ mmHg)                                                   | Percent          | 21.0%              |
| - Diabetes ( $\geq 7.0$ mmol/L or 126 mg/dl )                                          | Percent          | 8.3%               |
| - Hyperlipidemia ( $\geq 6$ mmol/L or 190 mg/dl)                                       | Percent          | 28.4%              |
| - Low CVD risk (0 to <10%)                                                             | Percent          | 65.0%              |
| - Medium CVD risk (10 to <20%)                                                         | Percent          | 20.0%              |
| - High CVD risk ( $\geq 20\%$ )                                                        | Percent          | 15.0%              |
| <b>Annual wage (in LCU (BDT) and USD, including benefits)</b>                          |                  |                    |
| - Doctors                                                                              | BDT (USD)/year   | 1,399,452 (16,484) |
| - Nurses                                                                               | BDT (USD)/year   | 726,360 (8,555)    |
| - CHWs                                                                                 | BDT (USD)/year   | 486,568 (5,731)    |
| - Lab technicians                                                                      | BDT (USD)/year   | 576,720 (6,793)    |
| - Accountant                                                                           | BDT (USD)/year   | 576,720 (6,793)    |
| - Administrative Assistant                                                             | BDT (USD)/year   | 446,242 (5,256)    |
| - Clerical Officer                                                                     | BDT (USD)/year   | 446,242 (5,256)    |
| - Custodian                                                                            | BDT (USD)/year   | 446,242 (5,256)    |
| - IT Personnel                                                                         | BDT (USD)/year   | 446,242 (5,256)    |
| - Program Director                                                                     | BDT (USD)/year   | 1,399,452 (16,484) |
| - Program Manager                                                                      | BDT (USD)/year   | 726,300 (8,555)    |
| - Secretary                                                                            | BDT (USD)/year   | 446,242 (5,256)    |
| - Security officer                                                                     | BDT (USD)/year   | 400,196 (4,714)    |
| - Pharmacist/Chemist                                                                   | BDT (USD)/year   | 576,720 (6,793)    |
| - Statistician                                                                         | BDT (USD)/year   | 576,720 (6,793)    |
| - Supplies manager                                                                     | BDT (USD)/year   | 486,568 (5,731)    |
| <b>Purchasing price (in LCU (BDT) and USD) of pharmaceutical drugs</b>                 |                  |                    |
| <i>Hypertension Medicine</i>                                                           |                  |                    |
| - amlodipine 5mg                                                                       | BDT (USD)/tablet | 1 (0.012)          |
| - losartan 50mg                                                                        | BDT (USD)/tablet | 8 (0.094)          |
| - hydrochlorothiazide                                                                  | BDT (USD)/tablet | 0.35 (0.004)       |
| <i>Diabetes Medicine</i>                                                               |                  |                    |
| - metformin 500mg                                                                      | BDT (USD)/tablet | 4 (0.047)          |
| - metformin 1000mg                                                                     | BDT (USD)/tablet | 9 (0.106)          |
| - gliclazide                                                                           | BDT (USD)/tablet | 3.5 (0.041)        |
| <i>Cholesterol Medicine</i>                                                            |                  |                    |
| - simvastatin 10mg                                                                     | BDT (USD)/tablet | 7 (0.082)          |
| - atorvastatin 20mg                                                                    | BDT (USD)/tablet | 10 (0.118)         |
| - atorvastatin 40mg                                                                    | BDT (USD)/tablet | 28 (0.330)         |
| <b>Purchasing price (in LCU) of diagnostic tests</b>                                   |                  |                    |
| - Diabetes (Complete blood count - panel)                                              | BDT (USD)/test   | 400 (4.71)         |
| - Diabetes (Fasting blood glucose)                                                     | BDT (USD)/test   | 120 (1.41)         |
| - Diabetes and Cholesterol (Blood lipid panel)                                         | BDT (USD)/test   | 800 (9.42)         |
| <b>Counselling patients to change behavior</b>                                         |                  |                    |
| - Time to counsel a patient to change behavior                                         | Minutes          | 10                 |
| - # of 'How to quit' informational materials disseminated per person, annually (print) | Print            | 5                  |
| - Cost of 'How to quit' informational materials, per unit (print materials)            | BDT (USD)/print  | 20 (0.24)          |
| <b>LCU to USD exchange rate</b>                                                        | BDT/USD          | 84.9               |
| <b>"Safety stock" required to be on hand for medicines</b>                             | Percent          | 3.0                |
| <b>Number of health providers in need of training</b>                                  |                  |                    |
| - Counsel patients to change behavior                                                  | Persons          | 30                 |
| - Assess patients' total CVD risk                                                      | Persons          | 10                 |
| <b>Training to counsel patients to change behavior (5A's)*</b>                         |                  |                    |
| - Classroom size                                                                       | Persons          | 30                 |
| - Hours of training needed                                                             | Persons          | 16                 |
| <b>Training to screen/diagnosis/treat patients Hypertension/CVD patients</b>           |                  |                    |
| - Classroom size                                                                       | Persons          | 30                 |
| - Hours of training needed                                                             | Persons          | 8                  |
| Number of Trainers                                                                     |                  |                    |

|                                                                                                |                    |              |
|------------------------------------------------------------------------------------------------|--------------------|--------------|
| - Professional trainer(s)                                                                      | Persons            | 2            |
| - Administrative staff                                                                         | Persons            | 1            |
| <b>Input costs for training</b>                                                                |                    |              |
| <i>Hourly wage</i>                                                                             |                    |              |
| - Professional trainer                                                                         | BDT (USD)/hour     | 500 (5.89)   |
| - Administrative staff                                                                         | BDT (USD)/hour     | 250 (2.94)   |
| <i>Per unit cost of materials</i>                                                              |                    |              |
| - Instructive handbooks                                                                        | BDT (USD)/book     | 1000 (11.8)  |
| - Facility rental for training (one day)                                                       | BDT (USD)/day      | 9000 (106)   |
| - Refreshments                                                                                 | BDT (USD)/day      | 6000 (70.7)  |
| - Per diem for staff                                                                           | BDT (USD)/day      | 3500 (41.2)  |
| - Per diem and/or salary of trainees                                                           | BDT (USD)/day      | 5000 (58.9)  |
| - Transportation stipend for staff                                                             | BDT (USD)/training | 3165 (37.3)  |
| <b>CVD Risk Screening and Diagnosis</b>                                                        |                    |              |
| Time (in minutes) a health provider spends to:                                                 |                    |              |
| - Screen patients for total CVD risk                                                           | Minutes            | 5            |
| - Provide a physical exam to assess patients' total CVD risk                                   | Minutes            | 5            |
| - Assess patient risk using a CVD risk chart                                                   | Minutes            | 5            |
| Time (in minutes) a lab technician spends to:                                                  |                    |              |
| - Administer and analyze a blood test                                                          | Minutes            | 10           |
| - Administer and analyze a urine test                                                          | Minutes            | 10           |
| <b>Treatment for High CVD Risk</b>                                                             |                    |              |
| <b># follow-up visits for a person annually with the following levels of CVD risk annually</b> |                    |              |
| - Low CVD risk ( $\geq 0\%$ to $< 10\%$ )                                                      | Visits             | 2            |
| - Medium CVD risk ( $\geq 10\%$ to $< 20\%$ )                                                  | Visits             | 3            |
| - High CVD risk ( $\geq 20\%$ )                                                                | Visits             | 4            |
| Time health providers spend with a patient during a visit?                                     |                    |              |
| - Generalists/primary care doctors                                                             | Minutes            | 5            |
| - Nurses                                                                                       | Minutes            | 5            |
| <b>Screen for CVD risk: Diagnostics cost in LCU (BDT) and USD</b>                              |                    |              |
| - Diabetes (complete blood count panel)                                                        | BDT (USD)/test     | 400 (4.7)    |
| - Diabetes (Fasting blood glucose)                                                             | BDT (USD)/test     | 120 (1.4)    |
| - Diabetes and Cholesterol (Blood lipid panel)                                                 | BDT (USD)/test     | 80 (0.9)     |
| <b>Pharmacological treatment for hypertension</b>                                              |                    |              |
| - Hypertension Protocol Step #1 (Amlodipine 5mg, 1 per day, 365 days)                          |                    |              |
| - % of all individuals with high blood pressure who receive this treatment regimen             | Percent            | 65%          |
| - Hypertension Protocol Step #2 (Amlodipine 5mg + Losartan 50mg)                               |                    |              |
| - % of all individuals with high blood pressure who receive this treatment regimen             | Percent            | 20%          |
| - Hypertension Protocol Step #3 (Amlodipine+Losartan+Hydrochlorothiazide)                      |                    |              |
| - % of all individuals with high blood pressure who receive this treatment regimen             | Percent            | 15%          |
| - Unit price of amlodipine 5mg in LCU (Taka or BDT) and USD                                    | BDT (USD)/tablet   | 1 (0.012)    |
| - Unit price of losartan 50 mg in LCU (Taka or BDT) and USD                                    | BDT (USD)/tablet   | 8 (0.094)    |
| - Unit price of hydrochlorothiazide in LCU (Taka or BDT) and USD                               | BDT (USD)/tablet   | 0.35 (0.004) |
| <b>Pharmacological treatment for diabetes</b>                                                  |                    |              |
| - Diabetes Protocol Step #1 (metformin 500mg)                                                  |                    |              |
| - % of all individuals with diabetes who receive this treatment regimen                        | Percent            | 65           |
| - Diabetes Protocol Step #2 (metformin 1000mg)                                                 |                    |              |
| - % of all individuals with diabetes who receive this treatment regimen                        | Percent            | 20           |
| - Diabetes Protocol Step #3 (metformin 1000mg+gliclazide 8mg)                                  |                    |              |
| - % of all individuals with diabetes who receive this treatment regimen                        | Percent            | 15           |
| - Unit price of metformin 500mg in LCU (Taka or BDT) and USD                                   | BDT (USD)/tablet   | 4 (0.047)    |
| - Unit price of metformin 1000mg in LCU (Taka or BDT) and USD                                  | BDT (USD)/tablet   | 9 (0.106)    |
| - Unit price of gliclazide 80mg in LCU (Taka or BDT) and USD                                   | BDT (USD)/tablet   | 3.5 (0.041)  |
| <b>Pharmacological treatment for high cholesterol (default regimens)</b>                       |                    |              |
| - High Cholesterol Protocol Step #1 (low intensity, simvastatin 10mg)                          |                    |              |
| - Percent of all individuals with high cholesterol who receive this treatment                  | Percent            | 65%          |
| - High Cholesterol Protocol Step #3 (moderate intensity, atorvastatin 20mg)                    |                    |              |
| - Percent of all individuals with high cholesterol who receive this treatment                  | Percent            | 20%          |
| - High Cholesterol Protocol Step #4 (high intensity, atorvastatin 40mg)                        |                    |              |
| - Percent of all individuals with high cholesterol who receive this treatment                  | Percent            | 15%          |
| - Unit price of simvastatin 10mg in LCU (Taka or BDT) and USD                                  | BDT (USD)/tablet   | 7 (0.082)    |
| - Unit price of simvastatin 20mg in LCU (Taka or BDT) and USD                                  | BDT (USD)/tablet   | 10 (0.118)   |
| - Unit price of atorvastatin 40mg in LCU (Taka or BDT) and USD                                 | BDT (USD)/tablet   | 28 (0.330)   |

Note: \* The '5A' (Assess, Advise, Agree, Assist, Arrange) model is an evidence-based approach entailing health behavior change counselling to prevent NCD risk factors in primary care setting (Glasgow et al., 2006; Whitlock et al, 2002). LCU: Local currency unit; BDT: Bangladesh Taka.

### 3. RESULTS

#### 3.1. Population coverage

The total population in the four sub-districts was 1.12 million, of which 749,000 were adults aged 18 and above (Table 2). The total number of people eligible to receive counselling, screening, diagnosis, and treatment under the two types of HEARTS intervention packages (i.e., hypertension control and risk-based integrated approach) in the four sub-districts was determined by the primary care attendance rate, the prevalence of low-, medium-, and high- CDV risk in the population, the prevalence of hypertension, diabetes, and high cholesterol. The estimated number of eligible persons in the catchment area of the four sub-districts was 359,000, of which 233,000, 72,000, and 54,000 were projected to be low-, medium, and high- CVD risk patients. The estimated number of persons undergoing treatment for hypertension, diabetes, and high cholesterol was 75,000, 30,000, and 102,000, respectively (Table 2). Unit costs and other cost inputs were applied to these population parameters to project total program costs.

**Table 2: Population coverage: Care cascade for counselling, screening, diagnosis, and treatment**

|                                                    | <b>Golapganj</b> | <b>Fenchuganj</b> | <b>Beanibazar</b> | <b>Bishwanath</b> | <b>Total</b> |
|----------------------------------------------------|------------------|-------------------|-------------------|-------------------|--------------|
| Total population                                   | 390688           | 129436            | 313412            | 287404            | 1120940      |
| Adult population in need (18+ years)               | 261,098          | 86,503            | 209454            | 192075            | 749130       |
| Adults who present at the health center            | 125,066          | 41,435            | 100,328           | 92,004            | 358833       |
| <b>Providing brief counseling</b>                  |                  |                   |                   |                   |              |
| Eligible to receive brief advice                   | 125,066          | 41,435            | 100,328           | 92,004            | 358833       |
| <i>Tobacco user</i>                                | 54,654           | 18,107            | 43,844            | 40,206            | 156810       |
| <i>Harmful alcohol</i>                             | 5,503            | 1,823             | 4,414             | 4,048             | 15789        |
| <i>Physical inactivity</i>                         | 15,383           | 5,096             | 12,340            | 11,316            | 44136        |
| <b>Screening and diagnosis of 10-year CVD risk</b> |                  |                   |                   |                   |              |
| Low CVD risk                                       | 81,293           | 26,933            | 65,214            | 59,803            | 233242       |
| Medium CVD risk                                    | 25,013           | 8,287             | 20,066            | 18,401            | 71767        |
| High CVD risk                                      | 18,760           | 6,215             | 15,049            | 13,801            | 53825        |
| <b>Treatment of 10-year CVD risk</b>               |                  |                   |                   |                   |              |
| Low CVD risk                                       | 81,293           | 26,933            | 65,214            | 59,803            | 233242       |
| <i>Hypertension</i>                                | 17,072           | 5,656             | 13,695            | 12,559            | 48981        |
| <i>Diabetes</i>                                    | 6,747            | 2,235             | 5,413             | 4,964             | 19359        |
| <i>Cholesterol</i>                                 | 23,087           | 7,649             | 18,521            | 16,984            | 66241        |
| Medium CVD risk                                    | 25,013           | 8,287             | 20,066            | 18,401            | 71767        |
| <i>Hypertension</i>                                | 5,253            | 1,740             | 4,214             | 3,864             | 15071        |
| <i>Diabetes</i>                                    | 2,076            | 688               | 1,665             | 1,527             | 5957         |

|               |                     |        |       |        |        |       |
|---------------|---------------------|--------|-------|--------|--------|-------|
|               | <i>Cholesterol</i>  | 7,104  | 2,354 | 5,699  | 5,226  | 20382 |
| High CVD risk |                     | 18,760 | 6,215 | 15,049 | 13,801 | 53825 |
|               | <i>Hypertension</i> | 3,940  | 1,305 | 3,160  | 2,898  | 11303 |
|               | <i>Diabetes</i>     | 1,557  | 516   | 1,249  | 1,145  | 4467  |
|               | <i>Cholesterol</i>  | 5,328  | 1,765 | 4,274  | 3,919  | 15286 |

Note: Risk factors and disease prevalence rates were assumed uniform across sub-districts.

### 3.2. Hypertension management program cost

Table 3 reports the estimated annual costs, in 2020 USD and Bangladesh Taka (BDT), of implementing the HEARTS hypertension management program in four upazilas at the population level (adults aged 18 and above). Figure 2 presents the distribution of costs by HEARTS components and sub-components. The total annual cost was estimated at USD 3.3 million, equivalent to USD 2.9 per capita, USD 4.3 per adult, and USD 9.1 per eligible participant. Module 'E' (Evidence-based treatment protocols) constitutes the largest cost share (USD 1.35 million; 42%), followed by Module 'A' (Access to medicines and technology, 40%). The projected medication expenditure per patient treated with medications for hypertension was USD 17.

**Table 3: Total annual cost of HEARTS hypertension control program in four sub-districts**

|                                                                    | Golapganj         |               | Fenchuganj        |               | Beanibazar        |               | Bishwanath        |               | Total            |                |
|--------------------------------------------------------------------|-------------------|---------------|-------------------|---------------|-------------------|---------------|-------------------|---------------|------------------|----------------|
|                                                                    | BDT               | USD           | BDT               | USD           | BDT               | USD           | BDT               | USD           | BDT              | USD            |
| <b>H: Healthy Lifestyles</b>                                       | <b>13,335,339</b> | <b>157071</b> | <b>4,765,107</b>  | <b>56126</b>  | <b>10,800,324</b> | <b>127212</b> | <b>9,947,252</b>  | <b>117164</b> | <b>38848022</b>  | <b>457574</b>  |
| <b>H1: Training costs</b>                                          | <b>418,990</b>    | <b>4935</b>   | <b>418,990</b>    | <b>4935</b>   | <b>418,990</b>    | <b>4935</b>   | <b>418,990</b>    | <b>4935</b>   | <b>1675960</b>   | <b>19740</b>   |
| H1.1: Facility rental (% of H1)                                    | 18,000            | 212           | 18,000            | 212           | 18,000            | 212           | 18,000            | 212           | 72000            | 848            |
| H1.2: Human resources                                              | 20,000            | 236           | 20,000            | 236           | 20,000            | 236           | 20,000            | 236           | 80000            | 942            |
| H1.3: Instructive handbooks                                        | 35,000            | 412           | 35,000            | 412           | 35,000            | 412           | 35,000            | 412           | 140000           | 1649           |
| H1.4: Per diem/transportation                                      | 339,990           | 4005          | 339,990           | 4005          | 339,990           | 4005          | 339,990           | 4005          | 1359960          | 16018          |
| H1.5: Refreshments                                                 | 6,000             | 71            | 6,000             | 71            | 6,000             | 71            | 6,000             | 71            | 24000            | 283            |
| <b>H2: Brief counselling costs</b>                                 | <b>12,816,349</b> | <b>150958</b> | <b>4,246,117</b>  | <b>50013</b>  | <b>10,281,334</b> | <b>121099</b> | <b>9,428,262</b>  | <b>111051</b> | <b>36772062</b>  | <b>433122</b>  |
| H2.1: Tobacco                                                      | 9,272,756         | 109220        | 3,072,108         | 36185         | 7,438,647         | 87617         | 6,821,441         | 80347         | 26604952         | 313368         |
| <i>Provider time to administer 5A's</i>                            | 3,807,374         | 44845         | 1,261,401         | 14857         | 3,054,293         | 35975         | 2,800,870         | 32990         | 10923938         | 128668         |
| <i>Informational materials (print)</i>                             | 5,465,382         | 64374         | 1,810,707         | 21328         | 4,384,354         | 51641         | 4,020,572         | 47357         | 15681014         | 184700         |
| H2.2: Alcohol                                                      | 933,641           | 10997         | 309,320           | 3643          | 748,971           | 8822          | 686,827           | 8090          | 2678759          | 31552          |
| <i>Provider time to administer 5A's</i>                            | 383,351           | 4515          | 127,006           | 1496          | 307,526           | 3622          | 282,010           | 3322          | 1099893          | 12955          |
| <i>Informational materials (print)</i>                             | 550,290           | 6482          | 182,314           | 2147          | 441,445           | 5200          | 404,817           | 4768          | 1578866          | 18597          |
| H2.3: Physical inactivity                                          | 2,609,952         | 30741         | 864,689           | 10185         | 2,093,715         | 24661         | 1,919,994         | 22615         | 7488350          | 88202          |
| <i>Provider time to administer 5A's</i>                            | 1,071,641         | 12622         | 355,040           | 4182          | 859,675           | 10126         | 788,345           | 9286          | 3074701          | 36216          |
| <i>Informational materials (print)</i>                             | 1,538,311         | 18119         | 509,650           | 6003          | 1,234,040         | 14535         | 1,131,648         | 13329         | 4413649          | 51986          |
| <b>H3: Other program costs</b>                                     | <b>100,000</b>    | <b>1178</b>   | <b>100,000</b>    | <b>1178</b>   | <b>100,000</b>    | <b>1178</b>   | <b>100,000</b>    | <b>1178</b>   | <b>400000</b>    | <b>4711</b>    |
| <i>Community awareness meetings</i>                                | 50,000            | 589           | 50,000            | 589           | 50,000            | 589           | 50,000            | 589           | 200000           | 2356           |
| <i>Community health workers training</i>                           | 50,000            | 589           | 50,000            | 589           | 50,000            | 589           | 50,000            | 589           | 200000           | 2356           |
| <b>E: Evidence-based Treatment Protocols</b>                       | <b>40,027,365</b> | <b>471465</b> | <b>13,261,255</b> | <b>156199</b> | <b>32,110,134</b> | <b>378211</b> | <b>29,445,864</b> | <b>346830</b> | <b>114844617</b> | <b>1352705</b> |
| E1: Ask about patient history - provider time                      | 5,317,334         | 62631         | 1,761,658         | 20750         | 4,265,589         | 50243         | 3,911,661         | 46074         | 15256241         | 179697         |
| E2: Assess via physical exam and diagnostic tests - provider time  | 5,317,334         | 62631         | 1,761,658         | 20750         | 4,265,589         | 50243         | 3,911,661         | 46074         | 15256241         | 179697         |
| E3: Return visits - Counsel and treat per protocol - provider time | 29,392,698        | 346204        | 9,737,939         | 114699        | 23,578,955        | 277726        | 21,622,542        | 254682        | 84332134         | 993311         |
| <b>A: Access to Essential Medicines and Technologies</b>           | <b>38,207,428</b> | <b>450029</b> | <b>12,770,811</b> | <b>150422</b> | <b>30,683,451</b> | <b>361407</b> | <b>28,151,518</b> | <b>331584</b> | <b>109813207</b> | <b>1293442</b> |
| <b>A1: Hypertension medications</b>                                | <b>38,039,175</b> | <b>448047</b> | <b>12,602,558</b> | <b>148440</b> | <b>30,515,199</b> | <b>359425</b> | <b>27,983,265</b> | <b>329603</b> | <b>109140197</b> | <b>1285515</b> |
| <i>Amlodipine 5mg</i>                                              | 9,873,894         | 116300        | 3,271,268         | 38531         | 7,920,882         | 93297         | 7,263,664         | 85556         | 28329707         | 333683         |
| <i>Losartan 50mg</i>                                               | 27,646,902        | 325641        | 9,159,549         | 107886        | 22,178,470        | 261231        | 20,338,259        | 239555        | 79323180         | 934313         |
| <i>Hydrochlorothiazide 12.5mg</i>                                  | 518,379           | 6106          | 171,742           | 2023          | 415,846           | 4898          | 381,342           | 4492          | 1487310          | 17518          |

|                                                                                                              | Golapganj  |         | Fenchuganj |        | Beanibazar |        | Bishwanath |        | Total     |         |
|--------------------------------------------------------------------------------------------------------------|------------|---------|------------|--------|------------|--------|------------|--------|-----------|---------|
|                                                                                                              | BDT        | USD     | BDT        | USD    | BDT        | USD    | BDT        | USD    | BDT       | USD     |
| <b>A2: Diagnostic technologies, machines, and supplies</b>                                                   | 168,253    | 1982    | 168,253    | 1982   | 168,253    | 1982   | 168,253    | 1982   | 673010    | 7927    |
| <b>R: Risk-based Management</b>                                                                              | 172,334    | 2030    | 172,334    | 2030   | 172,334    | 2030   | 172,334    | 2030   | 689336    | 8119    |
| <b>R1: Training costs</b>                                                                                    | 172,334    | 2030    | 172,334    | 2030   | 172,334    | 2030   | 172,334    | 2030   | 689336    | 8119    |
| <b>T: Team-based care Savings from training nurses and CHWs to do tasks customarily performed by doctors</b> | 14,980,107 | 176444  | 4,962,980  | 58457  | 12,017,110 | 141544 | 11,020,015 | 129800 | 42980212  | 506245  |
| <b>T1: Savings from training nurses</b>                                                                      | 13,141,197 | 154784  | 4,353,741  | 51281  | 10,541,928 | 124169 | 9,667,234  | 113866 | 37704100  | 444100  |
| <i>Savings from counselling to change behavior</i>                                                           | 1,355,873  | 15970   | 449,207    | 5291   | 1,087,688  | 12811  | 997,439    | 11748  | 3890208   | 45821   |
| <i>Savings from screening for--and assess--CVD risk</i>                                                      | 3,367,235  | 39661   | 1,115,581  | 13140  | 2,701,212  | 31816  | 2,477,084  | 29176  | 9661112   | 113794  |
| <i>Savings from treating CVD risk</i>                                                                        | 8,418,089  | 99153   | 2,788,952  | 32850  | 6,753,029  | 79541  | 6,192,711  | 72941  | 24152780  | 284485  |
| <b>T2: Savings from training CHWs</b>                                                                        | 1,838,909  | 21660   | 609,239    | 7176   | 1,475,181  | 17376  | 1,352,781  | 15934  | 5276112   | 62145   |
| <i>Savings from counselling to change behavior</i>                                                           | 1,838,909  | 21660   | 609,239    | 7176   | 1,475,181  | 17376  | 1,352,781  | 15934  | 5276112   | 62145   |
| <b>S: Systems for monitoring</b>                                                                             | 3,114,636  | 36686   | 3,114,636  | 36686  | 3,114,636  | 36686  | 3,114,636  | 36686  | 12458546  | 146744  |
| <b>S1: Human resources</b>                                                                                   | 2,969,636  | 34978   | 2,969,636  | 34978  | 2,969,636  | 34978  | 2,969,636  | 34978  | 11878546  | 139912  |
| <b>S2: Technology</b>                                                                                        | 110,000    | 1296    | 110,000    | 1296   | 110,000    | 1296   | 110,000    | 1296   | 440000    | 5183    |
| <b>S3: Supplies</b>                                                                                          | 10,000     | 118     | 10,000     | 118    | 10,000     | 118    | 10,000     | 118    | 40000     | 471     |
| <b>S4: Training</b>                                                                                          | 25,000     | 294     | 25,000     | 294    | 25,000     | 294    | 25,000     | 294    | 100000    | 1178    |
| <b>Total Program Cost (H+E+A+R+T+S)</b>                                                                      | 94,857,102 | 1117280 | 34,084,143 | 401462 | 76,880,879 | 905546 | 70,831,603 | 834295 | 276653727 | 3258583 |



[Insert Figure 2 here]

**Figure 2: Distribution of annual cost by HEARTS components**

Most of the projected annual cost (94%) of implementing Module ‘H’ (Healthy-lifestyles counselling) was attributable to the cost of provider time and information materials for counselling patients (USD 433,000). The estimated cost for Module ‘E’ (Evidence-based treatment protocols) was attributable to provider time across three major activities: asking patient history (USD 180,000; 13%), patient assessment via physical exam and diagnostic tests (USD 180,000; 13%), and conducting return visits (USD 993,000, 74%). The projected cost to implement Module ‘S’ (Systems for monitoring) was USD 147,000, primarily attributed to administration staff labor costs (95%), with the remaining cost allocated to technology (software/hardware).

Table 4 highlights an important programmatic aspect by describing health providers’ time needed to implement the hypertension control program. Implementing the program at the full population level in all four sub-districts was estimated to require the full time equivalent of 56 doctors, 56 nurses, and 6 community health workers. The largest time requirement activities included providing initial screening and diagnosis and conducting return visits.



**Table 4: Hypertension control program: estimated health provider time for counselling, screening, diagnosis, and treatment**

| Activity                                              | Golapganj           |      | Fenchugonj          |     | Beanibazar          |      | Bishwanath          |     | Total       |
|-------------------------------------------------------|---------------------|------|---------------------|-----|---------------------|------|---------------------|-----|-------------|
|                                                       | Workdays            | FTE  | Workdays            | FTE | Workdays            | FTE  | Workdays            | FTE | FTE         |
| <b>Counselling to change behavior</b>                 |                     |      |                     |     |                     |      |                     |     |             |
| Doctor                                                | 524 days, 7 hours   | 2.0  | 173 days, 6 hours   | 0.7 | 420 days, 2 hours   | 1.6  | 385 days, 2 hours   | 1.5 | <b>5.8</b>  |
| Nurses                                                | 524 days, 7 hours   | 2.0  | 173 days, 6 hours   | 0.7 | 420 days, 2 hours   | 1.6  | 385 days, 2 hours   | 1.5 | <b>5.8</b>  |
| CHW                                                   | 524 days, 7 hours   | 2.0  | 173 days, 6 hours   | 0.7 | 420 days, 2 hours   | 1.6  | 385 days, 2 hours   | 1.5 | <b>5.8</b>  |
| <b>Screening and diagnosis</b>                        |                     |      |                     |     |                     |      |                     |     |             |
| Doctor                                                | 1,302 days, 1 hours | 5.0  | 431 days, 6 hours   | 1.7 | 1,045 days, 2 hours | 4.0  | 958 days, 3 hours   | 3.7 | <b>14.4</b> |
| Nurses                                                | 1,302 days, 1 hours | 5.0  | 431 days, 6 hours   | 1.7 | 1,045 days, 2 hours | 4.0  | 958 days, 3 hours   | 3.7 | <b>14.4</b> |
| <b>Return visits - Counsel and treat per protocol</b> |                     |      |                     |     |                     |      |                     |     |             |
| Doctor                                                | 3,256 days, 4 hours | 12.5 | 1,079 days, 0 hours | 4.2 | 2,612 days, 1 hours | 10.0 | 2,395 days, 1 hours | 9.2 | <b>35.9</b> |
| Nurses                                                | 3,256 days, 4 hours | 12.5 | 1,079 days, 0 hours | 4.2 | 2,612 days, 1 hours | 10.0 | 2,395 days, 1 hours | 9.2 | <b>35.9</b> |

Note: FTE: Full-time equivalent (annual: total minutes/124800).

### 3.3. Risk-based integrated hypertension, diabetes, and high cholesterol management program cost

Table 5 reports the estimated costs of implementing the risk-based hypertension, diabetes, and high cholesterol management program in four upazilas at the population level (adults aged 18 and above). Figure 2 presents the distribution of costs by HEARTS components. The total annual cost was estimated at USD 15.7 million, equivalent to USD 14 per capita, USD 21 per adult, and USD 44 per eligible participant. Module 'A' (Access to medicines and technology) constitutes the largest cost share (USD 12.9 million; 82%), followed by Module 'E' (Evidence-based treatment protocols, USD 2 million; 13%). Within Module 'A', the projected costs of diagnostic tests, hypertension medications, diabetes medications, and cholesterol medications were USD 5.7 million (45% of module costs), USD 1.3 million (10%), USD 1 million (8%), and USD 4.9 million (38%), respectively. The projected medication expenditure per patient treated with medications for hypertension, diabetes, and cholesterol was USD 17, USD 34, and USD 48, respectively.

**Table 5: Annual cost of implementing risk-based hypertension, diabetes, and high cholesterol management program in four sub-districts**

|                                                                           | Golapganj          |                  | Fenchuganj         |                | Beanibazar         |                | Bishwanath         |                | Total             |                 |
|---------------------------------------------------------------------------|--------------------|------------------|--------------------|----------------|--------------------|----------------|--------------------|----------------|-------------------|-----------------|
|                                                                           | BDT                | USD              | BDT                | USD            | BDT                | USD            | BDT                | USD            | BDT               | USD             |
| <b>H: Healthy Lifestyles Counselling</b>                                  | <b>13,335,339</b>  | <b>121,116</b>   | <b>4,765,107</b>   | <b>56126</b>   | <b>10,800,324</b>  | <b>127212</b>  | <b>9,947,252</b>   | <b>117164</b>  | <b>38848022</b>   | <b>457574</b>   |
| <b>H1: Training costs</b>                                                 | <b>418,990</b>     | <b>4,287</b>     | <b>418,990</b>     | <b>4935</b>    | <b>418,990</b>     | <b>4935</b>    | <b>418,990</b>     | <b>4935</b>    | 1675960           | 19740           |
| H1.1: Facility rental (% of H1)                                           | 18,000             | 212              | 18,000             | 212            | 18,000             | 212            | 18,000             | 212            | 72000             | 848             |
| H1.2: Human resources                                                     | 20,000             | 236              | 20,000             | 236            | 20,000             | 236            | 20,000             | 236            | 80000             | 942             |
| H1.3: Instructive handbooks                                               | 35,000             | 353              | 35,000             | 412            | 35,000             | 412            | 35,000             | 412            | 140000            | 1649            |
| H1.4: Per diem/transportation                                             | 339,990            | 3,416            | 339,990            | 4005           | 339,990            | 4005           | 339,990            | 4005           | 1359960           | 16018           |
| H1.5: Refreshments                                                        | 6,000              | 71               | 6,000              | 71             | 6,000              | 71             | 6,000              | 71             | 24000             | 283             |
| <b>H2: Brief counselling costs</b>                                        | <b>12,816,349</b>  | <b>115,651</b>   | <b>4,246,117</b>   | <b>50013</b>   | <b>10,281,334</b>  | <b>121099</b>  | <b>9,428,262</b>   | <b>111051</b>  | <b>36772062</b>   | <b>433122</b>   |
| H2.1: Tobacco                                                             | 9,272,756          | 83,675           | 3,072,108          | 36185          | 7,438,647          | 87617          | 6,821,441          | 80347          | 26604952          | 313368          |
| <i>Provider time to administer 5A's</i>                                   | <i>3,807,374</i>   | <i>30,030</i>    | <i>1,261,401</i>   | <i>14857</i>   | <i>3,054,293</i>   | <i>35975</i>   | <i>2,800,870</i>   | <i>32990</i>   | <i>10923938</i>   | <i>128668</i>   |
| <i>Informational materials (print)</i>                                    | <i>5,465,382</i>   | <i>53,645</i>    | <i>1,810,707</i>   | <i>21328</i>   | <i>4,384,354</i>   | <i>51641</i>   | <i>4,020,572</i>   | <i>47357</i>   | <i>15681014</i>   | <i>184700</i>   |
| H2.2: Alcohol                                                             | 933,641            | 8,425            | 309,320            | 3643           | 748,971            | 8822           | 686,827            | 8090           | 2678759           | 31552           |
| <i>Provider time to administer 5A's</i>                                   | <i>383,351</i>     | <i>3,024</i>     | <i>127,006</i>     | <i>1496</i>    | <i>307,526</i>     | <i>3622</i>    | <i>282,010</i>     | <i>3322</i>    | <i>1099893</i>    | <i>12955</i>    |
| <i>Informational materials (print)</i>                                    | <i>550,290</i>     | <i>5,401</i>     | <i>182,314</i>     | <i>2147</i>    | <i>441,445</i>     | <i>5200</i>    | <i>404,817</i>     | <i>4768</i>    | <i>1578866</i>    | <i>18597</i>    |
| H2.3: Physical inactivity                                                 | 2,609,952          | 23,552           | 864,689            | 10185          | 2,093,715          | 24661          | 1,919,994          | 22615          | 7488350           | 88202           |
| <i>Provider time to administer 5A's</i>                                   | <i>1,071,641</i>   | <i>8,452</i>     | <i>355,040</i>     | <i>4182</i>    | <i>859,675</i>     | <i>10126</i>   | <i>788,345</i>     | <i>9286</i>    | <i>3074701</i>    | <i>36216</i>    |
| <i>Informational materials (print)</i>                                    | <i>1,538,311</i>   | <i>15,099</i>    | <i>509,650</i>     | <i>6003</i>    | <i>1,234,040</i>   | <i>14535</i>   | <i>1,131,648</i>   | <i>13329</i>   | <i>4413649</i>    | <i>51986</i>    |
| <b>H3: Other program costs</b>                                            | <b>100,000</b>     | <b>1,178</b>     | <b>100,000</b>     | <b>1178</b>    | <b>100,000</b>     | <b>1178</b>    | <b>100,000</b>     | <b>1178</b>    | <b>400000</b>     | <b>4711</b>     |
| <i>Community awareness meetings</i>                                       | <i>50,000</i>      | <i>589</i>       | <i>50,000</i>      | <i>589</i>     | <i>50,000</i>      | <i>589</i>     | <i>50,000</i>      | <i>589</i>     | <i>200000</i>     | <i>2356</i>     |
| <i>Community health workers training</i>                                  | <i>50,000</i>      | <i>589</i>       | <i>50,000</i>      | <i>589</i>     | <i>50,000</i>      | <i>589</i>     | <i>50,000</i>      | <i>589</i>     | <i>200000</i>     | <i>2356</i>     |
| <b>E: Evidence-based Treatment Protocols</b>                              | <b>60,223,213</b>  | <b>601,090</b>   | <b>19,952,235</b>  | <b>235009</b>  | <b>48,311,335</b>  | <b>569038</b>  | <b>44,302,805</b>  | <b>521823</b>  | <b>172789587</b>  | <b>2035213</b>  |
| <b>E1: Ask about patient history - provider time</b>                      | <b>5,317,334</b>   | <b>68,718</b>    | <b>1,761,658</b>   | <b>20750</b>   | <b>4,265,589</b>   | <b>50243</b>   | <b>3,911,661</b>   | <b>46074</b>   | <b>15256241</b>   | <b>179697</b>   |
| <b>E2: Assess via physical exam and diagnostic tests - provider time</b>  | <b>25,513,182</b>  | <b>266,949</b>   | <b>8,452,638</b>   | <b>99560</b>   | <b>20,466,790</b>  | <b>241069</b>  | <b>18,768,602</b>  | <b>221067</b>  | <b>73201212</b>   | <b>862205</b>   |
| <b>E3: Return visits - Counsel and treat per protocol - provider time</b> | <b>29,392,698</b>  | <b>265,423</b>   | <b>9,737,939</b>   | <b>114699</b>  | <b>23,578,955</b>  | <b>277726</b>  | <b>21,622,542</b>  | <b>254682</b>  | <b>84332134</b>   | <b>993311</b>   |
| <b>A: Access to Essential Medicines and tech.</b>                         | <b>381,551,547</b> | <b>3,745,438</b> | <b>126,522,338</b> | <b>1490251</b> | <b>306,115,661</b> | <b>3605603</b> | <b>280,730,326</b> | <b>3306600</b> | <b>1094919872</b> | <b>12896583</b> |
| <b>A1: Diagnostic tests</b>                                               | <b>170,039,655</b> | <b>1,669,019</b> | <b>56,334,940</b>  | <b>663545</b>  | <b>136,406,582</b> | <b>1606674</b> | <b>125,088,536</b> | <b>1473363</b> | <b>487869714</b>  | <b>5746404</b>  |
| <i>Complete blood count (panel)</i>                                       | <i>51,527,168</i>  | <i>505,763</i>   | <i>17,071,194</i>  | <i>201074</i>  | <i>41,335,328</i>  | <i>486871</i>  | <i>37,905,617</i>  | <i>446474</i>  | <i>147839307</i>  | <i>1741335</i>  |
| <i>Blood lipid panel</i>                                                  | <i>103,054,336</i> | <i>1,011,527</i> | <i>34,142,388</i>  | <i>402148</i>  | <i>82,670,656</i>  | <i>973742</i>  | <i>75,811,234</i>  | <i>892947</i>  | <i>295678614</i>  | <i>3482669</i>  |
| <i>Fasting blood glucose (FPG)</i>                                        | <i>15,458,150</i>  | <i>151,729</i>   | <i>5,121,358</i>   | <i>60322</i>   | <i>12,400,598</i>  | <i>146061</i>  | <i>11,371,685</i>  | <i>133942</i>  | <i>44351792</i>   | <i>522400</i>   |

|                                                                                                               | Golapganj          |                  | Fenchuganj         |                | Beanibazar         |                | Bishwanath         |                | Total             |                 |
|---------------------------------------------------------------------------------------------------------------|--------------------|------------------|--------------------|----------------|--------------------|----------------|--------------------|----------------|-------------------|-----------------|
|                                                                                                               | BDT                | USD              | BDT                | USD            | BDT                | USD            | BDT                | USD            | BDT               | USD             |
| <b>A2: Hypertension medications</b>                                                                           | <b>38,039,175</b>  | <b>373,372</b>   | <b>12,602,558</b>  | <b>148440</b>  | <b>30,515,199</b>  | <b>359425</b>  | <b>27,983,265</b>  | <b>329603</b>  | <b>109140197</b>  | <b>1285515</b>  |
| <i>Amlodipine 5mg</i>                                                                                         | 9,873,894          | 96,917           | 3,271,268          | 38531          | 7,920,882          | 93297          | 7,263,664          | 85556          | 28329707          | 333683          |
| <i>Losartan 50mg</i>                                                                                          | 27,646,902         | 271,367          | 9,159,549          | 107886         | 22,178,470         | 261231         | 20,338,259         | 239555         | 79323180          | 934313          |
| <i>Hydrochlorothiazide 12.5mg</i>                                                                             | 518,379            | 5,088            | 171,742            | 2023           | 415,846            | 4898           | 381,342            | 4492           | 1487310           | 17518           |
| <b>A3: Diabetes medications</b>                                                                               | <b>29,756,859</b>  | <b>292,078</b>   | <b>9,858,588</b>   | <b>116120</b>  | <b>23,871,087</b>  | <b>281167</b>  | <b>21,890,435</b>  | <b>257838</b>  | <b>85376969</b>   | <b>1005618</b>  |
| <i>Metformin 500mg</i>                                                                                        | 10,146,601         | 99,594           | 3,361,617          | 39595          | 8,139,649          | 95873          | 7,464,279          | 87918          | 29112147          | 342899          |
| <i>Metformin 1000mg</i>                                                                                       | 17,561,425         | 172,374          | 5,818,183          | 68530          | 14,087,855         | 165935         | 12,918,945         | 152167         | 50386408          | 593479          |
| <i>Gliclazide</i>                                                                                             | 2,048,833          | 20,110           | 678,788            | 7995           | 1,643,583          | 19359          | 1,507,210          | 17753          | 5878414           | 69239           |
| <b>A4: Cholesterol medications</b>                                                                            | <b>143,547,605</b> | <b>1,408,987</b> | <b>47,557,999</b>  | <b>560165</b>  | <b>115,154,540</b> | <b>1356355</b> | <b>105,599,837</b> | <b>1243814</b> | <b>411859982</b>  | <b>4851119</b>  |
| <i>Simvastatin 10mg</i>                                                                                       | 60,757,359         | 596,362          | 20,129,200         | 237093         | 48,739,829         | 574085         | 44,695,745         | 526452         | 174322132         | 2053264         |
| <i>Atorvastatin 20mg</i>                                                                                      | 26,706,531         | 262,137          | 8,848,000          | 104217         | 21,424,100         | 252345         | 19,646,481         | 231407         | 76625113          | 902534          |
| <i>Atorvastatin 40mg</i>                                                                                      | 56,083,716         | 550,488          | 18,580,800         | 218855         | 44,990,611         | 529925         | 41,257,611         | 485955         | 160912737         | 1895321         |
| <b>A5: Diagnostic tech. machines, and supplies</b>                                                            | <b>168,253</b>     | <b>1,982</b>     | <b>168,253</b>     | <b>1982</b>    | <b>168,253</b>     | <b>1982</b>    | <b>168,253</b>     | <b>1982</b>    | <b>673010</b>     | <b>7927</b>     |
| <b>R: Risk-based Management</b>                                                                               | <b>5,489,668</b>   | <b>73,005</b>    | <b>1,933,992</b>   | <b>22780</b>   | <b>4,437,923</b>   | <b>52272</b>   | <b>4,083,995</b>   | <b>48104</b>   | <b>15945577</b>   | <b>187816</b>   |
| <b>R1: Training costs</b>                                                                                     | <b>172,334</b>     | <b>4,287</b>     | <b>172,334</b>     | <b>2030</b>    | <b>172,334</b>     | <b>2030</b>    | <b>172,334</b>     | <b>2030</b>    | <b>689336</b>     | <b>8119</b>     |
| <b>R2: Estimate risk using risk charts</b>                                                                    | <b>5,317,334</b>   | <b>68,718</b>    | <b>1,761,658</b>   | <b>20750</b>   | <b>4,265,589</b>   | <b>50243</b>   | <b>3,911,661</b>   | <b>46074</b>   | <b>15256241</b>   | <b>179697</b>   |
| <b>T: Team-based care: Savings from training nurses and CHWs to do tasks customarily performed by doctors</b> | <b>26,765,431</b>  | <b>315258</b>    | <b>8,867,514</b>   | <b>104447</b>  | <b>21,471,350</b>  | <b>252902</b>  | <b>19,689,810</b>  | <b>231918</b>  | <b>76794104</b>   | <b>904524</b>   |
| <b>T1: Savings from training nurses</b>                                                                       | <b>24,926,521</b>  | <b>293599</b>    | <b>8,258,274</b>   | <b>97271</b>   | <b>19,996,168</b>  | <b>235526</b>  | <b>18,337,029</b>  | <b>215984</b>  | <b>71517993</b>   | <b>842379</b>   |
| <i>Savings from counselling to change behavior</i>                                                            | 1,355,873          | 15970            | 449,207            | 5291           | 1,087,688          | 12811          | 997,439            | 11748          | 3890208           | 45821           |
| <i>Savings from screening for--and assess--CVD risk</i>                                                       | 15,152,559         | 178475           | 5,020,114          | 59130          | 12,155,452         | 143174         | 11,146,879         | 131294         | 43475005          | 512073          |
| <i>Savings from treating CVD risk</i>                                                                         | 8,418,089          | 99153            | 2,788,952          | 32850          | 6,753,029          | 79541          | 6,192,711          | 72941          | 24152780          | 284485          |
| <b>T2: Savings from training CHWs</b>                                                                         | <b>1,838,909</b>   | <b>21660</b>     | <b>609,239</b>     | <b>7176</b>    | <b>1,475,181</b>   | <b>17376</b>   | <b>1,352,781</b>   | <b>15934</b>   | <b>5276112</b>    | <b>62145</b>    |
| <i>Savings from counselling to change behavior</i>                                                            | 1,838,909          | 21660            | 609,239            | 7176           | 1,475,181          | 17376          | 1,352,781          | 15934          | 5276112           | 62145           |
| <b>S: Systems for monitoring</b>                                                                              | <b>3,114,636</b>   | <b>36686</b>     | <b>3,114,636</b>   | <b>36686</b>   | <b>3,114,636</b>   | <b>36686</b>   | <b>3,114,636</b>   | <b>36686</b>   | <b>12458546</b>   | <b>146744</b>   |
| <b>S1: Human resources</b>                                                                                    | <b>2,969,636</b>   | <b>34978</b>     | <b>2,969,636</b>   | <b>34978</b>   | <b>2,969,636</b>   | <b>34978</b>   | <b>2,969,636</b>   | <b>34978</b>   | <b>11878546</b>   | <b>139912</b>   |
| <b>S2: Technology</b>                                                                                         | <b>110,000</b>     | <b>1296</b>      | <b>110,000</b>     | <b>1296</b>    | <b>110,000</b>     | <b>1296</b>    | <b>110,000</b>     | <b>1296</b>    | <b>440000</b>     | <b>5183</b>     |
| <b>S3: Supplies</b>                                                                                           | <b>10,000</b>      | <b>118</b>       | <b>10,000</b>      | <b>118</b>     | <b>10,000</b>      | <b>118</b>     | <b>10,000</b>      | <b>118</b>     | <b>40000</b>      | <b>471</b>      |
| <b>S4: Training</b>                                                                                           | <b>25,000</b>      | <b>294</b>       | <b>25,000</b>      | <b>294</b>     | <b>25,000</b>      | <b>294</b>     | <b>25,000</b>      | <b>294</b>     | <b>100000</b>     | <b>1178</b>     |
| <b>Total Program Cost (H+E+A+R+T+S)</b>                                                                       | <b>463,714,403</b> | <b>5461889</b>   | <b>156,288,308</b> | <b>1840852</b> | <b>372,779,879</b> | <b>4390811</b> | <b>342,179,014</b> | <b>4030377</b> | <b>1334961604</b> | <b>15723929</b> |

1  
2  
3 The adoption of task-sharing approach would save USD 905,000, of which USD 842,000 comes  
4 from using nurses to complete tasks customarily performed by doctors (i.e., counselling, screening, and  
5 assessing CVD risk, and treating according to CVD risk) and USD 62,000 comes from using CHWs to  
6 provide counselling to change behavior. Implementing the risk-based hypertension, diabetes, and high  
7 cholesterol management program at the full population level in all four sub-districts was estimated to  
8 require the full time equivalent of 63 doctors, 63 nurses, 6 CHWs, and 101 lab technicians (Table 6). The  
9 largest time requirement activities included providing initial screening and diagnosis and conducting  
10 return visits.  
11  
12  
13  
14  
15  
16  
17  
18  
19  
20  
21  
22  
23  
24  
25  
26  
27  
28  
29  
30  
31  
32  
33  
34  
35  
36  
37  
38  
39  
40  
41  
42  
43  
44  
45  
46  
47  
48  
49  
50  
51  
52  
53  
54  
55  
56  
57  
58  
59  
60

For peer review only

**Table 6: Integrated risk-based approach: estimated health provider time for counselling, screening, diagnosis, and treatment**

| Activity                                              | Golapganj           |      | Fenchugonj          |      | Beanibazar          |      | Bishwanath          |      | Total        |
|-------------------------------------------------------|---------------------|------|---------------------|------|---------------------|------|---------------------|------|--------------|
|                                                       | Workdays            | FTE  | Workdays            | FTE  | Workdays            | FTE  | Workdays            | FTE  | FTE          |
| <b>Counselling to change behavior</b>                 |                     |      |                     |      |                     |      |                     |      |              |
| Doctor                                                | 524 days, 7 hours   | 2.0  | 173 days, 6 hours   | 0.7  | 420 days, 2 hours   | 1.6  | 385 days, 2 hours   | 1.5  | <b>5.8</b>   |
| Nurses                                                | 524 days, 7 hours   | 2.0  | 173 days, 6 hours   | 0.7  | 420 days, 2 hours   | 1.6  | 385 days, 2 hours   | 1.5  | <b>5.8</b>   |
| CHW                                                   | 524 days, 7 hours   | 2.0  | 173 days, 6 hours   | 0.7  | 420 days, 2 hours   | 1.6  | 385 days, 2 hours   | 1.5  | <b>5.8</b>   |
| <b>Screening and diagnosis</b>                        |                     |      |                     |      |                     |      |                     |      |              |
| Doctor                                                | 1,302 days, 1 hours | 5.0  | 431 days, 6 hours   | 1.7  | 1,045 days, 2 hours | 4.0  | 958 days, 3 hours   | 3.7  | <b>14.4</b>  |
| Nurses                                                | 1,302 days, 1 hours | 5.0  | 431 days, 6 hours   | 1.7  | 1,045 days, 2 hours | 4.0  | 958 days, 3 hours   | 3.7  | <b>14.4</b>  |
| <b>Screening and diagnosis by Lab technicians</b>     | 9,119 days, 3 hours | 35.1 | 3,021 days, 6 hours | 11.6 | 7,315 days, 0 hours | 28.1 | 6,708 days, 1 hours | 25.8 | <b>100.6</b> |
| <b>Estimating CVD risk using risk charts</b>          |                     |      |                     |      |                     |      |                     |      |              |
| Doctor                                                | 2,658,667           | 2.5  | 880,829             | 0.8  | 2,132,795           | 2.0  | 1,955,830           | 1.8  | <b>7.2</b>   |
| Nurses                                                | 2,658,667           | 2.5  | 880,829             | 0.8  | 2,132,795           | 2.0  | 1,955,830           | 1.8  | <b>7.2</b>   |
| <b>Return visits - Counsel and treat per protocol</b> |                     |      |                     |      |                     |      |                     |      |              |
| Doctor                                                | 3,256 days, 4 hours | 12.5 | 1,079 days, 0 hours | 4.2  | 2,612 days, 1 hours | 10.0 | 2,395 days, 1 hours | 9.2  | <b>35.9</b>  |
| Nurses                                                | 3,256 days, 4 hours | 12.5 | 1,079 days, 0 hours | 4.2  | 2,612 days, 1 hours | 10.0 | 2,395 days, 1 hours | 9.2  | <b>35.9</b>  |

#### 4. Discussion

The HEARTS pilot project in four Bangladesh sub-districts launched a framework for hypertension management in primary care, with a potential for expanding into a comprehensive CVD prevention approach that incorporates hypertension, diabetes, and cholesterol management. This study projects the expected cost of scaling up the program to all eligible adults in the participating sub-districts. We assessed two program scenarios: a hypertension management program and an integrated risk-based hypertension, diabetes, and cholesterol management program. The total annual cost was estimated at USD 3.3 and 15.7 million USD for the hypertension and risk-based comprehensive approach, respectively. The overall per capita cost was approximately USD 2.9 per capita for the hypertension control program and USD 14 per capita for the risk-based comprehensive approach. These estimates correspond to 0.15% and 0.7% of the 2020 gross domestic product per capita in Bangladesh, respectively. The main cost drivers for the hypertension control program were medication expenditures (40%) and the cost of provider time for providing care during multiple visits (42%). In the risk-based integrated approach, the combined costs of hypertension, diabetes, and cholesterol medications make up the largest share of the overall program cost (82%). Although the main driver of projected program costs for the integrated approach was expenditure on essential medicines and diagnostic tests, hypertension and diabetes medications contributed a relatively small portion (18%) to this expenditure, whereas cholesterol medications contributed nearly 40%. Hypertension treatment remains among the leading cost-effective ways to combat heart disease. In this study, the annual medication expenditure per patient treated with medications for hypertension, diabetes, and cholesterol was USD 17, USD 34, and USD 48, respectively.

Though based on observations gathered in one district of Bangladesh, our results are consistent with those reported by past studies. A previous study on Bangladesh by Koehlmoos et al. (2016) estimated that hypertension treatment would cost about USD 13 (BDT 1,070) per patient per year.[25] WHO (2011) has estimated the average hypertension screening cost for LMICs at approximately USD 4 for LMICs, not including treatment but including the cost of performing CVD risk assessment and BP measurement in primary care settings.[26] Haque (2016) estimated the average cost of diabetes screening in Bangladesh at approximately USD 5 (BDT 411), including glucose screening in primary care, documentation, setting up referrals, and organizing screening events but excluding treatment.[27] In this study, the cost elements in the Bangladesh HEARTS program are wide-ranging including screening, diagnosis, and treatment for multiple CVD risk conditions (hypertension, diabetes, hyperlipidemia) and counseling for CVD risk factors (tobacco use, alcohol use, and physical inactivity).

The analysis revealed that scaling up the hypertension management program within the four sub-districts would require an additional full-time equivalent of 56 doctors, 56 nurses, and 6 CHWs. Population-level scale-up of the risk-based hypertension, diabetes, and high cholesterol management program in the four sub-districts was estimated to require the full time equivalent of 63 doctors, 63 nurses, 6 CHWs, and 101 lab technicians. To put this in context, a typical 50-bed sub-district public health complex in Bangladesh employs 20 doctors, 16 nurses, and one medical assistant. Oftentimes, not all health provider posts are filled. This gap in provider capacity poses a significant barrier to program

1  
2  
3 expansion. Team-based care using task-sharing among doctors, nurses and community health workers and  
4 volunteers can accomplish the activities required by the HEARTS package more affordably, including  
5 NCD-related health promotion, prevention, screening, and patient navigation through the health system. A  
6 systematic review of intervention trials in low- and middle-income countries by Joshi et al. (2014) found  
7 that team-based care, including task sharing was effective in improving process outcomes (e.g.,  
8 hypertension and diabetes screening) and health outcomes (e.g., hypertension and diabetes control), and  
9 achieving treatment concordance with doctors.[28, 17] Krishnan et al. (2019) conducted a study on a  
10 community-based hypertension management program of blood pressure monitoring and lifestyle  
11 counselling intervention undertaken by female community health volunteers (FCHVs) in Nepal, and  
12 assessed the intervention to be highly cost-effective.[29]

13  
14  
15  
16  
17  
18 In Bangladesh, there are six tiers of public healthcare infrastructure: national, divisional, district,  
19 upazila (sub-district), union, and ward levels. The government of Bangladesh has plans to expand ‘NCD  
20 corners’ at the upazila level, and the upazila primary care setting is well-positioned to bridge the link the  
21 health care providers down to the union, ward (and community) levels by harnessing community support  
22 and delegating suitable activities under task-sharing principles.[17, 30, 31] This will enhance healthcare  
23 access among disadvantaged populations and mitigate health disparities. Further, in Bangladesh, according  
24 to the 2016 Household Income Expenditure Survey and 2014 Health and Morbidity Status Survey, one in  
25 three patients received treatment from a pharmacy or medical shop, while about one in five received  
26 treatment from public health providers.[32, 33] This emphasizes the need for partnerships with various  
27 types of public-private health providers.

28  
29  
30  
31  
32 The models of care introduced in the Bangladesh national hypertension guidelines and NCD  
33 operational plan are encouraging; however, there are capacity challenges to the scaling-up of NCD care in  
34 Bangladesh.[34, 35] The fiscal year 2021 budget allocation to the health sector stands just above 5%,  
35 which is less than 1% of GDP. Further, less than 5% of public sector funding for health covers NCDs,  
36 despite NCDs being responsible for almost two-thirds (63% in 2016) of disability-adjusted life years  
37 (DALYs) in Bangladesh.[17] The per capita NCD allocation is only USD 0.08.[17] There is a need for  
38 better coordination of non-state stakeholders in NCD control with the public sector with a stronger focus of  
39 the public sector on NCD prevention and health promotion.[17] The health sector in Bangladesh is  
40 financed 93% from domestic sources (74% out-of-pocket, 17% government health expenditure, and 3%  
41 other private sources) and 7% from external health expenditures. Domestic general government health  
42 expenditure per capita is only USD 7 (0.4% of GDP per capita).[36] Due to insufficient public sector  
43 funding, out-of-pocket expenditure for NCD care is large in Bangladesh, contributing to the  
44 impoverishment of patients and their families. Moreover, a recent policy review by Biswas et al (2017)  
45 highlights the lack of proper planning, implementation, and monitoring of NCD health initiatives.[37]  
46 However, the Bangladesh Copenhagen Project assessed the benefits of managing hypertension through  
47 targeted investment and reported a high level of return on investment (BDT 37 benefit for every BDT  
48 spent).[25]



1  
2  
3 This report has several limitations. Due to lack of data at a local level, the cost projections rely on  
4 assumptions regarding population coverage, risk factor prevalence, primary care attendance rate, and  
5 frequency of patient visits by CDV risk, which were assumed to be uniform for the four sub-districts and  
6 across age or sex groups. Similarly, unit costs of supplies, wages, and provider time allocations were  
7 assumed to be the same across sub-districts. Since the examined sub-districts are adjacent to each other,  
8 these unit costs may not be considerably different. While we used average medicine prices, they may vary  
9 in different sub-districts depending on the procurement arrangement and sources. However, in Bangladesh,  
10 the price variations are minimal or low in the public health facilities, given the medicines are procured  
11 mainly from EDCL and/or CMSD (WHO 2014<sup>19</sup>; Kasonde L et al. 2019<sup>20</sup>). The strength of the study lies  
12 in its ability to disaggregate costs by function, identifying areas for efficiency improvements, such as task-  
13 sharing and bridging program delivery from the upazila level to more localized community facilities.  
14  
15  
16  
17  
18

19 In 2018, the Government of Bangladesh introduced a multisectoral action plan for NCD  
20 prevention and control, which emphasizes NCD risk factors including tobacco use, unhealthy diet, physical  
21 inactivity, and harmful use of alcohol.[35] This study can inform approaches to scaling up this action plan  
22 nationally, with the goal of increasing population outreach for CVD prevention at the primary care level.  
23 Using the costs reported in this study for future cost-effectiveness analyses can further support evidence-  
24 based decision making for CVD prevention programs in Bangladesh.  
25  
26  
27  
28

### 29 **Disclaimer**

30 The findings and conclusions of this report are those of authors only and do not necessarily represent the official  
31 position of the Centers for Disease Control and Prevention.  
32

### 33 **Author Contribution**

34 MJH and MSH conceptualized the study, led the formal analysis, implemented the methodology and the excel-based  
35 costing tool, and wrote the draft manuscript. DK, SRC, MRB, AEM contributed to the study concept, analytical aspects,  
36 manuscript write-up and critical review. RT and SJ contributed to data collection and critical review of the manuscript.  
37 MJH, MSH, SRC, RT, SJ, and MRB contributed to data collection. All authors provided critical feedback and helped  
38 shape the research, analysis, and manuscript.  
39  
40

### 41 **Ethics Approval**

42 Ethics approval was not required because this research neither involved human or animal participation nor required  
43 consent from human participants.  
44

### 45 **Conflict of Interest**

46 The authors declare non conflict of interest  
47  
48

### 49 **Data Statement**

50 Data used in this study is included in table 1 of this article.  
51  
52

### 53 **Funding**

54 This analysis was conducted on behalf of Resolve to Save Lives, an initiative of Vital Strategies. Resolve to Save  
55 Lives is funded by grants from Bloomberg Philanthropies; the Bill and Melinda Gates Foundation; and Gates  
56 Philanthropy Partners, which is funded with support from the Chan Zuckerberg Foundation.  
57  
58

## References

1. World Health Organization. 2020. Improving hypertension control in 3 million people: country experiences of programme development and implementation. Geneva: World Health Organization; 2020.
2. World Health Organization. 2013a. A global brief on hypertension: silent killer, global public health crisis: World Health Day 2013. No. WHO/DCO/WHD/2013.2. World Health Organization, 2013.
3. GBD 2013 Risk Factors Collaborators. Global, regional, and national comparative risk assessment of 79 behavioural, environmental and occupational, and metabolic risks or clusters of risks in 188 countries, 1990-2013: a systematic analysis for the Global Burden of Disease Study 2013. *Lancet*. 2015;386:2287-2323.
4. Rapsomaniki E, Timmis A, George J, Pujades-Rodriguez M, Shah AD, Denaxas S, et al. Blood pressure and incidence of twelve cardiovascular diseases: lifetime risks, healthy life-years lost, and age-specific associations in 1·25 million people. *Lancet*. 2014;383:1899–911.
5. Vaes B, Beke E, Truyers C, Elli S, Buntinx F, Verbakel JY, et al. The correlation between blood pressure and kidney function decline in older people: a registry-based cohort study. *BMJ Open*. 2015;5:e007571.
6. Tzourio C. 2007. Hypertension, cognitive decline, and dementia: an epidemiological perspective. *Dialog Clin Neur*. 2007;9:61.
7. Bloch MJ, FASH F, Basile FJ. Cardiovascular risks of hypertension. *UpToDate*. Jan. 2018.
8. World Health Organization. 2.12. Sixty-Fifth World Health Assembly Resolutions, Decisions, Annexes. 2012 May 21–26; Available from: <http://www.who.int/mediacentre/events/2012/wha65/en/>. WHA65/2012/REC/1.
9. World Health Organization. 2013b. Global Action Plan for the Prevention and Control of Noncommunicable Diseases: 2013–2020. [online] Geneva, Switzerland: World Health Organization; 2013. Available from: [http://apps.who.int/iris/bitstream/handle/10665/94384/1/9789241506236\\_eng.pdf](http://apps.who.int/iris/bitstream/handle/10665/94384/1/9789241506236_eng.pdf)
10. World Health Organization. 2014. Global status report on noncommunicable diseases 2014 (No. WHO/NMH/NVI/15.1). World Health Organization.
11. World Health Organization. 2020a. Thirteenth General Programme of Work (GPW13): methods for impact measurement. Geneva: World Health Organization; 2020. Available from: <file:///C:/Research/Bangladesh%20HEARTS%20Costing%20tool/gpw13-methodology-nov9-online-version.pdf>
12. United Nations. (2015). Transforming our world: The 2030 agenda for sustainable development. General Assembly 70 session.
13. Riaz BK, Islam MZ, Islam ANMS, Zaman MM, Hossain MA, Rahman MM, Khanam F, K, Amin KMB, Noor IN. Risk factors for non-communicable diseases in Bangladesh: findings of the population-based cross-sectional national survey 2018. *BMJ Open* 2020;10:e041334. doi:10.1136/bmjopen-2020-041334

14. Chowdhury, M. Z. I., Rahman, M., Akter, T., Akhter, T., Ahmed, A., Shovon, M. A., ... & Turin, T. C. (2020). Hypertension prevalence and its trend in Bangladesh: evidence from a systematic review and meta-analysis. *Clinical Hypertension*, 26, 1-19.
15. World Health Organization. 2018. Country Office for Bangladesh. National STEPS survey for non-communicable diseases risk factors in Bangladesh 2018. World Health Organization. Country Office for Bangladesh. <https://apps.who.int/iris/handle/10665/332886>.
16. Alam, B. B., Koziel, A., Fraser-Hurt, N., Shubber, Z., Olabiran, A. F., & Mamza, J. B. (2019). Hypertension and Type-2 Diabetes in Bangladesh: Continuum of Care Assessment and Opportunities for Action (No. 126906, pp. 1-88). The World Bank.
17. The World Bank. (2019). Hypertension and Type-2 Diabetes in Bangladesh: Continuum of Care Assessment and Opportunities for Action. Washington DC: World Bank.
18. World Health Organization. (2020b). Hearts: technical package for cardiovascular disease management in primary health care.
19. World Health Organization. 2016. HEARTS: technical Package for Cardiovascular Disease Management in Primary Health Care. Geneva, Switzerland: World Health Organization; 2016. Available from: <https://apps.who.int/iris/bitstream/handle/10665/252661/9789241511377-en...>
20. World Health Organization. 2014. MEDICINES IN HEALTH CARE DELIVERY BANGLADESH Situational Analysis: 13 – 25 September 2014 Report prepared using the WHO/SEARO workbook tool for undertaking a situational analysis of medicines in health care delivery in low and middle income countries. World Health Organization, Regional Office for South East Asia, New Delhi, India.
21. Kasonde, L., Tordrup, D., Naheed, A., Zeng, W., Ahmed, S., & Babar, Z. U. D. (2019). Evaluating medicine prices, availability and affordability in Bangladesh using World Health Organisation and Health Action International methodology. *BMC health services research*, 19, 1-12.
22. Husain, M. J., Allaire, B. T., program: An application Hutchinson, B., Ketgudee, L., Srisuthisak, S., Yueayai, K., ... & Kostova, D. (2020). Assessing costs of a hypertension management of the HEARTS costing tool in a program planning workshop in Thailand. *The Journal of Clinical Hypertension*, 22(1), 111-117.
23. Glasgow, Russell E., Seth Emont, and Doriane C. Miller. "Assessing delivery of the five 'As' for patient-centered counseling." *Health Promotion International* 21.3 (2006): 245-255.
24. Whitlock, E. P., Orleans, C. T., Pender, N., & Allan, J. (2002). Evaluating primary care behavioral counseling interventions: an evidence-based approach. *American journal of preventive medicine*, 22(4), 267-284.
25. Koehlmoos T et al. (2016). Controlling the Burden of Non-Communicable Diseases in Bangladesh: Benefit-cost Analysis of Prevention Policies and Interventions: Bangladesh priorities.
26. World Health Organization. 2011. Scaling up action against non-communicable diseases: how much will it cost? ISBN 978 92 4 150231 3
27. Haque R (2016). Costs and Benefits of addressing Diabetes and Smokeless Tobacco Consumption via Community Clinics. Bangladesh Priorities, Copenhagen Consensus Center, 2016. License: Creative Commons Attribution CC BY 4.0.

- 1
  - 2
  - 3
  - 4
  - 5
  - 6
  - 7
  - 8
  - 9
  - 10
  - 11
  - 12
  - 13
  - 14
  - 15
  - 16
  - 17
  - 18
  - 19
  - 20
  - 21
  - 22
  - 23
  - 24
  - 25
  - 26
  - 27
  - 28
  - 29
  - 30
  - 31
  - 32
  - 33
  - 34
  - 35
  - 36
  - 37
  - 38
  - 39
  - 40
  - 41
  - 42
  - 43
  - 44
  - 45
  - 46
  - 47
  - 48
  - 49
  - 50
  - 51
  - 52
  - 53
  - 54
  - 55
  - 56
  - 57
  - 58
  - 59
  - 60
28. Joshi R, Alim M, Kengne AP, Jan S, Maulik PK, Peiris D, et al. Task shifting for non-communicable disease management in low and middle income countries--a systematic review. *PloS one*. 2014;9(8):e103754. Epub 2014/08/15. doi: 10.1371/journal.pone.0103754.
29. Krishnan, A., Finkelstein, E. A., Kallestrup, P., Karki, A., Olsen, M. H., & Neupane, D. (2019). Cost-Effectiveness and budget impact of the community-based management of hypertension in Nepal study (COBIN): a retrospective analysis. *The Lancet Global Health*, 7(10), e1367-e1374.
30. Rawal, L. B., Kanda, K., Biswas, T., Tanim, M. I., Poudel, P., Renzaho, A. M., ... & Ahmed, S. M. (2019). Non-communicable disease (NCD) corners in public sector health facilities in Bangladesh: a qualitative study assessing challenges and opportunities for improving NCD services at the primary healthcare level. *BMJ open*, 9(10), e029562.
31. Directorate General of Health Services (2020). Health Bulletin 2019. Management Information System, Director General of Health Services, Ministry of Health and Family Welfare, Government of the People's Republic of Bangladesh.
32. Bangladesh Bureau of Statistics (BBS). 2017. Preliminary report on Household Income and Expenditure Survey 2016. Statistics and Informatics Division (SID), Ministry of Planning. Government of the People's Republic of Bangladesh.
33. Bangladesh Bureau of Statistics (BBS). 2015. Report on Health and Morbidity Status Survey 2014. Statistics and Informatics Division (SID), Ministry of Planning. Government of the People's Republic of Bangladesh.
34. World Health Organization. 2013. National guidelines for management of hypertension in Bangladesh.
35. Director General of Health Services. DGHS. 2018. Multi-sectoral action plan for prevention and control of non-communicable diseases 2018-2025. (2018). Dhaka: Non-communicable Disease Control Programme, Directorate General of Health Services.
36. WHO Global Health Expenditure Database (<https://apps.who.int/nha/database/ViewData/Indicators/en>).
37. Biswas, T., Pervin, S., Tanim, M.I.A. et al. Bangladesh policy on prevention and control of non-communicable diseases: a policy analysis. *BMC Public Health* 17, 582 (2017). <https://doi.org/10.1186/s12889-017-4494-2>.

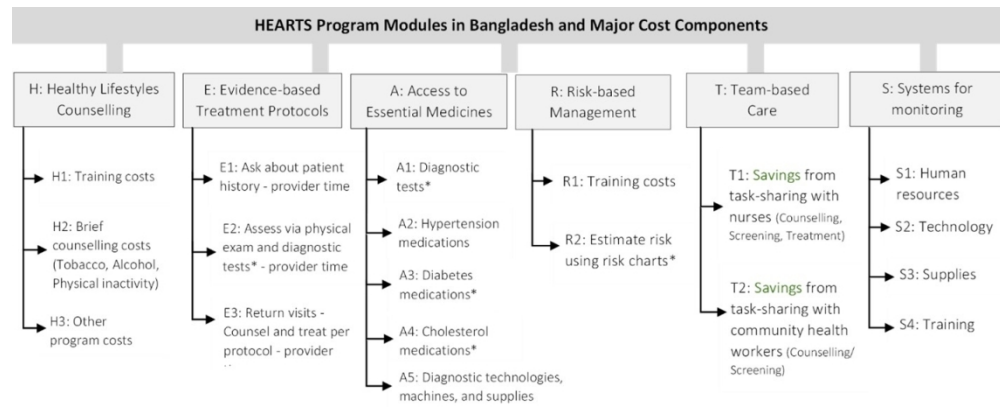

Figure 1: Cost components of HEARTS program in Bangladesh

Note: \* These cost components are included in the risk-based integrated hypertension, diabetes, and cholesterol program.

165x67mm (220 x 220 DPI)

1  
2  
3  
4  
5  
6  
7  
8  
9  
10  
11  
12  
13  
14  
15  
16  
17  
18  
19  
20  
21  
22  
23  
24  
25  
26  
27  
28  
29  
30  
31  
32  
33  
34  
35  
36  
37  
38  
39  
40  
41  
42  
43  
44  
45  
46  
47  
48  
49  
50  
51  
52  
53  
54  
55  
56  
57  
58  
59  
60

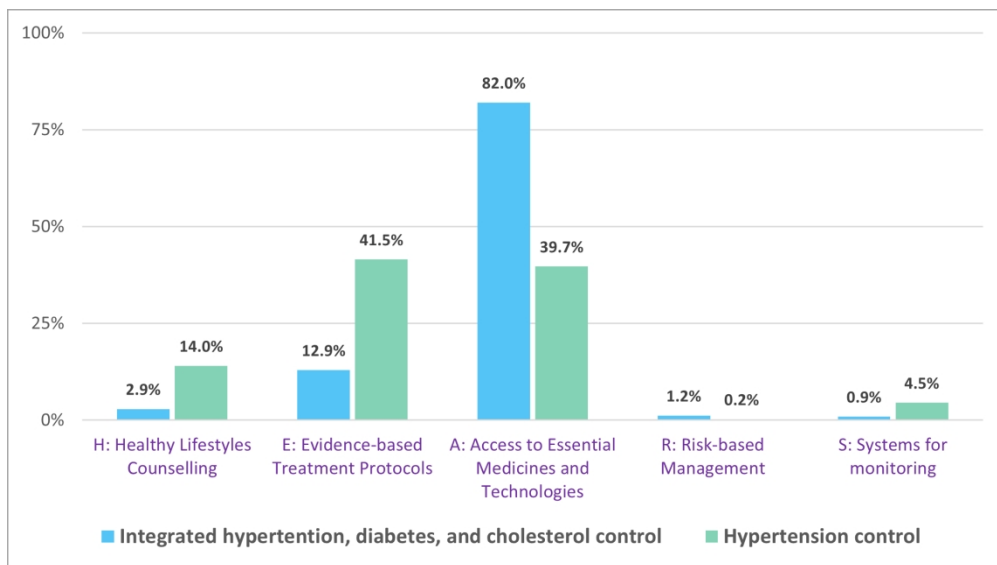

Figure 2: Distribution of annual cost by HEARTS components

419x235mm (130 x 130 DPI)

# BMJ Open

## Cost of primary care approaches for hypertension management and risk-based cardiovascular disease prevention in Bangladesh

|                                 |                                                                                                                                                                                                                                                                                                                                                                                                                                                                                                                                                                                                                                                                                                                                                                                                                                                                                                                                           |
|---------------------------------|-------------------------------------------------------------------------------------------------------------------------------------------------------------------------------------------------------------------------------------------------------------------------------------------------------------------------------------------------------------------------------------------------------------------------------------------------------------------------------------------------------------------------------------------------------------------------------------------------------------------------------------------------------------------------------------------------------------------------------------------------------------------------------------------------------------------------------------------------------------------------------------------------------------------------------------------|
| Journal:                        | <i>BMJ Open</i>                                                                                                                                                                                                                                                                                                                                                                                                                                                                                                                                                                                                                                                                                                                                                                                                                                                                                                                           |
| Manuscript ID                   | bmjopen-2022-061467.R1                                                                                                                                                                                                                                                                                                                                                                                                                                                                                                                                                                                                                                                                                                                                                                                                                                                                                                                    |
| Article Type:                   | Original research                                                                                                                                                                                                                                                                                                                                                                                                                                                                                                                                                                                                                                                                                                                                                                                                                                                                                                                         |
| Date Submitted by the Author:   | 10-May-2022                                                                                                                                                                                                                                                                                                                                                                                                                                                                                                                                                                                                                                                                                                                                                                                                                                                                                                                               |
| Complete List of Authors:       | Husain, Muhammad ; Centers for Disease Control and Prevention, Division of Global Health Protection, Centers for Global Health Haider, Mohammad; Ministry of Health and Family Welfare, Directorate General of Health Services<br>Tarannum, Renesa; National Heart Foundation Hospital & Research Institute, Department of Epidemiology and Research<br>Jubayer, Shamim; National Heart Foundation Hospital & Research Institute, Department of Epidemiology and Research<br>Bhuiyan, Mahfuzur ; National Heart Foundation Hospital and Research Institute, Department of Epidemiology and Research<br>Kostova, Deliana; Centers for Disease Control and Prevention, Division of Global Health Protection, Centers for Global Health<br>Moran, Andrew ; Resolve to Save Lives, an initiative of Vital Strategies<br>Choudhury, Sohel Reza; National Heart Foundation Hospital & Research Institute, Department of Epidemiology & Research |
| <b>Primary Subject Heading</b>: | Health economics                                                                                                                                                                                                                                                                                                                                                                                                                                                                                                                                                                                                                                                                                                                                                                                                                                                                                                                          |
| Secondary Subject Heading:      | Health services research, Cardiovascular medicine, Evidence based practice, Global health                                                                                                                                                                                                                                                                                                                                                                                                                                                                                                                                                                                                                                                                                                                                                                                                                                                 |
| Keywords:                       | Hypertension < CARDIOLOGY, HEALTH ECONOMICS, International health services < HEALTH SERVICES ADMINISTRATION & MANAGEMENT, PUBLIC HEALTH                                                                                                                                                                                                                                                                                                                                                                                                                                                                                                                                                                                                                                                                                                                                                                                                   |
|                                 |                                                                                                                                                                                                                                                                                                                                                                                                                                                                                                                                                                                                                                                                                                                                                                                                                                                                                                                                           |

SCHOLARONE™  
Manuscripts



I, the Submitting Author has the right to grant and does grant on behalf of all authors of the Work (as defined in the below author licence), an exclusive licence and/or a non-exclusive licence for contributions from authors who are: i) UK Crown employees; ii) where BMJ has agreed a CC-BY licence shall apply, and/or iii) in accordance with the terms applicable for US Federal Government officers or employees acting as part of their official duties; on a worldwide, perpetual, irrevocable, royalty-free basis to BMJ Publishing Group Ltd ("BMJ") its licensees and where the relevant Journal is co-owned by BMJ to the co-owners of the Journal, to publish the Work in this journal and any other BMJ products and to exploit all rights, as set out in our [licence](#).

The Submitting Author accepts and understands that any supply made under these terms is made by BMJ to the Submitting Author unless you are acting as an employee on behalf of your employer or a postgraduate student of an affiliated institution which is paying any applicable article publishing charge ("APC") for Open Access articles. Where the Submitting Author wishes to make the Work available on an Open Access basis (and intends to pay the relevant APC), the terms of reuse of such Open Access shall be governed by a Creative Commons licence – details of these licences and which [Creative Commons](#) licence will apply to this Work are set out in our licence referred to above.

Other than as permitted in any relevant BMJ Author's Self Archiving Policies, I confirm this Work has not been accepted for publication elsewhere, is not being considered for publication elsewhere and does not duplicate material already published. I confirm all authors consent to publication of this Work and authorise the granting of this licence.



## Cost of primary care approaches for hypertension management and risk-based cardiovascular disease prevention in Bangladesh

Muhammad Jami Husain<sup>1\*</sup>, Mohammad Sabbir Haider<sup>2</sup>, Renesa Tarannum<sup>3</sup>, Shamim Jubayer<sup>3</sup>, Mahfuzur Rahman Bhuiyan<sup>3</sup>, Deliana Kostova<sup>1</sup>, Andrew E. Moran<sup>4</sup>, Sohel Reza Choudhury<sup>3</sup>

<sup>1</sup> Division of Global Health Protection, Centers for Global Health, Centers for Disease Control and Prevention, Atlanta, USA

<sup>2</sup> Directorate General of Health Services, Ministry of Health and Family Welfare, Dhaka, Bangladesh

<sup>3</sup> Department of Epidemiology and Research, National Heart Foundation Hospital & Research Institute, Dhaka, Bangladesh

<sup>4</sup> Resolve to Save Lives, an initiative of Vital Strategies, New York, USA.

\* Corresponding author: Muhammad Jami Husain, PhD. Email: [mhusain@cdc.gov](mailto:mhusain@cdc.gov)

### Abstract

**Objective:** To estimate the costs of scaling up the HEARTS pilot project for hypertension management and risk-based cardiovascular disease prevention at the full population level in the four sub-districts (upazilas) in Bangladesh.

**Settings:** Two intervention scenarios in sub-district health complexes: hypertension management only, and risk-based integrated hypertension, diabetes, and cholesterol management.

**Design:** Data obtained during July-August 2020 from sub-district health complexes on the cost of medications, diagnostic materials, staff salaries, and other program components.

**Methods:** Program costs were assessed using the HEARTS costing tool, an Excel-based instrument to collect, track, and evaluate the incremental annual costs of implementing the HEARTS program from the health system perspective.

**Primary and secondary outcome measures:** Program cost, provider time.

**Results:** The total annual cost for the hypertension control program was estimated at USD 3.2 million, equivalent to USD 2.8 per capita or, USD 8.9 per eligible patient. The largest cost share (USD 1.35 million; 43%) was attributed to the cost of medications, followed by the cost of provider time to administer treatment (38%). The total annual cost of the risk-based integrated management program was projected at USD 14.4 million, entailing USD 12.9 per capita or USD 40.2 per eligible patient. The estimated annual costs per patient treated with medications for hypertension, diabetes, and cholesterol were USD 18, USD 29, and USD 37, respectively.

**Conclusion:** Expanding the HEARTS hypertension management and CVD prevention program to provide services to the entire eligible population in the catchment area may face constraints in physician capacity. A task-sharing model involving shifting of select tasks from doctors to nurses and local community health workers would be essential for the eventual scale-up of primary care services to prevent CVD in Bangladesh.

**Key Words:** Program cost; HEARTS hypertension management and CVD prevention program; scale-up of primary care services; Bangladesh.

**Word Count:** 4429

### Strengths and limitations of this study

- The study assesses the costs of scaling up two program scenarios at the full population level in the four sub-districts in Bangladesh: a hypertension management program and an integrated risk-based hypertension, diabetes, and cholesterol management program.
- Program costs were assessed using the HEARTS costing tool, an Excel-based instrument to collect, track, and evaluate the incremental annual costs of implementing the HEARTS program from the health system perspective.
- The study disaggregates costs by function, identifying areas for efficiency improvements, such as task-sharing and bridging program delivery from the upazila level to more localized community facilities.
- Due to lack of data at a local level, the cost projections rely on assumptions regarding population coverage, risk factor prevalence, primary care attendance rate, distribution of CVD risk among patients, distribution of patients by treatment protocols, and frequency of patient visits by CVD risk.

## 1. BACKGROUND

Hypertension is a major and preventable risk factor for cardiovascular disease (CVD). An estimated 1.13 billion people (1 in 4 men and 1 in 5 women) worldwide have hypertension. [1] Among people with hypertension worldwide, fewer than 1 in 5 have it under control.[1] High blood pressure is a leading global risk factor for premature death and disability, accounting for about 10 million (or 1 in 6) deaths worldwide each year.[2, 3] Uncontrolled hypertension significantly increases the risk of stroke, myocardial infarction, heart failure, dementia, renal failure, retinopathy, and other diseases.[4-7] Almost half of all CVD events are attributable to uncontrolled hypertension.[2, 3]

Reducing the prevalence of hypertension is a standing global health objective.[8-11] This objective complements the 2030 Sustainable Development Goal (SDG) of reducing premature deaths from noncommunicable diseases (NCDs) by 25%.[12] Low- and middle-income countries (LMICs), where two-thirds of all hypertension cases reside, are increasingly cognizant of the long-term benefits of addressing hypertension in their populations. However, implementing population-level measures targeting hypertension may present challenges for many LMICs where health systems have traditionally focused on infectious diseases and where the capacity for NCD care may be limited.

Bangladesh is among lower-middle-income countries with a high burden of hypertension. In 2018, the prevalence of elevated blood pressure (SBP and/or DBP  $\geq$  140/90 mmHg) among adults in Bangladesh was 21%.[13-15]. According to the 2011 Bangladesh National Demographic and Health Survey, of 14.4 million hypertensive people, only 7.3 million (51%) were aware of their condition, 41% were treated, and 18% had their blood pressure levels under control.[16] The burden of hypertension in Bangladesh is expected to grow alongside increased population aging, rapid urbanization with commensurate increases in sedentary lifestyle and processed food consumption, and other socio-economic and lifestyle changes. However, only less than 5 percent of the health sector program budget is allocated for NCDs control.[17] This demonstrates the need for an effective, low-cost and efficient population-level approach in addressing hypertension.

In 2016, WHO introduced the HEARTS technical package as a framework for CVD prevention at the primary care level.[18] The HEARTS technical package consists of guidelines for implementing a primary-care approach to CVD management, focusing on screening and management of CVD risk factors, including lifestyle modification and pharmacological treatment of metabolic risk factors such as hypertension, diabetes, and hyperlipidemia. In this paper, we describe the local budgetary impact of implementing the HEARTS program at the population level for four sub-districts in Bangladesh, based on program cost data obtained from a representative health care facility in each sub-district. Although the

1  
2  
3 initial focus of the program in the four sub-districts is presently limited to hypertension control, scaling-up  
4 of the initiative may include screening, diagnosis, and treatment of diabetes and high cholesterol.  
5  
6 Understanding the cost drivers of CVD prevention approaches in the Bangladesh primary care system can  
7  
8 support budgeting, procurement, evaluation, and planning for scale-up.  
9

## 10 **2. METHODS**

### 11 *2.1. Setting*

12  
13  
14  
15 In 2018, the Directorate General of Health Services and the National Heart Foundation of Bangladesh  
16 collaborated with Resolve to Save Lives (RTSL, an initiative of Vital Strategies, a non-profit global public  
17 health organization) to implement a pilot program to strengthen the detection, treatment, and follow-up  
18 management of hypertension in primary care. The program was introduced in four health complexes in four  
19 sub-districts (upazilas) in the Sylhet district: Golapganj, Fenchuganj, Beanibazar, and Bishwanath. In  
20 Bangladesh, hospitals and health facilities that are in the sub-district (upazila) level or below are termed as  
21 primary health complexes. A typical upazila health complex is a 50-bed hospital with service coverage in  
22 the range of 100,000 to 400,000 population and plays a pivotal role in the provision of primary health care  
23 through a three-tier system consisting of the ward level, union level, and upazila level. The upazila health  
24 complex, performs a wide range of functions that includes prevention, promotion, treatment (in-patient,  
25 out-patient, limited diagnostic services), management, technical support, training, coordination, and patient  
26 referral services. The outpatient service is usually staffed with five outpatient general practitioners  
27 including 1 resident medical officer, 2 medical officers, and 2 medical assistants. An ‘NCD corner’ was set-  
28 up in the outpatient with necessary logistics and personnel for screening and treatment. We project program  
29 costs under two intervention scenarios: a hypertension-focused program, and a risk-based integrated  
30 hypertension, diabetes, and cholesterol management program.  
31  
32  
33  
34  
35  
36  
37  
38  
39  
40

### 41 *2.2. Patient and Public Involvement*

42  
43  
44 Patients or the public were not involved in the design, conduct, reporting, or dissemination plans of  
45 this research.  
46  
47

### 48 *2.3. Hypertension management program*

49  
50  
51 The HEARTS Technical Package for CVD prevention in primary care is organized around six  
52 modules: H—Healthy-lifestyle counselling, E—Evidence-based treatment protocols, A—Access to essential  
53 medicines and technology, R—Risk-based CVD management, T—Team-based Care, and S—Systems for  
54 monitoring.[19] Components of these modules are described in Figure 1. In the four upazila primary care  
55  
56  
57  
58  
59  
60

1  
2  
3 complexes in Bangladesh, programmed activities included: training of staff in following a standard treatment  
4 protocol, record keeping and reporting; ensuring adequate supply of necessary drugs; community outreach  
5 to increase awareness of the need for hypertension screening; introduction of patient monitoring tools and a  
6 monthly reporting system; and establishing a mechanism for patient referral from primary care to secondary  
7 care and tertiary care at MAG Osmani Medical College. The clinical management protocol for adults with  
8 hypertension (defined as SBP/DBP  $\leq$  140/90 mmHg, or SBP/DBP  $\leq$  130/80 mmHg with co-morbidity or  
9 high CVD-risk) entailed a first line of treatment with amlodipine 5mg daily; a second line of treatment using  
10 amlodipine 5mg plus losartan 50mg daily; and a third line of treatment using amlodipine 5mg plus losartan  
11 50mg plus hydrochlorothiazide 12.5mg daily. Appendix 1 depicts the hypertension treatment protocol. The  
12 prescribed medicines are typically obtained by public health facilities, generic, domestically manufactured,  
13 and provided free of charge to patients. The national drug policy recommends that 70% of the public sector  
14 medicines be purchased from the state-owned Essential Drug Company Limited (EDCL), 25% from the  
15 Central Medical Stores Depot (CMSD), and 5% from local sources.[20, 21] In order to provide continuous  
16 care more sustainably and to reduce burden on physicians, a team-based care strategy was implemented. The  
17 healthcare providers were trained to acquire the necessary skills to provide brief interventions to record  
18 patients' medical history, measuring blood pressure (BP), point-of-care testing to assess fasting blood glucose  
19 and cholesterol levels and urine dipstick for proteinuria, encourage behavior change, assess CVD risk, or  
20 initiate treatment protocol. The training sessions were conducted in one set-up with a pool of selected doctors,  
21 nurses, and community health workers trained with relevant modules. In this approach, community health  
22 workers (CHW) were trained to provide counselling and some screening services along with the doctors and  
23 nurses. For the costing estimate, equal burden sharing in terms of provider time was assumed.

#### 24 25 26 27 28 29 30 31 32 33 34 35 36 37 38 39 40 41 42 43 44 45 46 47 48 49 50 51 52 53 54 55 56 57 58 59 60 *2.4. Risk-based integrated hypertension, diabetes, and hyperlipidemia management program*

To further strengthen CVD prevention, the HEARTS program in Bangladesh also planned to  
integrate diabetes and hyperlipidemia management in addition to hypertension management in primary care  
patients. The program entails assessment of target population by total CVD risk estimation to categorize  
their risk for CVD. The risk-stratification is based on WHO and International Society of Hypertension  
cardiovascular risk prediction charts and expressed as the probability of developing CVD over 10 years:  
low CVD risk (0 to  $<$ 10%); medium CVD risk (10 to 20%); and high CVD risk ( $\geq$ 20%).[22] The  
treatment protocol for patients with uncomplicated type 2 diabetes (defined as fasting plasma glucose  
(FPG)  $\geq$  7.0 mmol/l or routine plasma glucose (RPG)  $\geq$  11.1 mmol/l or HbA1C  $\geq$  6.5%) managed at the  
primary care level included Metformin (500 mg), Metformin (1000 mg), then Metformin (1000 mg) and  
Gliclazide (80 mg) as the first, second, and third lines of treatments, respectively. The protocol is based on  
the WHO guidance on diagnosis, classification, and management of diabetes (HEARTS - D), which is

1  
2  
3 aligned with the WHO Package of Essential Noncommunicable Disease Interventions in Primary Health  
4 Care (WHO-PEN).[23] For managing plasma lipid levels (i.e., high cholesterol), the use of statins as the  
5 primary therapy is widely recommended, however, the WHO is yet to offer any specific guidance.[24] For  
6 costing, the local consultants and experts proposed a statin based treatment protocol for hyperlipidemia  
7 including simvastatin (10 mg) as first, atorvastatin (20 mg) as second, and atorvastatin (40 mg) as the third  
8 line of treatment. Costs associated with implementing integrated hypertension, diabetes, and  
9 hyperlipidemia treatment protocols include provider time spent on estimating CVD risk using risk charts  
10 during an annual primary care visit; training in CVD risk estimation, in addition to time spent collecting  
11 patient history; medication costs; and diagnostic test costs including provider (technician) time, complete  
12 blood count panel, fasting blood glucose, and blood lipid panel tests.  
13  
14  
15  
16  
17  
18

### 19 20 *2.5. HEARTS Costing Tool*

21  
22 Program costs were assessed using the HEARTS costing tool, an Excel-based instrument to collect,  
23 track, and evaluate the incremental annual cost of implementing the HEARTS program from the health  
24 system perspective. The tool is organized by HEARTS modules.[25] In July-August 2020, we obtained unit  
25 costs from four upazila complexes and used these to project annual resource needs for implementing the  
26 CVD prevention program at the sub-district population level. The researchers completed in-person  
27 collection of data from the four facilities on human resource and time costs, diagnostic prices, time-motion  
28 on laboratory diagnostics, market price of medicines, and others.  
29  
30  
31  
32  
33

34 Figure 1 shows major cost categories within HEARTS modules. Once program costs and other inputs  
35 such as population coverage, risk factor prevalence, and planned provider numbers were entered into the  
36 costing tool, the cost calculations were allocated across different HEARTS modules.  
37  
38  
39

#### 40 **Figure 1: Cost components of the HEARTS program in Bangladesh**

41  
42 The cost elements in the Healthy-lifestyle counselling module 'H' included costs of training  
43 providers in lifestyle counseling and costs of community awareness programs and training. Counselling is  
44 based on the '5 As' (Assess, Advise, Agree, Assist, Arrange) model, which is an evidence-based approach  
45 for promoting healthy behavioral changes to prevent NCD risk factors.[26, 27] Total provider time to  
46 administer brief counseling was equal to the average time that the health provider spends to counsel a  
47 patient to change behavior multiplied by the total number of patients who would receive counselling. The  
48 cost of total provider time was calculated as the total provider time, multiplied by the weighted average  
49 salary of the health providers who have been trained to provide counselling.  
50  
51  
52  
53  
54  
55  
56  
57  
58  
59  
60



1  
2  
3 The cost elements in Module 'E' included provider time devoted to assessing patient history,  
4 conducting physical exams and diagnostic tests, and return visits. The costs of diagnostic tests (complete  
5 blood count panel, blood lipid panel, fasting blood glucose), medications (hypertension, diabetes, and  
6 cholesterol), and on-site diagnostic technologies and supplies were assessed under Module 'A'. Module 'R'  
7 reports the costs of training providers in conducting risk-based management and the cost of provider time  
8 for estimating patient CVD risk using risk charts. Module "T" reports cost savings from task-sharing by  
9 comparing the cost that could have been incurred if the tasks were performed solely by the physicians with  
10 costs incurred through task-sharing among physicians, nurses, and CHW. Therefore, in the baseline  
11 scenario (i.e., in the absence of task-sharing allocation), the costing tool assumes a physician-led program.  
12 In our cost projections, we assumed that doctors, nurses, and CHWs will equally share the tasks (i.e.,  
13 provider time) when applicable. For instance, CHWs would only provide behavioral counselling and  
14 screening service, but they would not assess CVD risk (using risk-chart), or prescribe patients with  
15 pharmacologic treatments. Accordingly, the provider time allocated for behavior counselling and screening  
16 will be shared equally among doctors, nurses, and CHWs. Nurses will be trained to do major tasks (i.e.,  
17 counselling, screening, and assessing CVD risk, and treating according to CVD risk), therefore providers'  
18 time for performing HTN/CVD risk-assessment, prescribing suitable treatment, and return-visits were  
19 allocated equally between doctors and nurses. While the 'T' module reports the cost savings from team-  
20 based care, The accrued cost of provider time (inclusive of doctors, nurses, and CHWs) spent on various  
21 tasks is included in the corresponding 'H', 'E', and 'R' modules. Module 'S' reports costs related to human  
22 resources, technology (software and hardware), supplies, and training for patient monitoring.  
23  
24  
25  
26  
27  
28  
29  
30  
31  
32  
33  
34

## 35 2.6. Data

36  
37  
38 Data on salaries of government healthcare providers and program staff were collected from in-person  
39 interviews and/or records. Total salary was calculated according to the Government of Bangladesh National  
40 pay scale. Size of the population in the examined sub-districts was obtained from census and imputed based  
41 on Bangladesh Bureau of Statistics (BBS) estimates. Other population parameters (e.g., primary care  
42 attendance rate and risk factor prevalence) were obtained from the nationally representative NCD Risk  
43 Factor Survey 2018.[15] Medicine prices were collected from the medicine outlets in the public hospitals.  
44 The unit prices represent the average price of domestically manufactured generic medicines procured by  
45 health facilities from EDCL or CMSD. Prices of laboratory diagnostics were collected from diagnostic labs  
46 at the district (Sylhet district) and sub-district (upazila) levels. Data on time needed to conduct laboratory  
47 tests were collected from in-person interviews of laboratory personnel. Training data, including number of  
48 training and participants, per-diem costs of staff, costs related to rent, transport, refreshments, and other  
49 logistics, were collected from the respective project records.  
50  
51  
52  
53  
54  
55  
56  
57  
58  
59  
60

Table 1 presents the prevalence of CVD risk factors as well as cost inputs used to populate the HEARTS costing tool. The leading risk factors were tobacco use (43.7%), hyperlipidemia (28.4%) and hypertension (21%), followed by physical inactivity (12.3%), diabetes (8.3%) and alcohol consumption (4.4%).; The primary care attendance rate was assumed to be 47.9% in each upazila.[15] The distributions of patients by CVD risks and for the pharmacological treatment of hypertension, diabetes, and cholesterol by different treatment lines were adopted from the literature and/or based on local physician consensus. [28, 29, 30, 31] Local currency was converted to US dollars using the Bangladesh Bank official conversion rate in June 2020.

**Table 1: Costing inputs and unit costs**

| Input Description                                                      | Units            | Value              |
|------------------------------------------------------------------------|------------------|--------------------|
| <b>Eligible population (Adult population (18+))</b>                    |                  |                    |
| - Golapganj                                                            | Persons          | 261098             |
| - Fenchuganj                                                           | Persons          | 86503              |
| - Beanibazar                                                           | Persons          | 209454             |
| - Bishwanath                                                           | Persons          | 192075             |
| <b>Primary healthcare attendance rate (annual)</b>                     | Percent          | 47.9%              |
| <b>Adult population with risk factors</b>                              |                  |                    |
| - Use of tobacco products                                              | Percent          | 43.7%              |
| - Hazardous or harmful use of alcohol                                  | Percent          | 1.3%               |
| - Physical inactivity                                                  | Percent          | 29.1%              |
| - Hypertension ( $\geq 140/90$ mmHg)                                   | Percent          | 21.0%              |
| - Diabetes ( $\geq 7.0$ mmol/L or 126 mg/dl)                           | Percent          | 8.3%               |
| - Hyperlipidemia ( $\geq 6$ mmol/L or 190 mg/dl)                       | Percent          | 28.4%              |
| - Low CVD risk (0 to <10%)                                             | Percent          | 85.1%              |
| - Medium CVD risk (10 to <20%)                                         | Percent          | 14.4%              |
| - High CVD risk ( $\geq 20\%$ )                                        | Percent          | 0.5%               |
| <b>Annual wage (in LCU (BDT) and USD, including benefits)</b>          |                  |                    |
| - Doctors                                                              | BDT (USD)/year   | 1,399,452 (16,484) |
| - Nurses                                                               | BDT (USD)/year   | 726,360 (8,555)    |
| - CHWs                                                                 | BDT (USD)/year   | 486,568 (5,731)    |
| - Lab technicians                                                      | BDT (USD)/year   | 576,720 (6,793)    |
| - Accountant                                                           | BDT (USD)/year   | 576,720 (6,793)    |
| - Administrative Assistant                                             | BDT (USD)/year   | 446,242 (5,256)    |
| - Clerical Officer                                                     | BDT (USD)/year   | 446,242 (5,256)    |
| - Custodian                                                            | BDT (USD)/year   | 446,242 (5,256)    |
| - IT Personnel                                                         | BDT (USD)/year   | 446,242 (5,256)    |
| - Program Director                                                     | BDT (USD)/year   | 1,399,452 (16,484) |
| - Program Manager                                                      | BDT (USD)/year   | 726,300 (8,555)    |
| - Secretary                                                            | BDT (USD)/year   | 446,242 (5,256)    |
| - Security officer                                                     | BDT (USD)/year   | 400,196 (4,714)    |
| - Pharmacist/Chemist                                                   | BDT (USD)/year   | 576,720 (6,793)    |
| - Statistician                                                         | BDT (USD)/year   | 576,720 (6,793)    |
| - Supplies manager                                                     | BDT (USD)/year   | 486,568 (5,731)    |
| <b>Purchasing price (in LCU (BDT) and USD) of pharmaceutical drugs</b> |                  |                    |
| <i>Hypertension Medicine</i>                                           |                  |                    |
| - amlodipine 5mg                                                       | BDT (USD)/tablet | 1 (0.012)          |
| - losartan 50mg                                                        | BDT (USD)/tablet | 8 (0.094)          |
| - hydrochlorothiazide                                                  | BDT (USD)/tablet | 0.35 (0.004)       |
| <i>Diabetes Medicine</i>                                               |                  |                    |
| - metformin 500mg                                                      | BDT (USD)/tablet | 4 (0.047)          |
| - metformin 1000mg                                                     | BDT (USD)/tablet | 9 (0.106)          |
| - gliclazide                                                           | BDT (USD)/tablet | 3.5 (0.041)        |
| <i>Cholesterol Medicine</i>                                            |                  |                    |
| - simvastatin 10mg                                                     | BDT (USD)/tablet | 7 (0.082)          |
| - atorvastatin 20mg                                                    | BDT (USD)/tablet | 10 (0.118)         |
| - atorvastatin 40mg                                                    | BDT (USD)/tablet | 28 (0.330)         |
| <b>Purchasing price (in LCU) of diagnostic tests</b>                   |                  |                    |
| - Diabetes (Complete blood count - panel)                              | BDT (USD)/test   | 400 (4.71)         |
| - Diabetes (Fasting blood glucose)                                     | BDT (USD)/test   | 120 (1.41)         |



|                                                                                                |                    |              |
|------------------------------------------------------------------------------------------------|--------------------|--------------|
| - Diabetes and Cholesterol (Blood lipid panel)                                                 | BDT (USD)/test     | 800 (9.42)   |
| <b>Counselling patients to change behavior</b>                                                 |                    |              |
| - Time to counsel a patient to change behavior                                                 | Minutes            | 10           |
| - # of 'How to quit' informational materials disseminated per person, annually (print)         | Print              | 5            |
| - Cost of 'How to quit' informational materials, per unit (print materials)                    | BDT (USD)/print    | 20 (0.24)    |
| <b>LCU to USD exchange rate</b>                                                                |                    |              |
| "Safety stock" required to be on hand for medicines                                            | BDT/USD            | 84.9         |
| <b>Number of health providers in need of training</b>                                          | Percent            | 3.0          |
| - Counsel patients to change behavior                                                          | Persons            | 30           |
| - Assess patients' total CVD risk                                                              | Persons            | 10           |
| <b>Training to counsel patients to change behavior (5A's)*</b>                                 |                    |              |
| - Classroom size                                                                               | Persons            | 30           |
| - Hours of training needed                                                                     | Persons            | 16           |
| <b>Training to screen/diagnosis/treat patients Hypertension/CVD patients</b>                   |                    |              |
| - Classroom size                                                                               | Persons            | 30           |
| - Hours of training needed                                                                     | Persons            | 8            |
| <b>Number of Trainers</b>                                                                      |                    |              |
| - Professional trainer(s)                                                                      | Persons            | 2            |
| - Administrative staff                                                                         | Persons            | 1            |
| <b>Input costs for training</b>                                                                |                    |              |
| <i>Hourly wage</i>                                                                             |                    |              |
| - Professional trainer                                                                         | BDT (USD)/hour     | 500 (5.89)   |
| - Administrative staff                                                                         | BDT (USD)/hour     | 250 (2.94)   |
| <i>Per unit cost of materials</i>                                                              |                    |              |
| - Instructive handbooks                                                                        | BDT (USD)/book     | 1000 (11.8)  |
| - Facility rental for training (one day)                                                       | BDT (USD)/day      | 9000 (106)   |
| - Refreshments                                                                                 | BDT (USD)/day      | 6000 (70.7)  |
| - Per diem for staff                                                                           | BDT (USD)/day      | 3500 (41.2)  |
| - Per diem and/or salary of trainees                                                           | BDT (USD)/day      | 5000 (58.9)  |
| - Transportation stipend for staff                                                             | BDT (USD)/training | 3165 (37.3)  |
| <b>CVD Risk Screening and Diagnosis</b>                                                        |                    |              |
| Time (in minutes) a health provider spends to:                                                 |                    |              |
| - Screen patients for total CVD risk                                                           | Minutes            | 5            |
| - Provide a physical exam to assess patients' total CVD risk                                   | Minutes            | 5            |
| - Assess patient risk using a CVD risk chart                                                   | Minutes            | 5            |
| Time (in minutes) a lab technician spends to:                                                  |                    |              |
| - Administer and analyze a blood test                                                          | Minutes            | 10           |
| - Administer and analyze a urine test                                                          | Minutes            | 10           |
| <b>Treatment for High CVD Risk</b>                                                             |                    |              |
| <b># follow-up visits for a person annually with the following levels of CVD risk annually</b> |                    |              |
| - Low CVD risk ( $\geq 0\%$ to $< 10\%$ )                                                      | Visits             | 2            |
| - Medium CVD risk ( $\geq 10\%$ to $< 20\%$ )                                                  | Visits             | 3            |
| - High CVD risk ( $\geq 20\%$ )                                                                | Visits             | 4            |
| Time health providers spend with a patient during a visit?                                     |                    |              |
| - Generalists/primary care doctors                                                             | Minutes            | 5            |
| - Nurses                                                                                       | Minutes            | 5            |
| <b>Screen for CVD risk: Diagnostics cost in LCU (BDT) and USD</b>                              |                    |              |
| - Diabetes (complete blood count panel)                                                        | BDT (USD)/test     | 400 (4.7)    |
| - Diabetes (Fasting blood glucose)                                                             | BDT (USD)/test     | 120 (1.4)    |
| - Diabetes and Cholesterol (Blood lipid panel)                                                 | BDT (USD)/test     | 80 (0.9)     |
| <b>Pharmacological treatment for hypertension</b>                                              |                    |              |
| - Hypertension Protocol Step #1 (Amlodipine 5mg, 1 per day, 365 days)                          |                    |              |
| - % of all individuals with high blood pressure who receive this treatment regimen             | Percent            | 62%          |
| - Hypertension Protocol Step #2 (Amlodipine 5mg + Losartan 50mg)                               |                    |              |
| - % of all individuals with high blood pressure who receive this treatment regimen             | Percent            | 34%          |
| - Hypertension Protocol Step #3 (Amlodipine + Losartan+ Hydrochlorothiazide)                   |                    |              |
| - % of all individuals with high blood pressure who receive this treatment regimen             | Percent            | 4%           |
| - Unit price of amlodipine 5mg in LCU (Taka or BDT) and USD                                    | BDT (USD)/tablet   | 1 (0.012)    |
| - Unit price of losartan 50 mg in LCU (Taka or BDT) and USD                                    | BDT (USD)/tablet   | 8 (0.094)    |
| - Unit price of hydrochlorothiazide in LCU (Taka or BDT) and USD                               | BDT (USD)/tablet   | 0.35 (0.004) |
| <b>Pharmacological treatment for diabetes</b>                                                  |                    |              |
| - Diabetes Protocol Step #1 (metformin 500mg)                                                  |                    |              |
| - % of all individuals with diabetes who receive this treatment regimen                        | Percent            | 75%          |
| - Diabetes Protocol Step #2 (metformin 1000mg)                                                 |                    |              |
| - % of all individuals with diabetes who receive this treatment regimen                        | Percent            | 15%          |
| - Diabetes Protocol Step #3 (metformin 1000mg+gliclazide 8mg)                                  |                    |              |
| - % of all individuals with diabetes who receive this treatment regimen                        | Percent            | 10%          |
| - Unit price of metformin 500mg in LCU (Taka or BDT) and USD                                   | BDT (USD)/tablet   | 4 (0.047)    |

|                                                                          |                                                                             |                  |             |
|--------------------------------------------------------------------------|-----------------------------------------------------------------------------|------------------|-------------|
| -                                                                        | Unit price of metformin 1000mg in LCU (Taka or BDT) and USD                 | BDT (USD)/tablet | 9 (0.106)   |
| -                                                                        | Unit price of gliclazide 80mg in LCU (Taka or BDT) and USD                  | BDT (USD)/tablet | 3.5 (0.041) |
| <b>Pharmacological treatment for high cholesterol (default regimens)</b> |                                                                             |                  |             |
| -                                                                        | High Cholesterol Protocol Step #1 (low intensity, simvastatin 10mg)         |                  |             |
| -                                                                        | Percent of all individuals with high cholesterol who receive this treatment | Percent          | 85%         |
| -                                                                        | High Cholesterol Protocol Step #2 (moderate intensity, atorvastatin 20mg)   |                  |             |
| -                                                                        | Percent of all individuals with high cholesterol who receive this treatment | Percent          | 10%         |
| -                                                                        | High Cholesterol Protocol Step #3 (high intensity, atorvastatin 40mg)       |                  |             |
| -                                                                        | Percent of all individuals with high cholesterol who receive this treatment | Percent          | 5%          |
| -                                                                        | Unit price of simvastatin 10mg in LCU (Taka or BDT) and USD                 | BDT (USD)/tablet | 7 (0.082)   |
| -                                                                        | Unit price of simvastatin 20mg in LCU (Taka or BDT) and USD                 | BDT (USD)/tablet | 10 (0.118)  |
| -                                                                        | Unit price of atorvastatin 40mg in LCU (Taka or BDT) and USD                | BDT (USD)/tablet | 28 (0.330)  |

Note: \* The '5A' (Assess, Advise, Agree, Assist, Arrange) model is an evidence-based approach entailing health behavior change counselling to prevent NCD risk factors in primary care setting (Glasgow et al., 2006; Whitlock et al., 2002). LCU: Local currency unit; BDT: Bangladesh Taka.

### 3. RESULTS

#### 3.1. Population coverage

The total population in the four sub-districts was 1.12 million, of which 749,000 were adults aged 18 and above (Table 2). The total number of people eligible to receive counselling, screening, diagnosis, and treatment under the two types of HEARTS intervention packages (i.e., hypertension control and risk-based integrated approach) in the four sub-districts was determined by the primary care attendance rate, the prevalence of low-, medium-, and high- CVD risk in the population, the prevalence of hypertension, diabetes, and high cholesterol. The estimated number of eligible persons in the catchment area of the four sub-districts was 359,000, of which 305,000, 52,000, and 1,800 were projected to be low-, medium, and high- CVD risk patients. The estimated number of persons undergoing treatment for hypertension, diabetes, and high cholesterol was 75,000, 30,000, and 102,000, respectively (Table 2). Unit costs and other cost inputs were applied to these population parameters to project total program costs.

**Table 2: Population coverage: Care cascade for counselling, screening, diagnosis, and treatment**

|                                                    | Golapganj | Fenchuganj | Beanibazar | Bishwanath | Total   |
|----------------------------------------------------|-----------|------------|------------|------------|---------|
| Total population                                   | 390688    | 129436     | 313412     | 287404     | 1120940 |
| Adult population in need (18+ years)               | 261,098   | 86,503     | 209454     | 192075     | 749130  |
| Adults who present at the health center            | 125,066   | 41,435     | 100,328    | 92,004     | 358833  |
| <b>Providing brief counseling</b>                  |           |            |            |            |         |
| Eligible to receive brief advice                   | 125,066   | 41,435     | 100,328    | 92,004     | 358833  |
| <i>Tobacco user</i>                                | 54,654    | 18,107     | 43,844     | 40,206     | 156810  |
| <i>Harmful alcohol</i>                             | 5,503     | 1,823      | 4,414      | 4,048      | 15789   |
| <i>Physical inactivity</i>                         | 15,383    | 5,096      | 12,340     | 11,316     | 44136   |
| <b>Screening and diagnosis of 10-year CVD risk</b> |           |            |            |            |         |
| Low CVD risk                                       | 106,431   | 35,261     | 85,380     | 78,295     | 305367  |

|                                      |         |        |        |        |         |
|--------------------------------------|---------|--------|--------|--------|---------|
| Medium CVD risk                      | 18,009  | 5,967  | 14,447 | 13,249 | 51672   |
| High CVD risk                        | 625     | 207    | 502    | 460    | 1794    |
| <b>Treatment of 10-year CVD risk</b> |         |        |        |        |         |
| Low CVD risk                         | 106,431 | 35,261 | 85,380 | 78,295 | 305,367 |
| <i>Hypertension</i>                  | 22,351  | 7,405  | 17,930 | 16,442 | 64127   |
| <i>Diabetes</i>                      | 8,834   | 2,927  | 7,087  | 6,499  | 25345   |
| <i>Cholesterol</i>                   | 30,226  | 10,014 | 24,248 | 22,236 | 86724   |
| Medium CVD risk                      | 18,009  | 5,967  | 14,447 | 13,249 | 51672   |
| <i>Hypertension</i>                  | 3,782   | 1,253  | 3,034  | 2,782  | 10851   |
| <i>Diabetes</i>                      | 1,495   | 495    | 1,199  | 1,100  | 4289    |
| <i>Cholesterol</i>                   | 5,115   | 1,695  | 4,103  | 3,763  | 14675   |
| High CVD risk                        | 625     | 207    | 502    | 460    | 1794    |
| <i>Hypertension</i>                  | 131     | 44     | 105    | 97     | 377     |
| <i>Diabetes</i>                      | 52      | 17     | 42     | 38     | 149     |
| <i>Cholesterol</i>                   | 178     | 59     | 142    | 131    | 510     |

Note: Risk factors and disease prevalence rates were assumed uniform across sub-districts.

### 3.2. Hypertension management program cost

Table 3 reports the estimated annual costs, in 2020 USD and Bangladesh Taka (BDT), of implementing the HEARTS hypertension management program in four upazilas at the population level (adults aged 18 and above). Figure 2 presents the distribution of costs by HEARTS components and sub-components. The total annual cost was estimated at USD 3.2 million, equivalent to USD 2.8 per capita, USD 4.3 per adult, and USD 8.9 per eligible participant. Module 'A' (Access to medicines and technology) constitutes the largest cost share (USD 1.36 million; 43%), followed by Module 'E' (Evidence-based treatment protocols; USD 1.22 million; 38%). The projected medication expenditure per patient treated with medications for hypertension was USD 18.

**Table 3: Total annual cost of HEARTS hypertension control program in four sub-districts**

|                                                                           | Golapganj         |                | Fenchuganj        |                | Beanibazar        |                | Bishwanath        |                | Total              |                  |
|---------------------------------------------------------------------------|-------------------|----------------|-------------------|----------------|-------------------|----------------|-------------------|----------------|--------------------|------------------|
|                                                                           | BDT               | USD            | BDT               | USD            | BDT               | USD            | BDT               | USD            | BDT                | USD              |
| <b>H: Healthy Lifestyles</b>                                              | <b>13,335,339</b> | <b>157,071</b> | <b>4,765,107</b>  | <b>56,126</b>  | <b>10,800,324</b> | <b>127,212</b> | <b>9,947,252</b>  | <b>117,164</b> | <b>38,848,022</b>  | <b>457,574</b>   |
| <b>H1: Training costs</b>                                                 | <b>418,990</b>    | <b>4,935</b>   | <b>418,990</b>    | <b>4,935</b>   | <b>418,990</b>    | <b>4,935</b>   | <b>418,990</b>    | <b>4,935</b>   | <b>1,675,960</b>   | <b>19,740</b>    |
| H1.1: Facility rental (% of H1)                                           | 18,000            | 212            | 18,000            | 212            | 18,000            | 212            | 18,000            | 212            | 72,000             | 848              |
| H1.2: Human resources                                                     | 20,000            | 236            | 20,000            | 236            | 20,000            | 236            | 20,000            | 236            | 80,000             | 942              |
| H1.3: Instructive handbooks                                               | 35,000            | 412            | 35,000            | 412            | 35,000            | 412            | 35,000            | 412            | 140,000            | 1,649            |
| H1.4: Per diem/transportation                                             | 339,990           | 4005           | 339,990           | 4,005          | 339,990           | 4,005          | 339,990           | 4,005          | 1,359,960          | 16,018           |
| H1.5: Refreshments                                                        | 6,000             | 71             | 6,000             | 71             | 6,000             | 71             | 6,000             | 71             | 24,000             | 283              |
| <b>H2: Brief counselling costs</b>                                        | <b>12,816,349</b> | <b>150,958</b> | <b>4,246,117</b>  | <b>50,013</b>  | <b>10,281,334</b> | <b>121,099</b> | <b>9,428,262</b>  | <b>111,051</b> | <b>36,772,062</b>  | <b>433,122</b>   |
| H2.1: Tobacco                                                             | 9,272,756         | 109,220        | 3,072,108         | 36,185         | 7,438,647         | 87,617         | 6,821,441         | 80,347         | 26,604,952         | 313,368          |
| <i>Provider time to administer 5A's</i>                                   | <i>3,807,374</i>  | <i>44,845</i>  | <i>1,261,401</i>  | <i>14,857</i>  | <i>3,054,293</i>  | <i>35,975</i>  | <i>2,800,870</i>  | <i>32,990</i>  | <i>10,923,938</i>  | <i>128,668</i>   |
| <i>Informational materials (print)</i>                                    | <i>5,465,382</i>  | <i>64,374</i>  | <i>1,810,707</i>  | <i>21,328</i>  | <i>4,384,354</i>  | <i>51,641</i>  | <i>4,020,572</i>  | <i>47,357</i>  | <i>15,681,014</i>  | <i>184,700</i>   |
| H2.2: Alcohol                                                             | 933,641           | 10,997         | 309,320           | 3,643          | 748,971           | 8,822          | 686,827           | 8,090          | 2,678,759          | 31,552           |
| <i>Provider time to administer 5A's</i>                                   | <i>383,351</i>    | <i>4,515</i>   | <i>127,006</i>    | <i>1,496</i>   | <i>307,526</i>    | <i>3,622</i>   | <i>282,010</i>    | <i>3,322</i>   | <i>1,099,893</i>   | <i>12,955</i>    |
| <i>Informational materials (print)</i>                                    | <i>550,290</i>    | <i>6,482</i>   | <i>182,314</i>    | <i>2,147</i>   | <i>441,445</i>    | <i>5,200</i>   | <i>404,817</i>    | <i>4,768</i>   | <i>1,578,866</i>   | <i>18,597</i>    |
| H2.3: Physical inactivity                                                 | 2,609,952         | 30,741         | 864,689           | 10,185         | 2,093,715         | 24,661         | 1,919,994         | 22,615         | 7,488,350          | 88,202           |
| <i>Provider time to administer 5A's</i>                                   | <i>1,071,641</i>  | <i>12,622</i>  | <i>355,040</i>    | <i>4,182</i>   | <i>859,675</i>    | <i>10,126</i>  | <i>788,345</i>    | <i>9,286</i>   | <i>3,074,701</i>   | <i>36,216</i>    |
| <i>Informational materials (print)</i>                                    | <i>1,538,311</i>  | <i>18,119</i>  | <i>509,650</i>    | <i>6,003</i>   | <i>1,234,040</i>  | <i>14,535</i>  | <i>1,131,648</i>  | <i>13,329</i>  | <i>4,413,649</i>   | <i>51,986</i>    |
| <b>H3: Other program costs</b>                                            | <b>100,000</b>    | <b>1,178</b>   | <b>100,000</b>    | <b>1,178</b>   | <b>100,000</b>    | <b>1,178</b>   | <b>100,000</b>    | <b>1,178</b>   | <b>400,000</b>     | <b>4,711</b>     |
| <i>Community awareness meetings</i>                                       | <i>50,000</i>     | <i>589</i>     | <i>50,000</i>     | <i>589</i>     | <i>50,000</i>     | <i>589</i>     | <i>50,000</i>     | <i>589</i>     | <i>200,000</i>     | <i>2,356</i>     |
| <i>Community health workers training</i>                                  | <i>50,000</i>     | <i>589</i>     | <i>50,000</i>     | <i>589</i>     | <i>50,000</i>     | <i>589</i>     | <i>50,000</i>     | <i>589</i>     | <i>200,000</i>     | <i>2,356</i>     |
| <b>E: Evidence-based Treatment Protocols</b>                              | <b>35,959,415</b> | <b>423,550</b> | <b>11,913,524</b> | <b>140,324</b> | <b>28,846,806</b> | <b>339,774</b> | <b>26,453,304</b> | <b>311,582</b> | <b>103,173,049</b> | <b>1,215,230</b> |
| <b>E1: Ask about patient history - provider time</b>                      | 5,317,334         | 62,631         | 1,761,658         | 20,750         | 4,265,589         | 50,243         | 3,911,661         | 46,074         | 15,256,241         | 179,697          |
| <b>E2: Assess via physical exam and diagnostic tests - provider time</b>  | 5,317,334         | 62,631         | 1,761,658         | 20,750         | 4,265,589         | 50,243         | 3,911,661         | 46,074         | 15,256,241         | 179,697          |
| <b>E3: Return visits - Counsel and treat per protocol - provider time</b> | 25,324,748        | 298,289        | 8,390,209         | 98,825         | 20,315,628        | 239,289        | 18,629,982        | 219,434        | 72,660,567         | 855,837          |
| <b>A: Access to Essential Medicines and Technologies</b>                  | <b>40,197,017</b> | <b>473,463</b> | <b>13,429,971</b> | <b>158,186</b> | <b>32,279,509</b> | <b>380,206</b> | <b>29,615,146</b> | <b>348,824</b> | <b>115,521,643</b> | <b>1,360,679</b> |
| <b>A1: Hypertension medications</b>                                       | 40,028,765        | 471,481        | 13,261,719        | 156,204        | 32,111,257        | 378,224        | 29,446,893        | 346,842        | 114,848,633        | 1,352,752        |
| <i>Amlodipine 5mg</i>                                                     | 9,873,894         | 116,300        | 3,271,268         | 38,531         | 7,920,882         | 93,297         | 7,263,664         | 85,556         | 28,329,707         | 333,683          |
| <i>Losartan 50mg</i>                                                      | 30,016,637        | 353,553        | 9,944,653         | 117,134        | 24,079,482        | 283,622        | 22,081,538        | 260,089        | 86,122,310         | 1,014,397        |
| <i>Hydrochlorothiazide 12.5mg</i>                                         | 138,235           | 1,628          | 45,798            | 539            | 110,892           | 1,306          | 101,691           | 1,198          | 396,616            | 4,672            |

|                                                                                                              | Golapganj         |                  | Fenchuganj        |                | Beanibazar        |                | Bishwanath        |                | Total              |                  |
|--------------------------------------------------------------------------------------------------------------|-------------------|------------------|-------------------|----------------|-------------------|----------------|-------------------|----------------|--------------------|------------------|
|                                                                                                              | BDT               | USD              | BDT               | USD            | BDT               | USD            | BDT               | USD            | BDT                | USD              |
| <b>A2: Diagnostic technologies, machines, and supplies</b>                                                   | 40,028,765        | 471,481          | 13,261,719        | 156,204        | 32,111,257        | 378,224        | 29,446,893        | 346,842        | 114,848,633        | 1,352,752        |
| <b>R: Risk-based Management</b>                                                                              | <b>172,334</b>    | <b>2,030</b>     | <b>172,334</b>    | <b>2,030</b>   | <b>172,334</b>    | <b>2,030</b>   | <b>172,334</b>    | <b>2,030</b>   | <b>689,336</b>     | <b>8,119</b>     |
| R1: Training costs                                                                                           | 172,334           | 2,030            | 172,334           | 2030           | 172,334           | 2,030          | 172,334           | 2,030          | 689,336            | 8,119            |
| <b>T: Team-based care Savings from training nurses and CHWs to do tasks customarily performed by doctors</b> | <b>13,815,043</b> | <b>162,721</b>   | <b>4,576,989</b>  | <b>53,910</b>  | <b>11,082,490</b> | <b>130,536</b> | <b>10,162,944</b> | <b>119,705</b> | <b>39,637,467</b>  | <b>466,872</b>   |
| <b>T1: Savings from training nurses</b>                                                                      | <b>11,976,134</b> | <b>141,062</b>   | <b>3,967,750</b>  | <b>46,734</b>  | <b>9,607,309</b>  | <b>113,160</b> | <b>8,810,163</b>  | <b>103,771</b> | <b>34,361,355</b>  | <b>404,727</b>   |
| <i>Savings from counselling to change behavior</i>                                                           | 1,355,873         | 15,970           | 449,207           | 5,291          | 1,087,688         | 12,811         | 997,439           | 11,748         | 3,890,208          | 45,821           |
| <i>Savings from screening for--and assess--CVD risk</i>                                                      | 3,367,235         | 39,661           | 1,115,581         | 13,140         | 2,701,212         | 31,816         | 2,477,084         | 29,176         | 9,661,112          | 113,794          |
| <i>Savings from treating CVD risk</i>                                                                        | 7,253,025         | 85,430           | 2,402,961         | 28,303         | 5,818,410         | 68,533         | 5,335,639         | 62,846         | 20,810,036         | 245,112          |
| <b>T2: Savings from training CHWs</b>                                                                        | <b>1,838,909</b>  | <b>21,660</b>    | <b>609,239</b>    | <b>7,176</b>   | <b>1,475,181</b>  | <b>17,376</b>  | <b>1,352,781</b>  | <b>15,934</b>  | <b>5,276,112</b>   | <b>62,145</b>    |
| <i>Savings from counselling to change behavior</i>                                                           | 1,838,909         | 21,660           | 609,239           | 7,176          | 1,475,181         | 17,376         | 1,352,781         | 15,934         | 5,276,112          | 62,145           |
| <b>S: Systems for monitoring</b>                                                                             | <b>3,114,636</b>  | <b>36,686</b>    | <b>3,114,636</b>  | <b>36,686</b>  | <b>3,114,636</b>  | <b>36,686</b>  | <b>3,114,636</b>  | <b>36,686</b>  | <b>12,458,546</b>  | <b>146,744</b>   |
| S1: Human resources                                                                                          | 2,969,636         | 34,978           | 2,969,636         | 34,978         | 2,969,636         | 34,978         | 2,969,636         | 34,978         | 11,878,546         | 139,912          |
| S2: Technology                                                                                               | 110,000           | 1,296            | 110,000           | 1,296          | 110,000           | 1,296          | 110,000           | 1,296          | 440,000            | 5,183            |
| S3: Supplies                                                                                                 | 10,000            | 118              | 10,000            | 118            | 10,000            | 118            | 10,000            | 118            | 40,000             | 471              |
| S4: Training                                                                                                 | 25,000            | 294              | 25,000            | 294            | 25,000            | 294            | 25,000            | 294            | 100,000            | 1,178            |
| <b>Total Program Cost (H+E+A+R+T+S)</b>                                                                      | <b>92,778,742</b> | <b>1,092,800</b> | <b>33,395,573</b> | <b>393,352</b> | <b>75,213,609</b> | <b>885,908</b> | <b>69,302,672</b> | <b>816,286</b> | <b>270,690,596</b> | <b>3,188,346</b> |

[Insert Figure 2 here]

**Figure 2: Distribution of annual cost by HEARTS components**

Most of the projected annual cost (95%) of implementing Module ‘H’ (Healthy-lifestyles counselling) was attributable to the cost of provider time and information materials for counselling patients (USD 433,000). The estimated cost for Module ‘E’ (Evidence-based treatment protocols) was attributable to provider time across three major activities: asking patient history (USD 180,000; 15%), patient assessment via physical exam and diagnostic tests (USD 180,000; 15%), and conducting return visits (USD 856,000, 70%). The projected cost to implement Module ‘S’ (Systems for monitoring) was USD 147,000, primarily attributed to administration staff labor costs (95%), with the remaining cost allocated to technology (software/hardware).

Table 4 highlights an important programmatic aspect by describing health providers’ time needed to implement the hypertension control program. Implementing the program at the full population level in all four sub-districts was estimated to require the full time equivalent of 51 doctors, 51 nurses, and 6 community health workers. The largest time requirement activities included providing initial screening and diagnosis and conducting return visits.

**Table 4: Hypertension control program: estimated health provider time for counselling, screening, diagnosis, and treatment**

| Activity                                              | Golapganj           |      | Fenchugonj        |     | Beanibazar          |     | Bishwanath          |     | Total       |
|-------------------------------------------------------|---------------------|------|-------------------|-----|---------------------|-----|---------------------|-----|-------------|
|                                                       | Workdays            | FTE  | Workdays          | FTE | Workdays            | FTE | Workdays            | FTE | FTE         |
| <b>Counselling to change behavior</b>                 |                     |      |                   |     |                     |     |                     |     |             |
| Doctor                                                | 524 days, 7 hours   | 2.0  | 173 days, 6 hours | 0.7 | 420 days, 2 hours   | 1.6 | 385 days, 2 hours   | 1.5 | <b>5.8</b>  |
| Nurses                                                | 524 days, 7 hours   | 2.0  | 173 days, 6 hours | 0.7 | 420 days, 2 hours   | 1.6 | 385 days, 2 hours   | 1.5 | <b>5.8</b>  |
| CHW                                                   | 524 days, 7 hours   | 2.0  | 173 days, 6 hours | 0.7 | 420 days, 2 hours   | 1.6 | 385 days, 2 hours   | 1.5 | <b>5.8</b>  |
| <b>Screening and diagnosis</b>                        |                     |      |                   |     |                     |     |                     |     |             |
| Doctor                                                | 1,302 days, 1 hours | 5.0  | 431 days, 6 hours | 1.7 | 1,045 days, 2 hours | 4.0 | 958 days, 3 hours   | 3.7 | <b>14.4</b> |
| Nurses                                                | 1,302 days, 1 hours | 5.0  | 431 days, 6 hours | 1.7 | 1,045 days, 2 hours | 4.0 | 958 days, 3 hours   | 3.7 | <b>14.4</b> |
| <b>Return visits - Counsel and treat per protocol</b> |                     |      |                   |     |                     |     |                     |     |             |
| Doctor                                                | 2,806 days, 0 hours | 10.8 | 929 days, 6 hours | 3.6 | 2,251 days, 1 hours | 8.7 | 2,064 days, 2 hours | 7.9 | <b>31.0</b> |
| Nurses                                                | 2,806 days, 0 hours | 10.8 | 929 days, 6 hours | 3.6 | 2,251 days, 1 hours | 8.7 | 2,064 days, 2 hours | 7.9 | <b>31.0</b> |

Note: FTE: Full-time equivalent (annual: total minutes/124800).

### 3.3. Risk-based integrated hypertension, diabetes, and high cholesterol management program cost

Table 5 reports the estimated costs of implementing the risk-based hypertension, diabetes, and high cholesterol management program in four upazilas at the population level (adults aged 18 and above). Figure 2 presents the distribution of costs by HEARTS components. The total annual cost was estimated at USD 14.4 million, equivalent to USD 12.9 per capita, USD 19.3 per adult, and USD 40.2 per eligible participant. Module 'A' (Access to medicines and technology) constitutes the largest cost share (USD 11.7 million; 81%), followed by Module 'E' (Evidence-based treatment protocols, USD 1.9 million; 13%). Within Module 'A', the projected costs of diagnostic tests, hypertension medications, diabetes medications, and cholesterol medications were USD 5.7 million (49% of module costs), USD 1.4 million (12%), USD 0.9 million (7%), and USD 3.8 million (32%), respectively. The projected medication expenditure per patient treated with medications for hypertension, diabetes, and cholesterol was USD 18, USD 29, and USD 37, respectively.



**Table 5: Annual cost of implementing risk-based hypertension, diabetes, and high cholesterol management program in four sub-districts**

|                                                                           | Golapganj          |                  | Fenchuganj         |                  | Beanibazar         |                  | Bishwanath         |                  | Total              |                   |
|---------------------------------------------------------------------------|--------------------|------------------|--------------------|------------------|--------------------|------------------|--------------------|------------------|--------------------|-------------------|
|                                                                           | BDT                | USD               |
| <b>H: Healthy Lifestyles Counselling</b>                                  | <b>13,335,339</b>  | <b>157,071</b>   | <b>4,765,107</b>   | <b>56,126</b>    | <b>10,800,324</b>  | <b>127,212</b>   | <b>9,947,252</b>   | <b>117,164</b>   | <b>38,848,022</b>  | <b>457,574</b>    |
| <b>H1: Training costs</b>                                                 | <b>418,990</b>     | <b>4,935</b>     | <b>418,990</b>     | <b>4,935</b>     | <b>418,990</b>     | <b>4,935</b>     | <b>418,990</b>     | <b>4,935</b>     | <b>1,675,960</b>   | <b>19,740</b>     |
| H1.1: Facility rental (% of H1)                                           | 18,000             | 212              | 18,000             | 212              | 18,000             | 212              | 18,000             | 212              | 72,000             | 848               |
| H1.2: Human resources                                                     | 20,000             | 236              | 20,000             | 236              | 20,000             | 236              | 20,000             | 236              | 80,000             | 942               |
| H1.3: Instructive handbooks                                               | 35,000             | 412              | 35,000             | 412              | 35,000             | 412              | 35,000             | 412              | 140,000            | 1,649             |
| H1.4: Per diem/transportation                                             | 339,990            | 4,005            | 339,990            | 4,005            | 339,990            | 4,005            | 339,990            | 4,005            | 1,359,960          | 16,018            |
| H1.5: Refreshments                                                        | 6,000              | 71               | 6,000              | 71               | 6,000              | 71               | 6,000              | 71               | 24,000             | 283               |
| <b>H2: Brief counselling costs</b>                                        | <b>12,816,349</b>  | <b>150,958</b>   | <b>4,246,117</b>   | <b>50,013</b>    | <b>10,281,334</b>  | <b>121,099</b>   | <b>9,428,262</b>   | <b>111,051</b>   | <b>36,772,062</b>  | <b>433,122</b>    |
| H2.1: Tobacco                                                             | 9,272,756          | 109,220          | 3,072,108          | 36,185           | 7,438,647          | 87,617           | 6,821,441          | 80,347           | 26,604,952         | 313,368           |
| <i>Provider time to administer 5A's</i>                                   | 3,807,374          | 44,845           | 1,261,401          | 14,857           | 3,054,293          | 35,975           | 2,800,870          | 32,990           | 10,923,938         | 128,668           |
| <i>Informational materials (print)</i>                                    | 5,465,382          | 64,374           | 1,810,707          | 21,328           | 4,384,354          | 51,641           | 4,020,572          | 47,357           | 15,681,014         | 184,700           |
| H2.2: Alcohol                                                             | 933,641            | 10,997           | 309,320            | 3,643            | 748,971            | 8,822            | 686,827            | 8,090            | 2,678,759          | 31,552            |
| <i>Provider time to administer 5A's</i>                                   | 383,351            | 4,515            | 127,006            | 1,496            | 307,526            | 3,622            | 282,010            | 3,322            | 1,099,893          | 12,955            |
| <i>Informational materials (print)</i>                                    | 550,290            | 6,482            | 182,314            | 2,147            | 441,445            | 5,200            | 404,817            | 4,768            | 1,578,866          | 18,597            |
| H2.3: Physical inactivity                                                 | 2,609,952          | 30,741           | 864,689            | 10,185           | 2,093,715          | 24,661           | 1,919,994          | 22,615           | 7,488,350          | 88,202            |
| <i>Provider time to administer 5A's</i>                                   | 1,071,641          | 12,622           | 355,040            | 4,182            | 859,675            | 10,126           | 788,345            | 9,286            | 3,074,701          | 36,216            |
| <i>Informational materials (print)</i>                                    | 1,538,311          | 18,119           | 509,650            | 6,003            | 1,234,040          | 14,535           | 1,131,648          | 13,329           | 4,413,649          | 51,986            |
| <b>H3: Other program costs</b>                                            | <b>100,000</b>     | <b>1,178</b>     | <b>100,000</b>     | <b>1,178</b>     | <b>100,000</b>     | <b>1,178</b>     | <b>100,000</b>     | <b>1,178</b>     | <b>400,000</b>     | <b>4,711</b>      |
| <i>Community awareness meetings</i>                                       | 50,000             | 589              | 50,000             | 589              | 50,000             | 589              | 50,000             | 589              | 200,000            | 2,356             |
| <i>Community health workers training</i>                                  | 50,000             | 589              | 50,000             | 589              | 50,000             | 589              | 50,000             | 589              | 200,000            | 2,356             |
| <b>E: Evidence-based Treatment Protocols</b>                              | <b>56,155,264</b>  | <b>661,428</b>   | <b>18,604,504</b>  | <b>219,134</b>   | <b>45,048,007</b>  | <b>530,601</b>   | <b>41,310,245</b>  | <b>486,575</b>   | <b>161,118,020</b> | <b>1,897,739</b>  |
| <b>E1: Ask about patient history - provider time</b>                      | <b>5,317,334</b>   | <b>62,631</b>    | <b>1,761,658</b>   | <b>20,750</b>    | <b>4,265,589</b>   | <b>50,243</b>    | <b>3,911,661</b>   | <b>46,074</b>    | <b>15,256,241</b>  | <b>179,697</b>    |
| <b>E2: Assess via physical exam and diagnostic tests - provider time</b>  | <b>25,513,182</b>  | <b>300,509</b>   | <b>8,452,638</b>   | <b>99,560</b>    | <b>20,466,790</b>  | <b>241,069</b>   | <b>18,768,602</b>  | <b>221,067</b>   | <b>73,201,212</b>  | <b>862,205</b>    |
| <b>E3: Return visits - Counsel and treat per protocol - provider time</b> | <b>25,324,748</b>  | <b>298,289</b>   | <b>8,390,209</b>   | <b>98,825</b>    | <b>20,315,628</b>  | <b>239,289</b>   | <b>18,629,982</b>  | <b>219,434</b>   | <b>72,660,567</b>  | <b>855,837</b>    |
| <b>A: Access to Essential Medicines and tech.</b>                         | <b>347,102,943</b> | <b>4,088,374</b> | <b>115,109,353</b> | <b>1,355,823</b> | <b>278,480,835</b> | <b>3,280,104</b> | <b>255,388,440</b> | <b>3,008,109</b> | <b>996,081,571</b> | <b>11,732,410</b> |
| <b>A1: Diagnostic tests</b>                                               | <b>170,039,655</b> | <b>2,002,823</b> | <b>56,334,940</b>  | <b>663,545</b>   | <b>136,406,582</b> | <b>1,606,674</b> | <b>125,088,536</b> | <b>1,473,363</b> | <b>487,869,714</b> | <b>5,746,404</b>  |
| <i>Complete blood count (panel)</i>                                       | 51,527,168         | 606,916          | 17,071,194         | 201,074          | 41,335,328         | 486,871          | 37,905,617         | 446,474          | 147,839,307        | 1,741,335         |
| <i>Blood lipid panel</i>                                                  | 103,054,336        | 1,213,832        | 34,142,388         | 402,148          | 82,670,656         | 973,742          | 75,811,234         | 892,947          | 295,678,614        | 3,482,669         |
| <i>Fasting blood glucose (FPG)</i>                                        | 15,458,150         | 182,075          | 5,121,358          | 60,322           | 12,400,598         | 146,061          | 11,371,685         | 133,942          | 44,351,792         | 522,400           |

|                                                                                                               | Golapganj          |                  | Fenchuganj         |                  | Beanibazar         |                  | Bishwanath         |                  | Total                |                   |
|---------------------------------------------------------------------------------------------------------------|--------------------|------------------|--------------------|------------------|--------------------|------------------|--------------------|------------------|----------------------|-------------------|
|                                                                                                               | BDT                | USD              | BDT                | USD              | BDT                | USD              | BDT                | USD              | BDT                  | USD               |
| <b>A2: Hypertension medications</b>                                                                           | <b>40,028,765</b>  | <b>471,481</b>   | <b>13,261,719</b>  | <b>156,204</b>   | <b>32,111,257</b>  | <b>378,224</b>   | <b>29,446,893</b>  | <b>346,842</b>   | <b>114,848,633</b>   | <b>1,352,752</b>  |
| <i>Amlodipine 5mg</i>                                                                                         | 9,873,894          | 116,300          | 3,271,268          | 38,531           | 7,920,882          | 93,297           | 7,263,664          | 85,556           | 28,329,707           | 333,683           |
| <i>Losartan 50mg</i>                                                                                          | 30,016,637         | 353,553          | 9,944,653          | 117,134          | 24,079,482         | 283,622          | 22,081,538         | 260,089          | 86,122,310           | 1,014,397         |
| <i>Hydrochlorothiazide 12.5mg</i>                                                                             | 138,235            | 1,628            | 45,798             | 539              | 110,892            | 1,306            | 101,691            | 1,198            | 396,616              | 4,672             |
| <b>A3: Diabetes medications</b>                                                                               | <b>25,366,503</b>  | <b>298,781</b>   | <b>8,404,042</b>   | <b>98,988</b>    | <b>20,349,124</b>  | <b>239,683</b>   | <b>18,660,698</b>  | <b>219,796</b>   | <b>72,780,367</b>    | <b>857,248</b>    |
| <i>Metformin 500mg</i>                                                                                        | 11,707,617         | 137,899          | 3,878,789          | 45,687           | 9,391,903          | 110,623          | 8,612,630          | 101,444          | 33,590,939           | 395,653           |
| <i>Metformin 1000mg</i>                                                                                       | 12,292,998         | 144,794          | 4,072,728          | 47,971           | 9,861,498          | 116,154          | 9,043,262          | 106,517          | 35,270,486           | 415,436           |
| <i>Gliclazide</i>                                                                                             | 1,365,889          | 16,088           | 452,525            | 5,330            | 1,095,722          | 12,906           | 1,004,807          | 11,835           | 3,918,943            | 46,160            |
| <b>A4: Cholesterol medications</b>                                                                            | <b>111,499,768</b> | <b>1,313,307</b> | <b>36,940,399</b>  | <b>435,105</b>   | <b>89,445,620</b>  | <b>1,053,541</b> | <b>82,024,060</b>  | <b>966,126</b>   | <b>319,909,847</b>   | <b>3,768,078</b>  |
| <i>Simvastatin 10mg</i>                                                                                       | 79,451,930         | 935,830          | 26,322,800         | 310,045          | 63,736,699         | 750,727          | 58,448,282         | 688,437          | 227,959,711          | 2,685,038         |
| <i>Atorvastatin 20mg</i>                                                                                      | 13,353,266         | 157,282          | 4,424,000          | 52,108           | 10,712,050         | 126,173          | 9,823,241          | 115,704          | 38,312,556           | 451,267           |
| <i>Atorvastatin 40mg</i>                                                                                      | 18,694,572         | 220,195          | 6,193,600          | 72,952           | 14,996,870         | 176,642          | 13,752,537         | 161,985          | 53,637,579           | 631,774           |
| <b>A5: Diagnostic tech. machines, and supplies</b>                                                            | <b>168,253</b>     | <b>1,982</b>     | <b>168,253</b>     | <b>1,982</b>     | <b>168,253</b>     | <b>1,982</b>     | <b>168,253</b>     | <b>1,982</b>     | <b>673,010</b>       | <b>7,927</b>      |
| <b>R: Risk-based Management</b>                                                                               | <b>5,489,668</b>   | <b>64,660</b>    | <b>1,933,992</b>   | <b>22,780</b>    | <b>4,437,923</b>   | <b>52,272</b>    | <b>4,083,995</b>   | <b>48,104</b>    | <b>15,945,577</b>    | <b>187,816</b>    |
| <b>R1: Training costs</b>                                                                                     | 172,334            | 2,030            | 172,334            | 2,030            | 172,334            | 2,030            | 172,334            | 2,030            | 689,336              | 8,119             |
| <b>R2: Estimate risk using risk charts</b>                                                                    | 5,317,334          | 62,631           | 1,761,658          | 20,750           | 4,265,589          | 50,243           | 3,911,661          | 46,074           | 15,256,241           | 179,697           |
| <b>T: Team-based care: Savings from training nurses and CHWs to do tasks customarily performed by doctors</b> | <b>25,600,367</b>  | <b>301,536</b>   | <b>8,481,523</b>   | <b>99,900</b>    | <b>20,536,731</b>  | <b>241,893</b>   | <b>18,832,739</b>  | <b>221,823</b>   | <b>73,451,360</b>    | <b>865,151</b>    |
| <b>T1: Savings from training nurses</b>                                                                       | <b>23,761,458</b>  | <b>279,876</b>   | <b>7,872,283</b>   | <b>92,724</b>    | <b>19,061,549</b>  | <b>224,518</b>   | <b>17,479,958</b>  | <b>205,889</b>   | <b>68,175,248</b>    | <b>803,006</b>    |
| <i>Savings from counselling to change behavior</i>                                                            | 1,355,873          | 15,970           | 449,207            | 5,291            | 1,087,688          | 12,811           | 997,439            | 11,748           | 3,890,208            | 45,821            |
| <i>Savings from screening for--and assess--CVD risk</i>                                                       | 15,152,559         | 178,475          | 5,020,114          | 59,130           | 12,155,452         | 143,174          | 11,146,879         | 131,294          | 43,475,005           | 512,073           |
| <i>Savings from treating CVD risk</i>                                                                         | 7,253,025          | 85,430           | 2,402,961          | 28,303           | 5,818,410          | 68,533           | 5,335,639          | 62,846           | 20,810,036           | 245,112           |
| <b>T2: Savings from training CHWs</b>                                                                         | <b>1,838,909</b>   | <b>21,660</b>    | <b>609,239</b>     | <b>7,176</b>     | <b>1,475,181</b>   | <b>17,376</b>    | <b>1,352,781</b>   | <b>15,934</b>    | <b>5,276,112</b>     | <b>62,145</b>     |
| <i>Savings from counselling to change behavior</i>                                                            | 1,838,909          | 21,660           | 609,239            | 7,176            | 1,475,181          | 17,376           | 1,352,781          | 15,934           | 5,276,112            | 62,145            |
| <b>S: Systems for monitoring</b>                                                                              | <b>3,114,636</b>   | <b>36,686</b>    | <b>3,114,636</b>   | <b>36,686</b>    | <b>3,114,636</b>   | <b>36,686</b>    | <b>3,114,636</b>   | <b>36,686</b>    | <b>12,458,546</b>    | <b>146,744</b>    |
| <b>S1: Human resources</b>                                                                                    | 2,969,636          | 34,978           | 2,969,636          | 34,978           | 2,969,636          | 34,978           | 2,969,636          | 34,978           | 11,878,546           | 139,912           |
| <b>S2: Technology</b>                                                                                         | 110,000            | 1,296            | 110,000            | 1,296            | 110,000            | 1,296            | 110,000            | 1,296            | 440,000              | 5,183             |
| <b>S3: Supplies</b>                                                                                           | 10,000             | 118              | 10,000             | 118              | 10,000             | 118              | 10,000             | 118              | 40,000               | 471               |
| <b>S4: Training</b>                                                                                           | 25,000             | 294              | 25,000             | 294              | 25,000             | 294              | 25,000             | 294              | 100,000              | 1,178             |
| <b>Total Program Cost (H+E+A+R+T+S)</b>                                                                       | <b>425,197,850</b> | <b>5,008,220</b> | <b>143,527,592</b> | <b>1,690,549</b> | <b>341,881,725</b> | <b>4,026,875</b> | <b>313,844,568</b> | <b>3,696,638</b> | <b>1,224,451,735</b> | <b>14,422,282</b> |

1  
2  
3 The adoption of task-sharing approach would save USD 865,000, of which USD 803,000 comes  
4 from using nurses to complete tasks customarily performed by doctors (i.e., counselling, screening, and  
5 assessing CVD risk, and treating according to CVD risk) and USD 62,000 comes from using CHWs to  
6 provide counselling to change behavior. Implementing the risk-based hypertension, diabetes, and high  
7 cholesterol management program at the full population level in all four sub-districts was estimated to  
8 require the full time equivalent of 58 doctors, 58 nurses, 6 CHWs, and 101 lab technicians (Table 6). The  
9 largest time requirement activities included providing initial screening and diagnosis and conducting  
10 return visits.  
11  
12  
13  
14  
15  
16  
17  
18  
19  
20  
21  
22  
23  
24  
25  
26  
27  
28  
29  
30  
31  
32  
33  
34  
35  
36  
37  
38  
39  
40  
41  
42  
43  
44  
45  
46  
47  
48  
49  
50  
51  
52  
53  
54  
55  
56  
57  
58  
59  
60

1  
2  
3  
4  
5  
6  
7  
8  
9  
10  
11  
12  
13  
14  
15  
16  
17  
18  
19  
20  
21  
22  
23  
24  
25  
26  
27  
28  
29  
30  
31  
32  
33  
34  
35  
36  
37  
38  
39  
40  
41  
42  
43  
44  
45  
46  
47

**Table 6: Integrated risk-based approach: estimated health provider time for counselling, screening, diagnosis, and treatment**

| Activity                                              | Golapganj           |      | Fenchugonj          |      | Beanibazar          |      | Bishwanath          |      | Total        |
|-------------------------------------------------------|---------------------|------|---------------------|------|---------------------|------|---------------------|------|--------------|
|                                                       | Workdays            | FTE  | Workdays            | FTE  | Workdays            | FTE  | Workdays            | FTE  | FTE          |
| <b>Counselling to change behavior</b>                 |                     |      |                     |      |                     |      |                     |      |              |
| Doctor                                                | 524 days, 7 hours   | 2.0  | 173 days, 6 hours   | 0.7  | 420 days, 2 hours   | 1.6  | 385 days, 2 hours   | 1.5  | <b>5.8</b>   |
| Nurses                                                | 524 days, 7 hours   | 2.0  | 173 days, 6 hours   | 0.7  | 420 days, 2 hours   | 1.6  | 385 days, 2 hours   | 1.5  | <b>5.8</b>   |
| CHW                                                   | 524 days, 7 hours   | 2.0  | 173 days, 6 hours   | 0.7  | 420 days, 2 hours   | 1.6  | 385 days, 2 hours   | 1.5  | <b>5.8</b>   |
| <b>Screening and diagnosis</b>                        |                     |      |                     |      |                     |      |                     |      |              |
| Doctor                                                | 1,302 days, 1 hours | 5.0  | 431 days, 6 hours   | 1.7  | 1,045 days, 2 hours | 4.0  | 958 days, 3 hours   | 3.7  | <b>14.4</b>  |
| Nurses                                                | 1,302 days, 1 hours | 5.0  | 431 days, 6 hours   | 1.7  | 1,045 days, 2 hours | 4.0  | 958 days, 3 hours   | 3.7  | <b>14.4</b>  |
| <b>Screening and diagnosis by Lab technicians</b>     | 9,119 days, 3 hours | 35.1 | 3,021 days, 6 hours | 11.6 | 7,315 days, 0 hours | 28.1 | 6,708 days, 1 hours | 25.8 | <b>100.6</b> |
| <b>Estimating CVD risk using risk charts</b>          |                     |      |                     |      |                     |      |                     |      |              |
| Doctor                                                | 2,658,667           | 2.5  | 880,829             | 0.8  | 2,132,795           | 2.0  | 1,955,830           | 1.8  | <b>7.2</b>   |
| Nurses                                                | 2,658,667           | 2.5  | 880,829             | 0.8  | 2,132,795           | 2.0  | 1,955,830           | 1.8  | <b>7.2</b>   |
| <b>Return visits - Counsel and treat per protocol</b> |                     |      |                     |      |                     |      |                     |      |              |
| Doctor                                                | 2,806 days, 0 hours | 10.8 | 929 days, 6 hours   | 3.6  | 2,251 days, 1 hours | 8.7  | 2,064 days, 2 hours | 7.9  | <b>31.0</b>  |
| Nurses                                                | 2,806 days, 0 hours | 10.8 | 929 days, 6 hours   | 3.6  | 2,251 days, 1 hours | 8.7  | 2,064 days, 2 hours | 7.9  | <b>31.0</b>  |

#### 4. Discussion

The HEARTS pilot project in four Bangladesh sub-districts launched a framework for hypertension management in primary care, with a potential for expanding into a comprehensive CVD prevention approach that incorporates hypertension, diabetes, and cholesterol management. This study projects the expected cost of scaling up the program to all eligible adults in the participating sub-districts. We assessed two program scenarios: a hypertension management program and an integrated risk-based hypertension, diabetes, and cholesterol management program. The total annual cost was estimated at USD 3.2 and 14.4 million USD for the hypertension and risk-based comprehensive approach, respectively. The overall per capita cost was approximately USD 2.8 per capita for the hypertension control program and USD 12.9 per capita for the risk-based comprehensive approach. These estimates correspond to 0.14% and 0.7% of the 2020 gross domestic product per capita in Bangladesh, respectively. The main cost drivers for the hypertension control program were medication expenditures (43%) and the cost of provider time for providing care during multiple visits (38%). In the risk-based integrated approach, the combined costs of hypertension, diabetes, and cholesterol medications and diagnostic tests make up the largest share of the overall program cost (81%). Although the main driver of projected program costs for the integrated approach was expenditure on essential medicines and diagnostic tests, hypertension and diabetes medications contributed a relatively small portion (19%) to this expenditure (i.e., Module A), whereas cholesterol medications contributed nearly 32%. Hypertension treatment remains among the leading cost-effective ways to combat heart disease. In this study, the annual medication expenditure per patient treated with medications for hypertension, diabetes, and cholesterol was USD 18, USD 29, and USD 37, respectively.

Though based on observations gathered in one district of Bangladesh, our results are consistent with those reported by past studies. A previous study on Bangladesh by Nugent et al. (2017) estimated that hypertension treatment would cost about USD 13 (BDT 1,070) per patient per year.[32] WHO (2011) has estimated the average hypertension screening cost for LMICs at approximately USD 4 for LMICs, not including treatment but including the cost of performing CVD risk assessment and BP measurement in primary care settings.[33] Haque (2016) estimated the average cost of diabetes screening in Bangladesh at approximately USD 5 (BDT 411), including glucose screening in primary care, documentation, setting up referrals, and organizing screening events but excluding treatment.[34] In this study, the cost elements in the Bangladesh HEARTS program are wide-ranging including screening, diagnosis, and treatment for multiple CVD risk conditions (hypertension, diabetes, hyperlipidemia) and counseling for CVD risk factors (tobacco use, alcohol use, and physical inactivity).

1  
2  
3 The analysis revealed that scaling up the hypertension management program within the four sub-  
4 districts would require an additional full-time equivalent of 51 doctors, 51 nurses, and 6 CHWs.  
5  
6 Population-level scale-up of the risk-based hypertension, diabetes, and high cholesterol management  
7 program in the four sub-districts was estimated to require the full time equivalent of 58 doctors, 58 nurses,  
8 6 CHWs, and 101 lab technicians. To put this in context, a typical 50-bed sub-district public health  
9 complex in Bangladesh employs 20 doctors, 16 nurses, and one medical assistant. Oftentimes, not all  
10 health provider posts are filled. This gap in provider capacity poses a significant barrier to program  
11 expansion. Team-based care using task-sharing among doctors, nurses and community health workers and  
12 volunteers can accomplish the activities required by the HEARTS package more affordably, including  
13 NCD-related health promotion, prevention, screening, and patient navigation through the health system. A  
14 systematic review of intervention trials in low- and middle-income countries by Joshi et al. (2014) found  
15 that team-based care, including task sharing was effective in improving process outcomes (e.g.,  
16 hypertension and diabetes screening) and health outcomes (e.g., hypertension and diabetes control), and  
17 achieving treatment concordance with doctors.[35, 17] Krishnan et al. (2019) conducted a study on a  
18 community-based hypertension management program of blood pressure monitoring and lifestyle  
19 counselling intervention undertaken by female community health volunteers (FCHVs) in Nepal, and  
20 assessed the intervention to be highly cost-effective.[36] However, there are several barriers to team-based  
21 care with task sharing, including staff attrition and turnover, retention of training, patient perception and  
22 acceptance toward non-physician health workers, lack of delegation of work by physicians, legislation and  
23 policy etc.[37]

24  
25  
26  
27  
28  
29  
30  
31  
32  
33  
34  
35  
36 In Bangladesh, of the four entities (i.e., the government, for-profit private sector, non-profit  
37 nongovernmental organization, and donor agencies) involved in the primary healthcare provision, the  
38 government plays the leading role, mainly in rural areas. There are six tiers of public healthcare  
39 infrastructure: national, divisional, district, upazila (sub-district), union, and ward levels. To tackle NCDs,  
40 the government of Bangladesh introduced 'NCD Corners' initiative in 2012 dedicated to providing  
41 prevention and care services for common NCDs and related conditions. The government has plans to  
42 expand 'NCD corners' at the upazila level, and the upazila primary care setting is well-positioned to bridge  
43 the link the health care providers down to the union, ward (and community) levels by harnessing  
44 community support and delegating suitable activities under task-sharing principles.[17, 38, 39] This will  
45 enhance healthcare access among disadvantaged populations and mitigate health disparities. Further, in  
46 Bangladesh, according to the 2016 Household Income Expenditure Survey and 2014 Health and Morbidity  
47 Status Survey, one in three patients received treatment from a pharmacy or medical shop, while about one  
48 in five received treatment from public health providers.[40, 41] This emphasizes the need for partnerships  
49 with various types of public-private health providers.  
50  
51  
52  
53  
54  
55  
56  
57  
58  
59  
60

1  
2  
3 The models of care introduced in the Bangladesh national hypertension guidelines and NCD  
4 operational plan are encouraging; however, there are capacity challenges to the scaling-up of NCD care in  
5 Bangladesh.[42, 43] The fiscal year 2021 budget allocation to the health sector stands just above 5%,  
6 which is less than 1% of GDP. Further, less than 5% of public sector funding for health covers NCDs,  
7 despite NCDs being responsible for almost two-thirds (63% in 2016) of disability-adjusted life years  
8 (DALYs) in Bangladesh.[17] The per capita NCD allocation is only USD 0.08.[17] There is a need for  
9 better coordination of non-state stakeholders in NCD control with the public sector with a stronger focus of  
10 the public sector on NCD prevention and health promotion.[17] The health sector in Bangladesh is  
11 financed 93% from domestic sources (74% out-of-pocket, 17% government health expenditure, and 3%  
12 other private sources) and 7% from external health expenditures. Domestic general government health  
13 expenditure per capita is only USD 7 (0.4% of GDP per capita).[44] Due to insufficient public sector  
14 funding, out-of-pocket expenditure for NCD care is large in Bangladesh, contributing to the  
15 impoverishment of patients and their families. Moreover, a recent policy review by Biswas et al (2017)  
16 highlights the lack of proper planning, implementation, and monitoring of NCD health initiatives.[45]  
17 However, the Bangladesh Copenhagen Project assessed the benefits of managing hypertension through  
18 targeted investment and reported a high level of return on investment (BDT 17 benefit for every BDT  
19 spent).[32]

20  
21  
22 This report has several limitations. Due to lack of data at a local level, the cost projections rely on  
23 assumptions regarding population coverage, risk factor prevalence, primary care attendance rate, and  
24 frequency of patient visits by CVD risk, which were assumed to be uniform for the four sub-districts and  
25 across age or sex groups. Similarly, unit costs of supplies, wages, and provider time allocations were  
26 assumed to be the same across sub-districts. Since the examined sub-districts are adjacent to each other,  
27 these unit costs may not be considerably different. While we used average medicine prices, they may vary  
28 in different sub-districts depending on the procurement arrangement and sources. However, in Bangladesh,  
29 the price variations are minimal or low in the public health facilities, given the medicines are procured  
30 mainly from EDCL and/or CMSD.[20, 21] The strength of the study lies in its ability to disaggregate costs  
31 by function, identifying areas for efficiency improvements, such as task-sharing and bridging program  
32 delivery from the upazila level to more localized community facilities.

33  
34  
35 In 2018, the Government of Bangladesh introduced a multisectoral action plan for NCD  
36 prevention and control, which emphasizes NCD risk factors including tobacco use, unhealthy diet, physical  
37 inactivity, and harmful use of alcohol.[43] This study can inform approaches to scaling up this action plan  
38 nationally, with the goal of increasing population outreach for CVD prevention at the primary care level.



Using the costs reported in this study for future cost-effectiveness analyses can further support evidence-based decision making for CVD prevention programs in Bangladesh.

## 5. Conclusion

Expanding the HEARTS hypertension management and CVD prevention program to provide services to the entire eligible population in the catchment area may face constraints in physician capacity. A task-sharing model involving shifting of select tasks from doctors to nurses and local community health workers would be essential for the eventual scale-up of primary care services to prevent CVD in Bangladesh.

### Disclaimer

The findings and conclusions of this report are those of authors only and do not necessarily represent the official position of the Centers for Disease Control and Prevention.

### Author Contribution

MJH and MSH conceptualized the study, led the formal analysis, implemented the methodology and the excel-based costing tool, and wrote the draft manuscript. DK, SRC, MRB, AEM contributed to the study concept, analytical aspects, manuscript write-up and critical review. RT and SJ contributed to data collection and critical review of the manuscript. MJH, MSH, SRC, RT, SJ, and MRB contributed to data collection. All authors provided critical feedback and helped shape the research, analysis, and manuscript.

### Ethics Approval

Ethics approval was not required because this research neither involved human or animal participation nor required consent from human participants.

### Conflict of Interest

The authors declare non conflict of interest

### Data Statement

Data used in this study is included in table 1 of this article.

### Funding

This analysis was conducted on behalf of Resolve to Save Lives, an initiative of Vital Strategies. Resolve to Save Lives is funded by grants from Bloomberg Philanthropies; the Bill and Melinda Gates Foundation; and Gates Philanthropy Partners, which is funded with support from the Chan Zuckerberg Foundation.

## References

1. World Health Organization. 2020. Improving hypertension control in 3 million people: country experiences of programme development and implementation. Geneva: World Health Organization; 2020.
2. World Health Organization. 2013a. A global brief on hypertension: silent killer, global public health crisis: World Health Day 2013. No. WHO/DCO/WHD/2013.2. World Health Organization, 2013.
3. GBD 2013 Risk Factors Collaborators. Global, regional, and national comparative risk assessment of 79 behavioural, environmental and occupational, and metabolic risks or clusters of risks in 188 countries, 1990-2013: a systematic analysis for the Global Burden of Disease Study 2013. *Lancet*. 2015;386:2287-2323.
4. Rapsomaniki E, Timmis A, George J, Pujades-Rodriguez M, Shah AD, Denaxas S, et al. Blood pressure and incidence of twelve cardiovascular diseases: lifetime risks, healthy life-years lost, and age-specific associations in 1·25 million people. *Lancet*. 2014;383:1899–911.
5. Vaes B, Beke E, Truyers C, Elli S, Buntinx F, Verbakel JY, et al. The correlation between blood pressure and kidney function decline in older people: a registry-based cohort study. *BMJ Open*. 2015;5:e007571.
6. Tzourio C. 2007. Hypertension, cognitive decline, and dementia: an epidemiological perspective. *Dialog Clin Neur*. 2007;9:61.
7. Bloch MJ, FASH F, Basile FJ. Cardiovascular risks of hypertension. *UpToDate*. Jan. 2018.
8. World Health Organization. 2012. Sixty-Fifth World Health Assembly Resolutions, Decisions, Annexes. 2012 May 21–26; Available from: <http://www.who.int/mediacentre/events/2012/wha65/en/>. WHA65/2012/REC/1.
9. World Health Organization. 2013b. Global Action Plan for the Prevention and Control of Noncommunicable Diseases: 2013–2020. [online] Geneva, Switzerland: World Health Organization; 2013. Available from: [http://apps.who.int/iris/bitstream/handle/10665/94384/1/9789241506236\\_eng.pdf](http://apps.who.int/iris/bitstream/handle/10665/94384/1/9789241506236_eng.pdf)
10. World Health Organization. 2014. Global status report on noncommunicable diseases 2014 (No. WHO/NMH/NVI/15.1). World Health Organization.
11. World Health Organization. 2020a. Thirteenth General Programme of Work (GPW13): methods for impact measurement. Geneva: World Health Organization; 2020. Available from: <file:///C:/Research/Bangladesh%20HEARTS%20Costing%20tool/gpw13-methodology-nov9-online-version.pdf>
12. United Nations. (2015). Transforming our world: The 2030 agenda for sustainable development. General Assembly 70 session.
13. Riaz BK, Islam MZ, Islam ANMS, Zaman MM, Hossain MA, Rahman MM, Khanam F, K, Amin KMB, Noor IN. Risk factors for non-communicable diseases in Bangladesh: findings of the population-based cross-sectional national survey 2018. *BMJ Open* 2020;10:e041334. doi:10.1136/bmjopen-2020-041334

14. Chowdhury, M. Z. I., Rahman, M., Akter, T., Akhter, T., Ahmed, A., Shovon, M. A., ... & Turin, T. C. (2020). Hypertension prevalence and its trend in Bangladesh: evidence from a systematic review and meta-analysis. *Clinical Hypertension*, 26, 1-19.
15. World Health Organization. 2018. Country Office for Bangladesh. National STEPS survey for non-communicable diseases risk factors in Bangladesh 2018. World Health Organization. Country Office for Bangladesh. <https://apps.who.int/iris/handle/10665/332886>.
16. Alam, B. B., Koziel, A., Fraser-Hurt, N., Shubber, Z., Olabiran, A. F., & Mamza, J. B. (2019). Hypertension and Type-2 Diabetes in Bangladesh: Continuum of Care Assessment and Opportunities for Action (No. 126906, pp. 1-88). The World Bank.
17. The World Bank. (2019). Hypertension and Type-2 Diabetes in Bangladesh: Continuum of Care Assessment and Opportunities for Action. Washington DC: World Bank.
18. World Health Organization. (2020b). Hearts: technical package for cardiovascular disease management in primary health care.
19. World Health Organization. 2016. HEARTS: technical Package for Cardiovascular Disease Management in Primary Health Care. Geneva, Switzerland: World Health Organization; 2016. Available from: <https://apps.who.int/iris/bitstream/handle/10665/252661/9789241511377-en...>
20. World Health Organization. 2014. Medicines in Health Care Delivery Bangladesh: Situational Analysis: 13 – 25 September 2014 Report prepared using the WHO/SEARO workbook tool for undertaking a situational analysis of medicines in health care delivery in low and middle income countries. World Health Organization, Regional Office for South East Asia, New Delhi, India.
21. Kasonde, L., Tordrup, D., Naheed, A., Zeng, W., Ahmed, S., & Babar, Z. U. D. (2019). Evaluating medicine prices, availability and affordability in Bangladesh using World Health Organisation and Health Action International methodology. *BMC health services research*, 19, 1-12.
22. HEARTS technical package for cardiovascular disease management in primary health care: risk based CVD management. Geneva: World Health Organization; 2020. Licence: CC BY-NC-SA 3.0 IGO
23. World Health Organization. (2020). Diagnosis and management of type 2 diabetes (HEARTS-D). WHO/UCN/NCD/20.1. Licence: CC BY-NC-SA 3.0 IGO. World Health Organization: Geneva, Switzerland.
24. Brown, R. E., Welsh, P., & Logue, J. (2020). Systematic review of clinical guidelines for lipid lowering in the secondary prevention of cardiovascular disease events. *Open heart*, 7(2), e001396.
25. Husain, M. J., Allaire, B. T., program: An application Hutchinson, B., Ketgudee, L., Srisuthisak, S., Yueayai, K., ... & Kostova, D. (2020). Assessing costs of a hypertension management of the HEARTS costing tool in a program planning workshop in Thailand. *The Journal of Clinical Hypertension*, 22(1), 111-117.
26. Glasgow, Russell E., Seth Emont, and Doriane C. Miller. "Assessing delivery of the five 'As' for patient-centered counseling." *Health Promotion International* 21.3 (2006): 245-255.
27. Whitlock, E. P., Orleans, C. T., Pender, N., & Allan, J. (2002). Evaluating primary care behavioral counseling interventions: an evidence-based approach. *American journal of preventive medicine*, 22(4), 267-284.
28. Islam, J. Y., Zaman, M. M., Moniruzzaman, M., Shakoore, S. A., & Hossain, A. E. (2020). Estimation of total cardiovascular risk using the 2019 WHO CVD prediction charts and

- comparison of population-level costs based on alternative drug therapy guidelines: a population-based study of adults in Bangladesh. *BMJ open*, 10(7), e035842
29. Hasan, M. J. (2016). Pattern of drugs prescribed for treatment of hypertensive patients: Bangladesh. *African Journal of Pharmacy and Pharmacology*, 10(25), 521-525.
30. Chowdhury, A., Niloy, S. E. N., & Banik, S. (2017). Prescribing pattern of antidiabetic drugs in type 2 diabetic patients of Noakhali city in Bangladesh. *Marmara Pharmaceutical Journal*, 21(4), 1010-1014.
31. Elnaem, M. H., Mohamed, M. H. N., Huri, H. Z., & Shah, A. S. M. (2019). Effectiveness and prescription pattern of lipid-lowering therapy and its associated factors among patients with type 2 diabetes mellitus in Malaysian primary care settings. *Therapeutics and Clinical Risk Management*, 15, 137.
32. Nugent, R., Brower, E., Cravioto, A., & Koehlmoos, T. (2017). A cost-benefit analysis of a National Hypertension Treatment Program in Bangladesh. *Preventive medicine*, 105, S56-S61.
33. World Health Organization. 2011. Scaling up action against non-communicable diseases: how much will it cost? ISBN 978 92 4 150231 3
34. Haque R (2016). Costs and Benefits of addressing Diabetes and Smokeless Tobacco Consumption via Community Clinics. *Bangladesh Priorities*, Copenhagen Consensus Center, 2016. License: Creative Commons Attribution CC BY 4.0.
35. Joshi R, Alim M, Kengne AP, Jan S, Maulik PK, Peiris D, et al. Task shifting for non-communicable disease management in low and middle income countries--a systematic review. *PloS one*. 2014;9(8):e103754. Epub 2014/08/15. doi: 10.1371/journal.pone.0103754.
36. Krishnan, A., Finkelstein, E. A., Kallestrup, P., Karki, A., Olsen, M. H., & Neupane, D. (2019). Cost-Effectiveness and budget impact of the community-based management of hypertension in Nepal study (COBIN): a retrospective analysis. *The Lancet Global Health*, 7(10), e1367-e1374.
37. HEARTS Technical package for cardiovascular disease management in primary health care: team-based care. Geneva: World Health Organization; 2018 (WHO/NMH/ NVI/18.4). Licence: CC BY-NC-SA 3.0 IGO.
38. Rawal, L. B., Kanda, K., Biswas, T., Tanim, M. I., Poudel, P., Renzaho, A. M., ... & Ahmed, S. M. (2019). Non-communicable disease (NCD) corners in public sector health facilities in Bangladesh: a qualitative study assessing challenges and opportunities for improving NCD services at the primary healthcare level. *BMJ open*, 9(10), e029562.
39. Directorate General of Health Services (2020). *Health Bulletin 2019. Management Information System*, Director General of Health Services, Ministry of Health and Family Welfare, Government of the People's Republic of Bangladesh.
40. Bangladesh Bureau of Statistics (BBS). 2017. Preliminary report on Household Income and Expenditure Survey 2016. Statistics and Informatics Division (SID), Ministry of Planning. Government of the People's Republic of Bangladesh.
41. Bangladesh Bureau of Statistics (BBS). 2015. Report on Health and Morbidity Status Survey 2014. Statistics and Informatics Division (SID), Ministry of Planning. Government of the People's Republic of Bangladesh.

- 1  
2  
3 42. World Health Organization. 2013. National guidelines for management of hypertension in  
4 Bangladesh.  
5  
6 43. Director General of Health Services. DGHS. 2018. Multi-sectoral action plan for prevention and  
7 control of non-communicable diseases 2018-2025. (2018). Dhaka: Non-communicable Disease  
8 Control Programme, Directorate General of Health Services.  
9  
10 44. WHO Global Health Expenditure Database (<https://apps.who.int/nha/database/ViewData/Indicators/en>).  
11  
12 45. Biswas, T., Pervin, S., Tanim, M.I.A. et al. Bangladesh policy on prevention and control of non-  
13 communicable diseases: a policy analysis. BMC Public Health 17, 582 (2017).  
14 <https://doi.org/10.1186/s12889-017-4494-2>.  
15  
16  
17  
18  
19  
20  
21  
22  
23  
24  
25  
26  
27  
28  
29  
30  
31  
32  
33  
34  
35  
36  
37  
38  
39  
40  
41  
42  
43  
44  
45  
46  
47  
48  
49  
50  
51  
52  
53  
54  
55  
56  
57  
58  
59  
60

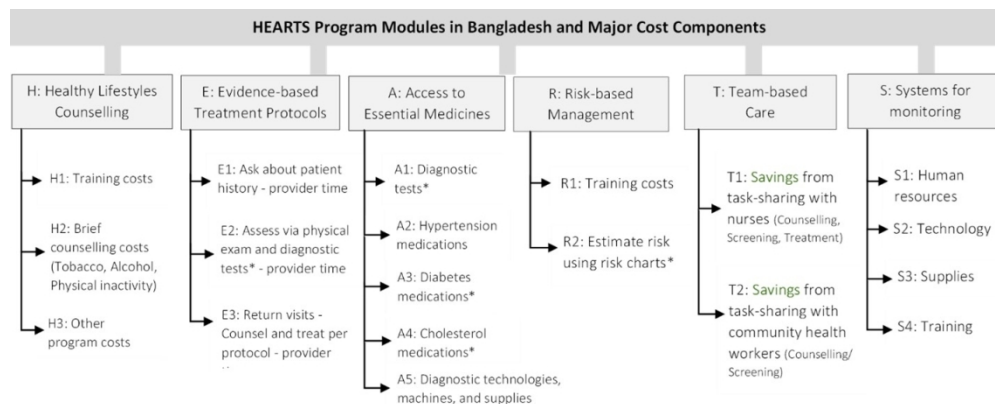

Cost components of the HEARTS program in Bangladesh

165x67mm (220 x 220 DPI)

1  
2  
3  
4  
5  
6  
7  
8  
9  
10  
11  
12  
13  
14  
15  
16  
17  
18  
19  
20  
21  
22  
23  
24  
25  
26  
27  
28  
29  
30  
31  
32  
33  
34  
35  
36  
37  
38  
39  
40  
41  
42  
43  
44  
45  
46  
47  
48  
49  
50  
51  
52  
53  
54  
55  
56  
57  
58  
59  
60

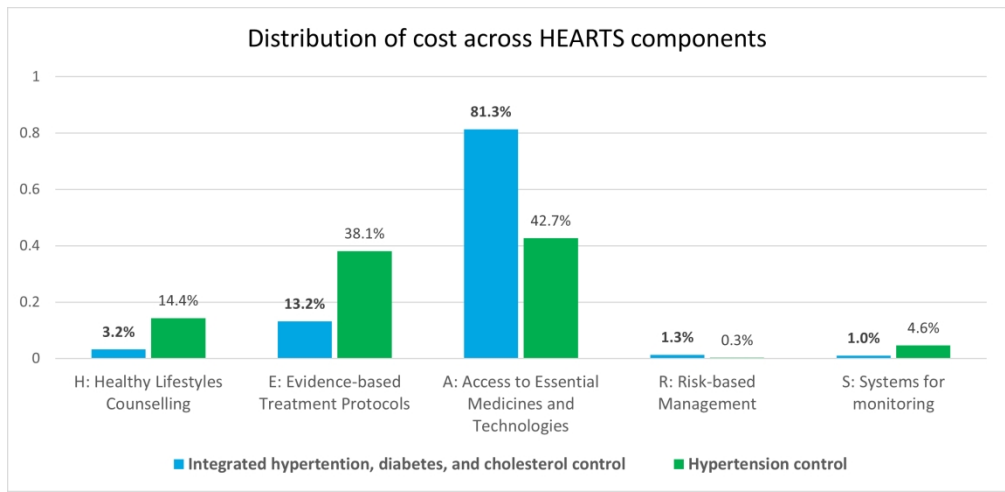

Distribution of annual cost by HEARTS components

495x240mm (130 x 130 DPI)



1  
2  
3  
4  
5  
6  
7  
8  
9  
10  
11  
12  
13  
14  
15  
16  
17  
18  
19  
20  
21  
22  
23  
24  
25  
26  
27  
28  
29  
30  
31  
32  
33  
34  
35  
36  
37  
38  
39  
40  
41  
42  
43  
44  
45  
46  
47  
48  
49  
50  
51  
52  
53  
54  
55  
56  
57  
58  
59  
60

## Bangladesh Hypertension Management Protocol for Primary Health Care Setting\*



Measure blood pressure of **all adults ≥ 18 years\*\***

If SBP is 140-159 mmHg or DBP 90-99 mmHg<sup>a</sup> → Advice for lifestyle modification  
 Review BP after 2 weeks. If SBP is still 140-159 mmHg or DBP 90-99 mmHg, **start drug treatment as below\*\*\***

**Step 1** Start amlodipine 5 mg<sup>b</sup> once daily.

**Step 2** Review after 1 month. If treatment target not met,<sup>c</sup> amlodipine 5 mg + losartan<sup>d</sup> 50 mg once daily.

**Step 3** Review after 1 month. If treatment target not met,<sup>c</sup> amlodipine 5 mg + losartan<sup>d</sup> 50 mg + hydrochlorothiazide 12.5 mg once daily<sup>e</sup>.

**Step 4** Review after 1 month. If treatment target not met,<sup>c</sup> refer to a specialist.

**Treatment Target Based on Levels of Blood Pressure**

| Most Patients                                                                         | ≤140/90 mmHg |
|---------------------------------------------------------------------------------------|--------------|
| Having Comorbidity (diabetes, ischemic heart disease, stroke, chronic kidney disease) | ≤130/80 mmHg |
| High CVD Risk > 30% (as per CVD risk prediction chart)                                | ≤130/80 mmHg |

**For Women of Childbearing Age Who May Become Pregnant**

Step 1: Start amlodipine 5 mg<sup>b</sup> once daily.  
 Step 2: Review after 1 month. If treatment target not met,<sup>c</sup> amlodipine 10 mg once daily.  
 Step 3: Review after 1 month. If treatment target not met,<sup>c</sup> refer to specialist.

**⚠ DO NOT PRESCRIBE losartan or any ACE inhibitor or ARB to women who may become pregnant.**

**Advice for lifestyle modification**



Avoid alcohol and tobacco, including secondhand smoke



Exercise 2.5 hr/week



Eat a low salt diet (under 1 tsp/day)



Eat a heart-healthy diet

If overweight, lose weight. Eat at least 5 servings of vegetables/fruit per day. Use healthy oils, such as sesame (til), olive, safflower, sunflower. Eat nuts, peas, whole grains and foods rich in potassium like spinach, watermelon, yogurt and banana.

Limit red meat to once or twice per week at most. Eat fish or other food rich in omega 3 fatty acids at least twice per week. Avoid added sugar from cakes, cookies, sweets, fizzy drinks.

**Footnotes:**

a. For patients with SBP ≥160 mmHg or DBP ≥ 100 mmHg, start immediate treatment at step 2 (amlodipine 5 mg + losartan 50 mg).

b. Consider amlodipine 2.5 mg as a starting dose for the elderly or patients with low body weight.

c. Check that the patient has been taking drugs regularly and correctly.

d. Before initiating and several weeks after starting losartan, check serum creatinine and serum potassium. Avoid losartan for women of childbearing age who may become pregnant.

e. Consider the option of increasing losartan to 100 mg before proceeding to step 3, and continuing the dose of losartan 100 mg for step 3.

\* Adapted from National Protocol for Management of Diabetes and Hypertension, NCD programme, DGHS MOHFW 2018-19.

\*\* For patients aged ≥ 40 years, decision to treat high blood pressure may be taken based on total cardiovascular disease (CVD) risk estimation.

\*\*\* This protocol should not be used for pregnant patients. If patient is pregnant, refer to a specialist.




533x753mm (173 x 173 DPI)

# BMJ Open

## Cost of primary care approaches for hypertension management and risk-based cardiovascular disease prevention in Bangladesh: a HEARTS costing tool application

|                                 |                                                                                                                                                                                                                                                                                                                                                                                                                                                                                                                                                                                                                                                                                                                                                                                                                                                                                                                                           |
|---------------------------------|-------------------------------------------------------------------------------------------------------------------------------------------------------------------------------------------------------------------------------------------------------------------------------------------------------------------------------------------------------------------------------------------------------------------------------------------------------------------------------------------------------------------------------------------------------------------------------------------------------------------------------------------------------------------------------------------------------------------------------------------------------------------------------------------------------------------------------------------------------------------------------------------------------------------------------------------|
| Journal:                        | <i>BMJ Open</i>                                                                                                                                                                                                                                                                                                                                                                                                                                                                                                                                                                                                                                                                                                                                                                                                                                                                                                                           |
| Manuscript ID                   | bmjopen-2022-061467.R2                                                                                                                                                                                                                                                                                                                                                                                                                                                                                                                                                                                                                                                                                                                                                                                                                                                                                                                    |
| Article Type:                   | Original research                                                                                                                                                                                                                                                                                                                                                                                                                                                                                                                                                                                                                                                                                                                                                                                                                                                                                                                         |
| Date Submitted by the Author:   | 03-Jun-2022                                                                                                                                                                                                                                                                                                                                                                                                                                                                                                                                                                                                                                                                                                                                                                                                                                                                                                                               |
| Complete List of Authors:       | Husain, Muhammad ; Centers for Disease Control and Prevention, Division of Global Health Protection, Centers for Global Health Haider, Mohammad; Ministry of Health and Family Welfare, Directorate General of Health Services<br>Tarannum, Renesa; National Heart Foundation Hospital & Research Institute, Department of Epidemiology and Research<br>Jubayer, Shamim; National Heart Foundation Hospital & Research Institute, Department of Epidemiology and Research<br>Bhuiyan, Mahfuzur ; National Heart Foundation Hospital and Research Institute, Department of Epidemiology and Research<br>Kostova, Deliana; Centers for Disease Control and Prevention, Division of Global Health Protection, Centers for Global Health<br>Moran, Andrew ; Resolve to Save Lives, an initiative of Vital Strategies<br>Choudhury, Sohel Reza; National Heart Foundation Hospital & Research Institute, Department of Epidemiology & Research |
| <b>Primary Subject Heading</b>: | Health economics                                                                                                                                                                                                                                                                                                                                                                                                                                                                                                                                                                                                                                                                                                                                                                                                                                                                                                                          |
| Secondary Subject Heading:      | Health services research, Cardiovascular medicine, Evidence based practice, Global health                                                                                                                                                                                                                                                                                                                                                                                                                                                                                                                                                                                                                                                                                                                                                                                                                                                 |
| Keywords:                       | Hypertension < CARDIOLOGY, HEALTH ECONOMICS, International health services < HEALTH SERVICES ADMINISTRATION & MANAGEMENT, PUBLIC HEALTH                                                                                                                                                                                                                                                                                                                                                                                                                                                                                                                                                                                                                                                                                                                                                                                                   |
|                                 |                                                                                                                                                                                                                                                                                                                                                                                                                                                                                                                                                                                                                                                                                                                                                                                                                                                                                                                                           |

SCHOLARONE™  
Manuscripts

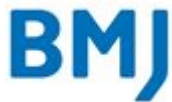

I, the Submitting Author has the right to grant and does grant on behalf of all authors of the Work (as defined in the below author licence), an exclusive licence and/or a non-exclusive licence for contributions from authors who are: i) UK Crown employees; ii) where BMJ has agreed a CC-BY licence shall apply, and/or iii) in accordance with the terms applicable for US Federal Government officers or employees acting as part of their official duties; on a worldwide, perpetual, irrevocable, royalty-free basis to BMJ Publishing Group Ltd ("BMJ") its licensees and where the relevant Journal is co-owned by BMJ to the co-owners of the Journal, to publish the Work in this journal and any other BMJ products and to exploit all rights, as set out in our [licence](#).

The Submitting Author accepts and understands that any supply made under these terms is made by BMJ to the Submitting Author unless you are acting as an employee on behalf of your employer or a postgraduate student of an affiliated institution which is paying any applicable article publishing charge ("APC") for Open Access articles. Where the Submitting Author wishes to make the Work available on an Open Access basis (and intends to pay the relevant APC), the terms of reuse of such Open Access shall be governed by a Creative Commons licence – details of these licences and which [Creative Commons](#) licence will apply to this Work are set out in our licence referred to above.

Other than as permitted in any relevant BMJ Author's Self Archiving Policies, I confirm this Work has not been accepted for publication elsewhere, is not being considered for publication elsewhere and does not duplicate material already published. I confirm all authors consent to publication of this Work and authorise the granting of this licence.

## Cost of primary care approaches for hypertension management and risk-based cardiovascular disease prevention in Bangladesh: a HEARTS costing tool application

Muhammad Jami Husain<sup>1\*</sup>, Mohammad Sabbir Haider<sup>2</sup>, Renesa Tarannum<sup>3</sup>, Shamim Jubayer<sup>3</sup>, Mahfuzur Rahman Bhuiyan<sup>3</sup>, Deliana Kostova<sup>1</sup>, Andrew E. Moran<sup>4</sup>, Sohel Reza Choudhury<sup>3</sup>

<sup>1</sup> Division of Global Health Protection, Centers for Global Health, Centers for Disease Control and Prevention, Atlanta, USA

<sup>2</sup> Directorate General of Health Services, Ministry of Health and Family Welfare, Dhaka, Bangladesh

<sup>3</sup> Department of Epidemiology and Research, National Heart Foundation Hospital & Research Institute, Dhaka, Bangladesh

<sup>4</sup> Resolve to Save Lives, an initiative of Vital Strategies, New York, USA.

\* Corresponding author: Muhammad Jami Husain, PhD. Email: [mhusain@cdc.gov](mailto:mhusain@cdc.gov)

### Abstract

**Objective:** To estimate the costs of scaling up the HEARTS pilot project for hypertension management and risk-based cardiovascular disease prevention at the full population level in the four sub-districts (upazilas) in Bangladesh.

**Settings:** Two intervention scenarios in sub-district health complexes: hypertension management only, and risk-based integrated hypertension, diabetes, and cholesterol management.

**Design:** Data obtained during July-August 2020 from sub-district health complexes on the cost of medications, diagnostic materials, staff salaries, and other program components.

**Methods:** Program costs were assessed using the HEARTS costing tool, an Excel-based instrument to collect, track, and evaluate the incremental annual costs of implementing the HEARTS program from the health system perspective.

**Primary and secondary outcome measures:** Program cost, provider time.

**Results:** The total annual cost for the hypertension control program was estimated at USD 3.2 million, equivalent to USD 2.8 per capita or, USD 8.9 per eligible patient. The largest cost share (USD 1.35 million; 43%) was attributed to the cost of medications, followed by the cost of provider time to administer treatment (38%). The total annual cost of the risk-based integrated management program was projected at USD 14.4 million, entailing USD 12.9 per capita or USD 40.2 per eligible patient. The estimated annual costs per patient treated with medications for hypertension, diabetes, and cholesterol were USD 18, USD 29, and USD 37, respectively.

**Conclusion:** Expanding the HEARTS hypertension management and CVD prevention program to provide services to the entire eligible population in the catchment area may face constraints in physician capacity. A task-sharing model involving shifting of select tasks from doctors to nurses and local community health workers would be essential for the eventual scale-up of primary care services to prevent CVD in Bangladesh.

**Key Words:** Program cost; HEARTS hypertension management and CVD prevention program; scale-up of primary care services; Bangladesh.

**Word Count:** 4430

### Strengths and limitations of this study

- This study uses the HEARTS costing tool to assess the expected cost of scaling up the program to all eligible adults in the participating sub-districts (upazila).
- The study assesses two program scenarios: a hypertension management program and an integrated risk-based hypertension, diabetes, and cholesterol management program.
- The study disaggregates costs by function, identifying areas for efficiency improvements, such as task-sharing and bridging program delivery from the upazila level to more localized community facilities.
- Due to lack of data at a local level, the cost projections rely on assumptions regarding population coverage, risk factor prevalence, primary care attendance rate, distribution of CVD risk among the population, distribution of patients by treatment protocols, and frequency of patient visits by CVD risk.
- The study uses average medicine prices, unit costs of supplies, wages, and provider time, which may vary across sub-districts depending on the procurement arrangements and operational efficiency.

## 1. BACKGROUND

Hypertension is a major and preventable risk factor for cardiovascular disease (CVD). An estimated 1.13 billion people (1 in 4 men and 1 in 5 women) worldwide have hypertension. [1] Among people with hypertension worldwide, fewer than 1 in 5 have it under control.[1] High blood pressure is a leading global risk factor for premature death and disability, accounting for about 10 million (or 1 in 6) deaths worldwide each year.[2, 3] Uncontrolled hypertension significantly increases the risk of stroke, myocardial infarction, heart failure, dementia, renal failure, retinopathy, and other diseases.[4-7] Almost half of all CVD events are attributable to uncontrolled hypertension.[2, 3]

Reducing the prevalence of hypertension is a standing global health objective.[8-11] This objective complements the 2030 Sustainable Development Goal (SDG) of reducing premature deaths from noncommunicable diseases (NCDs) by 25%.[12] Low- and middle-income countries (LMICs), where two-thirds of all hypertension cases reside, are increasingly cognizant of the long-term benefits of addressing hypertension in their populations. However, implementing population-level measures targeting hypertension may present challenges for many LMICs where health systems have traditionally focused on infectious diseases and where the capacity for NCD care may be limited.

Bangladesh is among lower-middle-income countries with a high burden of hypertension. In 2018, the prevalence of elevated blood pressure (SBP and/or DBP  $\geq$  140/90 mmHg) among adults in Bangladesh was 21%.[13-15]. According to the 2011 Bangladesh National Demographic and Health Survey, of 14.4 million hypertensive people (adults aged 35 and above), only 7.3 million (51%) were aware of their condition, 41% were treated, and 18% had their blood pressure levels under control.[16] The burden of hypertension in Bangladesh is expected to grow alongside increased population aging, rapid urbanization with commensurate increases in sedentary lifestyle and processed food consumption, and other socio-economic and lifestyle changes. However, only less than 5 percent of the health sector program budget is allocated for NCDs control.[16] This demonstrates the need for an effective, low-cost and efficient population-level approach in addressing hypertension.

In 2016, WHO introduced the HEARTS technical package as a framework for CVD prevention at the primary care level.[17] The HEARTS technical package consists of guidelines for implementing a primary-care approach to CVD management, focusing on screening and management of CVD risk factors, including lifestyle modification and pharmacological treatment of metabolic risk factors such as hypertension, diabetes, and hyperlipidemia. In this paper, we describe the local budgetary impact of implementing the HEARTS program at the population level for four sub-districts in Bangladesh, based on program cost data obtained from a representative health care facility in each sub-district. Although the

1  
2  
3 initial focus of the program in the four sub-districts is presently limited to hypertension control, scaling-up  
4 of the initiative may include screening, diagnosis, and treatment of diabetes and high cholesterol.  
5  
6 Understanding the cost drivers of CVD prevention approaches in the Bangladesh primary care system can  
7  
8 support budgeting, procurement, evaluation, and planning for scale-up.  
9

## 10 **2. METHODS**

### 11 *2.1. Setting*

12  
13  
14  
15 In 2018, the Directorate General of Health Services and the National Heart Foundation of Bangladesh  
16 collaborated with Resolve to Save Lives (RTSL, an initiative of Vital Strategies, a non-profit global public  
17 health organization) to implement a pilot program to strengthen the detection, treatment, and follow-up  
18 management of hypertension in primary care. The program was introduced in four health complexes in four  
19 sub-districts (upazilas) in the Sylhet district: Golapganj, Fenchuganj, Beanibazar, and Bishwanath. In  
20 Bangladesh, hospitals and health facilities that are in the sub-district (upazila) level or below are termed as  
21 primary health complexes. A typical upazila health complex is a 50-bed hospital with service coverage in  
22 the range of 100,000 to 400,000 population and plays a pivotal role in the provision of primary health care  
23 through a three-tier system consisting of the ward level, union level, and upazila level. The upazila health  
24 complex performs a wide range of functions that includes prevention, promotion, treatment (in-patient, out-  
25 patient, limited diagnostic services), management, technical support, training, coordination, and patient  
26 referral services. The outpatient service is usually staffed with five outpatient general practitioners  
27 including 1 resident medical officer, 2 medical officers, and 2 medical assistants. An ‘NCD corner’ was set-  
28 up in the outpatient with necessary logistics and personnel for screening and treatment. We project program  
29 costs under two intervention scenarios: a hypertension-focused program, and a risk-based integrated  
30 hypertension, diabetes, and cholesterol management program.  
31  
32  
33  
34  
35  
36  
37  
38  
39  
40

### 41 *2.2. Patient and Public Involvement*

42  
43  
44 Patients or the public were not involved in the design, conduct, reporting, or dissemination plans of  
45 this research.  
46  
47

### 48 *2.3. Hypertension management program*

49  
50  
51 The HEARTS Technical Package for CVD prevention in primary care is organized around six  
52 modules: H—Healthy-lifestyle counselling, E—Evidence-based treatment protocols, A—Access to essential  
53 medicines and technology, R—Risk-based CVD management, T—Team-based Care, and S—Systems for  
54 monitoring.[18] Components of these modules are described in Figure 1. In the four upazila primary care  
55  
56  
57  
58  
59  
60



1  
2  
3 complexes in Bangladesh, programmed activities included: training of staff in following a standard treatment  
4 protocol, record keeping and reporting; ensuring adequate supply of necessary drugs; community outreach  
5 to increase awareness of the need for hypertension screening; introduction of patient monitoring tools and a  
6 monthly reporting system; and establishing a mechanism for patient referral from primary care to secondary  
7 care and tertiary care at MAG Osmani Medical College. The clinical management protocol for adults with  
8 hypertension (defined as SBP/DBP  $\leq$  140/90 mmHg, or SBP/DBP  $\leq$  130/80 mmHg with co-morbidity or  
9 high CVD-risk) entailed a first line of treatment with amlodipine 5mg daily; a second line of treatment using  
10 amlodipine 5mg plus losartan 50mg daily; and a third line of treatment using amlodipine 5mg plus losartan  
11 50mg plus hydrochlorothiazide 12.5mg daily. Appendix 1 depicts the hypertension treatment protocol. The  
12 prescribed medicines are typically obtained by public health facilities, generic, domestically manufactured,  
13 and provided free of charge to patients. The national drug policy recommends that 70% of the public sector  
14 medicines be purchased from the state-owned Essential Drug Company Limited (EDCL), 25% from the  
15 Central Medical Stores Depot (CMSD), and 5% from local sources.[19, 20] In order to provide continuous  
16 care more sustainably and to reduce burden on physicians, a team-based care strategy was implemented. The  
17 healthcare providers were trained to acquire the necessary skills to provide brief interventions to record  
18 patients' medical history, measuring blood pressure (BP), point-of-care testing to assess fasting blood glucose  
19 and cholesterol levels and urine dipstick for proteinuria, encourage behavior change, assess CVD risk, or  
20 initiate treatment protocol. The training sessions were conducted in one set-up with a pool of selected doctors,  
21 nurses, and community health workers trained with relevant modules. In this approach, community health  
22 workers (CHW) were trained to provide counselling and some screening services along with the doctors and  
23 nurses. For the costing estimate, equal burden sharing in terms of provider time was assumed.

#### 24 25 26 27 28 29 30 31 32 33 34 35 36 37 38 39 40 41 42 43 44 45 46 47 48 49 50 51 52 53 54 55 56 57 58 59 60

2.4. *Risk-based integrated hypertension, diabetes, and hyperlipidemia management program*

To further strengthen CVD prevention, the HEARTS program in Bangladesh also planned to integrate diabetes and hyperlipidemia management in addition to hypertension management in primary care patients. The program entails assessment of target population by total CVD risk estimation to categorize their risk for CVD. The risk-stratification is based on WHO and International Society of Hypertension cardiovascular risk prediction charts and expressed as the probability of developing CVD over 10 years: low CVD risk (0 to  $<$ 10%); medium CVD risk (10 to 20%); and high CVD risk ( $\geq$ 20%).[21] The treatment protocol for patients with uncomplicated type 2 diabetes (defined as fasting plasma glucose (FPG)  $\geq$  7.0 mmol/l or routine plasma glucose (RPG)  $\geq$  11.1 mmol/l or HbA1C  $\geq$  6.5%) managed at the primary care level included Metformin (500 mg), Metformin (1000 mg), then Metformin (1000 mg) and Gliclazide (80 mg) as the first, second, and third lines of treatments, respectively. The protocol is based on the WHO guidance on diagnosis, classification, and management of diabetes (HEARTS - D), which is

1  
2  
3 aligned with the WHO Package of Essential Noncommunicable Disease Interventions in Primary Health  
4 Care (WHO-PEN).[22] For managing plasma lipid levels (i.e., high cholesterol), the use of statins as the  
5 primary therapy is widely recommended, however, the WHO is yet to offer any specific guidance.[23]. For  
6 costing, the local consultants and experts proposed a statin-based treatment protocol for hyperlipidemia  
7 including simvastatin (10 mg) as first, atorvastatin (20 mg) as second, and atorvastatin (40 mg) as the third  
8 line of treatment. Costs associated with implementing integrated hypertension, diabetes, and  
9 hyperlipidemia treatment protocols include provider time spent on estimating CVD risk using risk charts  
10 during an annual primary care visit; training in CVD risk estimation, in addition to time spent collecting  
11 patient history; medication costs; and diagnostic test costs including provider (technician) time, complete  
12 blood count panel, fasting blood glucose, and blood lipid panel tests.  
13  
14  
15  
16  
17  
18

### 19 20 *2.5. HEARTS Costing Tool*

21  
22 Program costs were assessed using the HEARTS costing tool, an Excel-based instrument to collect,  
23 track, and evaluate the incremental annual cost of implementing the HEARTS program from the health  
24 system perspective. The tool is organized by HEARTS modules.[24]. In July-August 2020, we obtained  
25 unit costs from four upazila complexes and used these to project annual resource needs for implementing  
26 the CVD prevention program at the sub-district population level. The researchers completed in-person  
27 collection of data from the four facilities on human resource and time costs, diagnostic prices, time-motion  
28 on laboratory diagnostics, market price of medicines, and others.  
29  
30  
31  
32  
33

34 Figure 1 shows major cost categories within HEARTS modules. Once program costs and other inputs  
35 such as population coverage, risk factor prevalence, and planned provider numbers were entered into the  
36 costing tool, the cost calculations were allocated across different HEARTS modules.  
37  
38  
39

#### 40 **Figure 1: Cost components of the HEARTS program in Bangladesh**

41  
42  
43 The cost elements in the Healthy-lifestyle counselling module 'H' included costs of training  
44 providers in lifestyle counseling and costs of community awareness programs and training. Counselling is  
45 based on the '5 As' (Assess, Advise, Agree, Assist, Arrange) model, which is an evidence-based approach  
46 for promoting healthy behavioral changes to prevent NCD risk factors.[25, 26] Total provider time to  
47 administer brief counseling was equal to the average time that the health provider spends to counsel a  
48 patient to change behavior multiplied by the total number of patients who would receive counselling. The  
49 cost of total provider time was calculated as the total provider time, multiplied by the weighted average  
50 salary of the health providers who have been trained to provide counselling.  
51  
52  
53  
54  
55  
56  
57  
58  
59  
60

1  
2  
3 The cost elements in Module 'E' included provider time devoted to assessing patient history,  
4 conducting physical exams and diagnostic tests, and return visits. The costs of diagnostic tests (complete  
5 blood count panel, blood lipid panel, fasting blood glucose), medications (hypertension, diabetes, and  
6 cholesterol), and on-site diagnostic technologies and supplies were assessed under Module 'A'. Module 'R'  
7 reports the costs of training providers in conducting risk-based management and the cost of provider time  
8 for estimating patient CVD risk using risk charts. Module "T" reports cost savings from task-sharing by  
9 comparing the cost that could have been incurred if the tasks were performed solely by the physicians with  
10 costs incurred through task-sharing among physicians, nurses, and CHW. Therefore, in the baseline  
11 scenario (i.e., in the absence of task-sharing allocation), the costing tool assumes a physician-led program.  
12 In our cost projections, we assumed that doctors, nurses, and CHWs will equally share the tasks (i.e.,  
13 provider time) when applicable. For instance, CHWs would only provide behavioral counselling and  
14 screening service, but they would not assess CVD risk (using risk-chart), or prescribe patients with  
15 pharmacologic treatments. Accordingly, the provider time allocated for behavior counselling and screening  
16 will be shared equally among doctors, nurses, and CHWs. Nurses will be trained to do major tasks (i.e.,  
17 counselling, screening, and assessing CVD risk, and treating according to CVD risk), therefore providers'  
18 time for performing HTN/CVD risk-assessment, prescribing suitable treatment, and return-visits were  
19 allocated equally between doctors and nurses. While the 'T' module reports the cost savings from team-  
20 based care, The accrued cost of provider time (inclusive of doctors, nurses, and CHWs) spent on various  
21 tasks is included in the corresponding 'H', 'E', and 'R' modules. Module 'S' reports costs related to human  
22 resources, technology (software and hardware), supplies, and training for patient monitoring.  
23  
24  
25  
26  
27  
28  
29  
30  
31  
32  
33  
34

## 35 2.6. Data

36  
37  
38 Data on salaries of government healthcare providers and program staff were collected from in-person  
39 interviews and/or records. Total salary was calculated according to the Government of Bangladesh National  
40 pay scale. Size of the population in the examined sub-districts was obtained from census and imputed based  
41 on Bangladesh Bureau of Statistics (BBS) estimates. Other population parameters (e.g., primary care  
42 attendance rate and risk factor prevalence) were obtained from the nationally representative NCD Risk  
43 Factor Survey 2018.[15] Medicine prices were collected from the medicine outlets in the public hospitals.  
44 The unit prices represent the average price of domestically manufactured generic medicines procured by  
45 health facilities from EDCL or CMSD. Prices of laboratory diagnostics were collected from diagnostic labs  
46 at the district (Sylhet district) and sub-district (upazila) levels. Data on time needed to conduct laboratory  
47 tests were collected from in-person interviews of laboratory personnel. Training data, including number of  
48 training and participants, per-diem costs of staff, costs related to rent, transport, refreshments, and other  
49 logistics, were collected from the respective project records.  
50  
51  
52  
53  
54  
55  
56  
57  
58  
59  
60

Table 1 presents the prevalence of CVD risk factors as well as cost inputs used to populate the HEARTS costing tool. 15% of the adult population was estimated to be at high risk for CVD. The leading risk factors were tobacco use (43.7%), hyperlipidemia (28.4%) and hypertension (21%), followed by physical inactivity (12.3%), diabetes (8.3%) and alcohol consumption (4.4%).; The primary care attendance rate was assumed to be 47.9% in each upazila.[15] The distributions of patients by CVD risks and for the pharmacological treatment of hypertension, diabetes, and cholesterol by different treatment lines were adopted from the literature and/or based on local physician consensus. [27-30] Local currency was converted to US dollars using the Bangladesh Bank official conversion rate in June 2020.

**Table 1: Costing inputs and unit costs**

| Input Description                                                      | Units            | Value              |
|------------------------------------------------------------------------|------------------|--------------------|
| <b>Eligible population (Adult population (18+))</b>                    |                  |                    |
| - Golapganj                                                            | Persons          | 261,098            |
| - Fenchuganj                                                           | Persons          | 86,503             |
| - Beanibazar                                                           | Persons          | 209,454            |
| - Bishwanath                                                           | Persons          | 192,075            |
| <b>Primary healthcare attendance rate (annual)</b>                     | Percent          | 47.9%              |
| <b>Adult population with risk factors</b>                              |                  |                    |
| - Use of tobacco products                                              | Percent          | 43.7%              |
| - Hazardous or harmful use of alcohol                                  | Percent          | 4.4%               |
| - Physical inactivity                                                  | Percent          | 12.3%              |
| - Hypertension ( $\geq 140/90$ mmHg)                                   | Percent          | 21.0%              |
| - Diabetes ( $\geq 7.0$ mmol/L or 126 mg/dl)                           | Percent          | 8.3%               |
| - Hyperlipidemia ( $\geq 6$ mmol/L or 190 mg/dl)                       | Percent          | 28.4%              |
| - Low CVD risk (0 to <10%)                                             | Percent          | 85.1%              |
| - Medium CVD risk (10 to <20%)                                         | Percent          | 14.4%              |
| - High CVD risk ( $\geq 20\%$ )                                        | Percent          | 0.5%               |
| <b>Annual wage (in LCU (BDT) and USD, including benefits)</b>          |                  |                    |
| - Doctors                                                              | BDT (USD)/year   | 1,399,452 (16,484) |
| - Nurses                                                               | BDT (USD)/year   | 726,360 (8,555)    |
| - CHWs                                                                 | BDT (USD)/year   | 486,568 (5,731)    |
| - Lab technicians                                                      | BDT (USD)/year   | 576,720 (6,793)    |
| - Accountant                                                           | BDT (USD)/year   | 576,720 (6,793)    |
| - Administrative Assistant                                             | BDT (USD)/year   | 446,242 (5,256)    |
| - Clerical Officer                                                     | BDT (USD)/year   | 446,242 (5,256)    |
| - Custodian                                                            | BDT (USD)/year   | 446,242 (5,256)    |
| - IT Personnel                                                         | BDT (USD)/year   | 446,242 (5,256)    |
| - Program Director                                                     | BDT (USD)/year   | 1,399,452 (16,484) |
| - Program Manager                                                      | BDT (USD)/year   | 726,300 (8,555)    |
| - Secretary                                                            | BDT (USD)/year   | 446,242 (5,256)    |
| - Security officer                                                     | BDT (USD)/year   | 400,196 (4,714)    |
| - Pharmacist/Chemist                                                   | BDT (USD)/year   | 576,720 (6,793)    |
| - Statistician                                                         | BDT (USD)/year   | 576,720 (6,793)    |
| - Supplies manager                                                     | BDT (USD)/year   | 486,568 (5,731)    |
| <b>Purchasing price (in LCU (BDT) and USD) of pharmaceutical drugs</b> |                  |                    |
| <i>Hypertension Medicine</i>                                           |                  |                    |
| - amlodipine 5mg                                                       | BDT (USD)/tablet | 1 (0.012)          |
| - losartan 50mg                                                        | BDT (USD)/tablet | 8 (0.094)          |
| - hydrochlorothiazide                                                  | BDT (USD)/tablet | 0.35 (0.004)       |
| <i>Diabetes Medicine</i>                                               |                  |                    |
| - metformin 500mg                                                      | BDT (USD)/tablet | 4 (0.047)          |
| - metformin 1000mg                                                     | BDT (USD)/tablet | 9 (0.106)          |
| - gliclazide                                                           | BDT (USD)/tablet | 3.5 (0.041)        |
| <i>Cholesterol Medicine</i>                                            |                  |                    |
| - simvastatin 10mg                                                     | BDT (USD)/tablet | 7 (0.082)          |
| - atorvastatin 20mg                                                    | BDT (USD)/tablet | 10 (0.118)         |
| - atorvastatin 40mg                                                    | BDT (USD)/tablet | 28 (0.330)         |
| <b>Purchasing price (in LCU) of diagnostic tests</b>                   |                  |                    |
| - Diabetes (Complete blood count - panel)                              | BDT (USD)/test   | 400 (4.71)         |
| - Diabetes (Fasting blood glucose)                                     | BDT (USD)/test   | 120 (1.41)         |

|                                                                                                |                    |              |
|------------------------------------------------------------------------------------------------|--------------------|--------------|
| - Diabetes and Cholesterol (Blood lipid panel)                                                 | BDT (USD)/test     | 800 (9.42)   |
| <b>Counselling patients to change behavior</b>                                                 |                    |              |
| - Time to counsel a patient to change behavior                                                 | Minutes            | 10           |
| - # of 'How to quit' informational materials disseminated per person, annually (print)         | Print              | 5            |
| - Cost of 'How to quit' informational materials, per unit (print materials)                    | BDT (USD)/print    | 20 (0.24)    |
| <b>LCU to USD exchange rate</b>                                                                |                    |              |
| "Safety stock" required to be on hand for medicines                                            | BDT/USD            | 84.9         |
|                                                                                                | Percent            | 3.0          |
| <b>Number of health providers in need of training</b>                                          |                    |              |
| - Counsel patients to change behavior                                                          | Persons            | 30           |
| - Assess patients' total CVD risk                                                              | Persons            | 10           |
| <b>Training to counsel patients to change behavior (5A's)*</b>                                 |                    |              |
| - Classroom size                                                                               | Persons            | 30           |
| - Hours of training needed                                                                     | Persons            | 16           |
| <b>Training to screen/diagnosis/treat patients Hypertension/CVD patients</b>                   |                    |              |
| - Classroom size                                                                               | Persons            | 30           |
| - Hours of training needed                                                                     | Persons            | 8            |
| <b>Number of Trainers</b>                                                                      |                    |              |
| - Professional trainer(s)                                                                      | Persons            | 2            |
| - Administrative staff                                                                         | Persons            | 1            |
| <b>Input costs for training</b>                                                                |                    |              |
| <i>Hourly wage</i>                                                                             |                    |              |
| - Professional trainer                                                                         | BDT (USD)/hour     | 500 (5.89)   |
| - Administrative staff                                                                         | BDT (USD)/hour     | 250 (2.94)   |
| <i>Per unit cost of materials</i>                                                              |                    |              |
| - Instructive handbooks                                                                        | BDT (USD)/book     | 1000 (11.8)  |
| - Facility rental for training (one day)                                                       | BDT (USD)/day      | 9000 (106)   |
| - Refreshments                                                                                 | BDT (USD)/day      | 6000 (70.7)  |
| - Per diem for staff                                                                           | BDT (USD)/day      | 3500 (41.2)  |
| - Per diem and/or salary of trainees                                                           | BDT (USD)/day      | 5000 (58.9)  |
| - Transportation stipend for staff                                                             | BDT (USD)/training | 3165 (37.3)  |
| <b>CVD Risk Screening and Diagnosis</b>                                                        |                    |              |
| Time (in minutes) a health provider spends to:                                                 |                    |              |
| - Screen patients for total CVD risk                                                           | Minutes            | 5            |
| - Provide a physical exam to assess patients' total CVD risk                                   | Minutes            | 5            |
| - Assess patient risk using a CVD risk chart                                                   | Minutes            | 5            |
| Time (in minutes) a lab technician spends to:                                                  |                    |              |
| - Administer and analyze a blood test                                                          | Minutes            | 10           |
| - Administer and analyze a urine test                                                          | Minutes            | 10           |
| <b>Treatment for High CVD Risk</b>                                                             |                    |              |
| <b># follow-up visits for a person annually with the following levels of CVD risk annually</b> |                    |              |
| - Low CVD risk ( $\geq 0\%$ to $< 10\%$ )                                                      | Visits             | 2            |
| - Medium CVD risk ( $\geq 10\%$ to $< 20\%$ )                                                  | Visits             | 3            |
| - High CVD risk ( $\geq 20\%$ )                                                                | Visits             | 4            |
| Time health providers spend with a patient during a visit?                                     |                    |              |
| - Generalists/primary care doctors                                                             | Minutes            | 5            |
| - Nurses                                                                                       | Minutes            | 5            |
| <b>Screen for CVD risk: Diagnostics cost in LCU (BDT) and USD</b>                              |                    |              |
| - Diabetes (complete blood count panel)                                                        | BDT (USD)/test     | 400 (4.7)    |
| - Diabetes (Fasting blood glucose)                                                             | BDT (USD)/test     | 120 (1.4)    |
| - Diabetes and Cholesterol (Blood lipid panel)                                                 | BDT (USD)/test     | 80 (0.9)     |
| <b>Pharmacological treatment for hypertension</b>                                              |                    |              |
| - Hypertension Protocol Step #1 (Amlodipine 5mg, 1 per day, 365 days)                          |                    |              |
| - % of all individuals with high blood pressure who receive this treatment regimen             | Percent            | 62%          |
| - Hypertension Protocol Step #2 (Amlodipine 5mg + Losartan 50mg)                               |                    |              |
| - % of all individuals with high blood pressure who receive this treatment regimen             | Percent            | 34%          |
| - Hypertension Protocol Step #3 (Amlodipine + Losartan+ Hydrochlorothiazide)                   |                    |              |
| - % of all individuals with high blood pressure who receive this treatment regimen             | Percent            | 4%           |
| - Unit price of amlodipine 5mg in LCU (Taka or BDT) and USD                                    | BDT (USD)/tablet   | 1 (0.012)    |
| - Unit price of losartan 50 mg in LCU (Taka or BDT) and USD                                    | BDT (USD)/tablet   | 8 (0.094)    |
| - Unit price of hydrochlorothiazide in LCU (Taka or BDT) and USD                               | BDT (USD)/tablet   | 0.35 (0.004) |
| <b>Pharmacological treatment for diabetes</b>                                                  |                    |              |
| - Diabetes Protocol Step #1 (metformin 500mg)                                                  |                    |              |
| - % of all individuals with diabetes who receive this treatment regimen                        | Percent            | 75%          |
| - Diabetes Protocol Step #2 (metformin 1000mg)                                                 |                    |              |
| - % of all individuals with diabetes who receive this treatment regimen                        | Percent            | 15%          |
| - Diabetes Protocol Step #3 (metformin 1000mg+gliclazide 8mg)                                  |                    |              |
| - % of all individuals with diabetes who receive this treatment regimen                        | Percent            | 10%          |
| - Unit price of metformin 500mg in LCU (Taka or BDT) and USD                                   | BDT (USD)/tablet   | 4 (0.047)    |

|                                                                          |                                                                             |                  |             |
|--------------------------------------------------------------------------|-----------------------------------------------------------------------------|------------------|-------------|
| -                                                                        | Unit price of metformin 1000mg in LCU (Taka or BDT) and USD                 | BDT (USD)/tablet | 9 (0.106)   |
| -                                                                        | Unit price of gliclazide 80mg in LCU (Taka or BDT) and USD                  | BDT (USD)/tablet | 3.5 (0.041) |
| <b>Pharmacological treatment for high cholesterol (default regimens)</b> |                                                                             |                  |             |
| -                                                                        | High Cholesterol Protocol Step #1 (low intensity, simvastatin 10mg)         |                  |             |
| -                                                                        | Percent of all individuals with high cholesterol who receive this treatment | Percent          | 85%         |
| -                                                                        | High Cholesterol Protocol Step #2 (moderate intensity, atorvastatin 20mg)   |                  |             |
| -                                                                        | Percent of all individuals with high cholesterol who receive this treatment | Percent          | 10%         |
| -                                                                        | High Cholesterol Protocol Step #3 (high intensity, atorvastatin 40mg)       |                  |             |
| -                                                                        | Percent of all individuals with high cholesterol who receive this treatment | Percent          | 5%          |
| -                                                                        | Unit price of simvastatin 10mg in LCU (Taka or BDT) and USD                 | BDT (USD)/tablet | 7 (0.082)   |
| -                                                                        | Unit price of simvastatin 20mg in LCU (Taka or BDT) and USD                 | BDT (USD)/tablet | 10 (0.118)  |
| -                                                                        | Unit price of atorvastatin 40mg in LCU (Taka or BDT) and USD                | BDT (USD)/tablet | 28 (0.330)  |

Note: \* The '5A' (Assess, Advise, Agree, Assist, Arrange) model is an evidence-based approach entailing health behavior change counselling to prevent NCD risk factors in primary care setting (Glasgow et al., 2006; Whitlock et al., 2002). LCU: Local currency unit; BDT: Bangladesh Taka.

### 3. RESULTS

#### 3.1. Population coverage

The total population in the four sub-districts was 1.12 million, of which 749,000 were adults aged 18 and above (Table 2). The total number of people eligible to receive counselling, screening, diagnosis, and treatment under the two types of HEARTS intervention packages (i.e., hypertension control and risk-based integrated approach) in the four sub-districts was determined by the primary care attendance rate, the prevalence of low-, medium-, and high- CVD risk in the population, the prevalence of hypertension, diabetes, and high cholesterol. The estimated number of eligible persons in the catchment area of the four sub-districts was 359,000, of which 305,000, 52,000, and 1,800 were projected to be low-, medium, and high- CVD risk patients. The estimated number of persons undergoing treatment for hypertension, diabetes, and high cholesterol was 75,000, 30,000, and 102,000, respectively (Table 2). Unit costs and other cost inputs were applied to these population parameters to project total program costs.

**Table 2: Population coverage: Care cascade for counselling, screening, diagnosis, and treatment**

|                                                    | <b>Golapganj</b> | <b>Fenchuganj</b> | <b>Beanibazar</b> | <b>Bishwanath</b> | <b>Total</b>   |
|----------------------------------------------------|------------------|-------------------|-------------------|-------------------|----------------|
| Total population                                   | 390,688          | 129,436           | 313,412           | 287,404           | 1,120,940      |
| Adult population in need (18+ years)               | 261,098          | 86,503            | 209,454           | 192,075           | 749,130        |
| Adults who present at the health center            | 125,066          | 41,435            | 100,328           | 92,004            | 358,833        |
| <b>Providing brief counseling</b>                  |                  |                   |                   |                   |                |
| Eligible to receive brief advice                   | 125,066          | 41,435            | 100,328           | 92,004            | 358,833        |
| <i>Tobacco user</i>                                | <i>54,654</i>    | <i>18,107</i>     | <i>43,844</i>     | <i>40,206</i>     | <i>156,810</i> |
| <i>Harmful alcohol</i>                             | <i>5,503</i>     | <i>1,823</i>      | <i>4,414</i>      | <i>4,048</i>      | <i>15,789</i>  |
| <i>Physical inactivity</i>                         | <i>15,383</i>    | <i>5,096</i>      | <i>12,340</i>     | <i>11,316</i>     | <i>44,136</i>  |
| <b>Screening and diagnosis of 10-year CVD risk</b> |                  |                   |                   |                   |                |



|                                      |         |        |        |        |         |
|--------------------------------------|---------|--------|--------|--------|---------|
| Low CVD risk                         | 106,431 | 35,261 | 85,380 | 78,295 | 305,367 |
| Medium CVD risk                      | 18,009  | 5,967  | 14,447 | 13,249 | 51,672  |
| High CVD risk                        | 625     | 207    | 502    | 460    | 1,794   |
| <b>Treatment of 10-year CVD risk</b> |         |        |        |        |         |
| Low CVD risk                         | 106,431 | 35,261 | 85,380 | 78,295 | 305,367 |
| <i>Hypertension</i>                  | 22,351  | 7,405  | 17,930 | 16,442 | 64,127  |
| <i>Diabetes</i>                      | 8,834   | 2,927  | 7,087  | 6,499  | 25,345  |
| <i>Cholesterol</i>                   | 30,226  | 10,014 | 24,248 | 22,236 | 86,724  |
| Medium CVD risk                      | 18,009  | 5,967  | 14,447 | 13,249 | 51,672  |
| <i>Hypertension</i>                  | 3,782   | 1,253  | 3,034  | 2,782  | 10,851  |
| <i>Diabetes</i>                      | 1,495   | 495    | 1,199  | 1,100  | 4,289   |
| <i>Cholesterol</i>                   | 5,115   | 1,695  | 4,103  | 3,763  | 14,675  |
| High CVD risk                        | 625     | 207    | 502    | 460    | 1,794   |
| <i>Hypertension</i>                  | 131     | 44     | 105    | 97     | 377     |
| <i>Diabetes</i>                      | 52      | 17     | 42     | 38     | 149     |
| <i>Cholesterol</i>                   | 178     | 59     | 142    | 131    | 510     |

Note: Risk factors and disease prevalence rates were assumed uniform across sub-districts.

### 3.2. Hypertension management program cost

Table 3 reports the estimated annual costs, in 2020 USD and Bangladesh Taka (BDT), of implementing the HEARTS hypertension management program in four upazilas at the population level (adults aged 18 and above). Figure 2 presents the distribution of costs by HEARTS components and sub-components. The total annual cost was estimated at USD 3.2 million, equivalent to USD 2.8 per capita, USD 4.3 per adult, and USD 8.9 per eligible participant. Module 'A' (Access to medicines and technology) constitutes the largest cost share (USD 1.36 million; 43%), followed by Module 'E' (Evidence-based treatment protocols; USD 1.22 million; 38%). The projected medication expenditure per patient treated with medications for hypertension was USD 18.

**Table 3: Total annual cost of HEARTS hypertension control program in four sub-districts**

|                                                                    | Golapganj         |                | Fenchuganj        |                | Beanibazar        |                | Bishwanath        |                | Total              |                  |
|--------------------------------------------------------------------|-------------------|----------------|-------------------|----------------|-------------------|----------------|-------------------|----------------|--------------------|------------------|
|                                                                    | BDT               | USD            | BDT               | USD            | BDT               | USD            | BDT               | USD            | BDT                | USD              |
| <b>H: Healthy Lifestyles</b>                                       | <b>13,335,339</b> | <b>157,071</b> | <b>4,765,107</b>  | <b>56,126</b>  | <b>10,800,324</b> | <b>127,212</b> | <b>9,947,252</b>  | <b>117,164</b> | <b>38,848,022</b>  | <b>457,574</b>   |
| <b>H1: Training costs</b>                                          | <b>418,990</b>    | <b>4,935</b>   | <b>418,990</b>    | <b>4,935</b>   | <b>418,990</b>    | <b>4,935</b>   | <b>418,990</b>    | <b>4,935</b>   | <b>1,675,960</b>   | <b>19,740</b>    |
| H1.1: Facility rental (% of H1)                                    | 18,000            | 212            | 18,000            | 212            | 18,000            | 212            | 18,000            | 212            | 72,000             | 848              |
| H1.2: Human resources                                              | 20,000            | 236            | 20,000            | 236            | 20,000            | 236            | 20,000            | 236            | 80,000             | 942              |
| H1.3: Instructive handbooks                                        | 35,000            | 412            | 35,000            | 412            | 35,000            | 412            | 35,000            | 412            | 140,000            | 1649             |
| H1.4: Per diem/transportation                                      | 339,990           | 4,005          | 339,990           | 4,005          | 339,990           | 4,005          | 339,990           | 4,005          | 1,359,960          | 16,018           |
| H1.5: Refreshments                                                 | 6,000             | 71             | 6,000             | 71             | 6,000             | 71             | 6,000             | 71             | 24,000             | 283              |
| <b>H2: Brief counselling costs</b>                                 | <b>12,816,349</b> | <b>150,958</b> | <b>4,246,117</b>  | <b>50,013</b>  | <b>10,281,334</b> | <b>121,099</b> | <b>9,428,262</b>  | <b>111,051</b> | <b>36,772,062</b>  | <b>433,122</b>   |
| H2.1: Tobacco                                                      | 9,272,756         | 109,220        | 3,072,108         | 36,185         | 7,438,647         | 87,617         | 6,821,441         | 80,347         | 26,604,952         | 313,368          |
| <i>Provider time to administer 5A's</i>                            | <i>3,807,374</i>  | <i>44,845</i>  | <i>1,261,401</i>  | <i>14,857</i>  | <i>3,054,293</i>  | <i>35,975</i>  | <i>2,800,870</i>  | <i>32,990</i>  | <i>10,923,938</i>  | <i>128,668</i>   |
| <i>Informational materials (print)</i>                             | <i>5,465,382</i>  | <i>64,374</i>  | <i>1,810,707</i>  | <i>21,328</i>  | <i>4,384,354</i>  | <i>51,641</i>  | <i>4,020,572</i>  | <i>47,357</i>  | <i>15,681,014</i>  | <i>184,700</i>   |
| H2.2: Alcohol                                                      | 933,641           | 10,997         | 309,320           | 3,643          | 748,971           | 8,822          | 686,827           | 8,090          | 2,678,759          | 31,552           |
| <i>Provider time to administer 5A's</i>                            | <i>383,351</i>    | <i>4,515</i>   | <i>127,006</i>    | <i>1,496</i>   | <i>307,526</i>    | <i>3,622</i>   | <i>282,010</i>    | <i>3,322</i>   | <i>1,099,893</i>   | <i>12,955</i>    |
| <i>Informational materials (print)</i>                             | <i>550,290</i>    | <i>6,482</i>   | <i>182,314</i>    | <i>2,147</i>   | <i>441,445</i>    | <i>5,200</i>   | <i>404,817</i>    | <i>4,768</i>   | <i>1,578,866</i>   | <i>18,597</i>    |
| H2.3: Physical inactivity                                          | 2,609,952         | 30,741         | 864,689           | 10,185         | 2,093,715         | 24,661         | 1,919,994         | 22,615         | 7,488,350          | 88,202           |
| <i>Provider time to administer 5A's</i>                            | <i>1,071,641</i>  | <i>12,622</i>  | <i>355,040</i>    | <i>4,182</i>   | <i>859,675</i>    | <i>10,126</i>  | <i>788,345</i>    | <i>9,286</i>   | <i>3,074,701</i>   | <i>36,216</i>    |
| <i>Informational materials (print)</i>                             | <i>1,538,311</i>  | <i>18,119</i>  | <i>509,650</i>    | <i>6,003</i>   | <i>1,234,040</i>  | <i>14,535</i>  | <i>1,131,648</i>  | <i>13,329</i>  | <i>4,413,649</i>   | <i>51,986</i>    |
| <b>H3: Other program costs</b>                                     | <b>100,000</b>    | <b>1,178</b>   | <b>100,000</b>    | <b>1,178</b>   | <b>100,000</b>    | <b>1,178</b>   | <b>100,000</b>    | <b>1,178</b>   | <b>400,000</b>     | <b>4,711</b>     |
| <i>Community awareness meetings</i>                                | <i>50,000</i>     | <i>589</i>     | <i>50,000</i>     | <i>589</i>     | <i>50,000</i>     | <i>589</i>     | <i>50,000</i>     | <i>589</i>     | <i>200,000</i>     | <i>2,356</i>     |
| <i>Community health workers training</i>                           | <i>50,000</i>     | <i>589</i>     | <i>50,000</i>     | <i>589</i>     | <i>50,000</i>     | <i>589</i>     | <i>50,000</i>     | <i>589</i>     | <i>200,000</i>     | <i>2,356</i>     |
| <b>E: Evidence-based Treatment Protocols</b>                       | <b>35,959,415</b> | <b>423,550</b> | <b>11,913,524</b> | <b>140,324</b> | <b>28,846,806</b> | <b>339,774</b> | <b>26,453,304</b> | <b>311,582</b> | <b>103,173,049</b> | <b>1,215,230</b> |
| E1: Ask about patient history - provider time                      | 5,317,334         | 62,631         | 1,761,658         | 20,750         | 4,265,589         | 50,243         | 3,911,661         | 46,074         | 15,256,241         | 179,697          |
| E2: Assess via physical exam and diagnostic tests - provider time  | 5,317,334         | 62,631         | 1,761,658         | 20,750         | 4,265,589         | 50,243         | 3,911,661         | 46,074         | 15,256,241         | 179,697          |
| E3: Return visits - Counsel and treat per protocol - provider time | 25,324,748        | 298,289        | 8,390,209         | 98,825         | 20,315,628        | 239,289        | 18,629,982        | 219,434        | 72,660,567         | 855,837          |
| <b>A: Access to Essential Medicines and Technologies</b>           | <b>40,197,017</b> | <b>473,463</b> | <b>13,429,971</b> | <b>158,186</b> | <b>32,279,509</b> | <b>380,206</b> | <b>29,615,146</b> | <b>348,824</b> | <b>115,521,643</b> | <b>1,360,679</b> |
| <b>A1: Hypertension medications</b>                                | <b>40,028,765</b> | <b>471,481</b> | <b>13,261,719</b> | <b>156,204</b> | <b>32,111,257</b> | <b>378,224</b> | <b>29,446,893</b> | <b>346,842</b> | <b>114,848,633</b> | <b>1,352,752</b> |
| <i>Amlodipine 5mg</i>                                              | <i>9,873,894</i>  | <i>116,300</i> | <i>3,271,268</i>  | <i>38,531</i>  | <i>7,920,882</i>  | <i>93,297</i>  | <i>7,263,664</i>  | <i>85,556</i>  | <i>28,329,707</i>  | <i>333,683</i>   |
| <i>Losartan 50mg</i>                                               | <i>30,016,637</i> | <i>353,553</i> | <i>9,944,653</i>  | <i>117,134</i> | <i>24,079,482</i> | <i>283,622</i> | <i>22,081,538</i> | <i>260,089</i> | <i>86,122,310</i>  | <i>1,014,397</i> |
| <i>Hydrochlorothiazide 12.5mg</i>                                  | <i>138,235</i>    | <i>1,628</i>   | <i>45,798</i>     | <i>539</i>     | <i>110,892</i>    | <i>1,306</i>   | <i>101,691</i>    | <i>1,198</i>   | <i>396,616</i>     | <i>4,672</i>     |



|                                                                                                              | Golapganj         |                  | Fenchuganj        |                | Beanibazar        |                | Bishwanath        |                | Total              |                  |
|--------------------------------------------------------------------------------------------------------------|-------------------|------------------|-------------------|----------------|-------------------|----------------|-------------------|----------------|--------------------|------------------|
|                                                                                                              | BDT               | USD              | BDT               | USD            | BDT               | USD            | BDT               | USD            | BDT                | USD              |
| <b>A2: Diagnostic technologies, machines, and supplies</b>                                                   | 40,028,765        | 471,481          | 13,261,719        | 156,204        | 32,111,257        | 378,224        | 29,446,893        | 346,842        | 114,848,633        | 1,352,752        |
| <b>R: Risk-based Management</b>                                                                              | <b>172,334</b>    | <b>2,030</b>     | <b>172,334</b>    | <b>2,030</b>   | <b>172,334</b>    | <b>2,030</b>   | <b>172,334</b>    | <b>2,030</b>   | <b>689,336</b>     | <b>8,119</b>     |
| <b>R1: Training costs</b>                                                                                    | 172,334           | 2,030            | 172,334           | 2,030          | 172,334           | 2,030          | 172,334           | 2,030          | 689,336            | 8,119            |
| <b>T: Team-based care Savings from training nurses and CHWs to do tasks customarily performed by doctors</b> | <b>13,815,043</b> | <b>162,721</b>   | <b>4,576,989</b>  | <b>53,910</b>  | <b>11,082,490</b> | <b>130,536</b> | <b>10,162,944</b> | <b>119,705</b> | <b>39,637,467</b>  | <b>466,872</b>   |
| <b>T1: Savings from training nurses</b>                                                                      | 11,976,134        | 141,062          | 3,967,750         | 46,734         | 9,607,309         | 113,160        | 8,810,163         | 103,771        | 34,361,355         | 404,727          |
| <i>Savings from counselling to change behavior</i>                                                           | 1,355,873         | 15,970           | 449,207           | 5,291          | 1,087,688         | 12,811         | 997,439           | 11,748         | 3,890,208          | 45,821           |
| <i>Savings from screening for--and assess--CVD risk</i>                                                      | 3,367,235         | 39,661           | 1,115,581         | 13,140         | 2,701,212         | 31,816         | 2,477,084         | 29,176         | 9,661,112          | 113,794          |
| <i>Savings from treating CVD risk</i>                                                                        | 7,253,025         | 85,430           | 2,402,961         | 28,303         | 5,818,410         | 68,533         | 5,335,639         | 62,846         | 20,810,036         | 245,112          |
| <b>T2: Savings from training CHWs</b>                                                                        | 1,838,909         | 21,660           | 609,239           | 7,176          | 1,475,181         | 17,376         | 1,352,781         | 15,934         | 5,276,112          | 62,145           |
| <i>Savings from counselling to change behavior</i>                                                           | 1,838,909         | 21,660           | 609,239           | 7,176          | 1,475,181         | 17,376         | 1,352,781         | 15,934         | 5,276,112          | 62,145           |
| <b>S: Systems for monitoring</b>                                                                             | <b>3,114,636</b>  | <b>36,686</b>    | <b>3,114,636</b>  | <b>36,686</b>  | <b>3,114,636</b>  | <b>36,686</b>  | <b>3,114,636</b>  | <b>36,686</b>  | <b>12,458,546</b>  | <b>146,744</b>   |
| <b>S1: Human resources</b>                                                                                   | <b>2,969,636</b>  | <b>34,978</b>    | <b>2,969,636</b>  | <b>34,978</b>  | <b>2,969,636</b>  | <b>34,978</b>  | <b>2,969,636</b>  | <b>34,978</b>  | <b>11,878,546</b>  | <b>139,912</b>   |
| <b>S2: Technology</b>                                                                                        | <b>110,000</b>    | <b>1,296</b>     | <b>110,000</b>    | <b>1,296</b>   | <b>110,000</b>    | <b>1,296</b>   | <b>110,000</b>    | <b>1,296</b>   | <b>440,000</b>     | <b>5,183</b>     |
| <b>S3: Supplies</b>                                                                                          | <b>10,000</b>     | <b>118</b>       | <b>10,000</b>     | <b>118</b>     | <b>10,000</b>     | <b>118</b>     | <b>10,000</b>     | <b>118</b>     | <b>40,000</b>      | <b>471</b>       |
| <b>S4: Training</b>                                                                                          | <b>25,000</b>     | <b>294</b>       | <b>25,000</b>     | <b>294</b>     | <b>25,000</b>     | <b>294</b>     | <b>25,000</b>     | <b>294</b>     | <b>100,000</b>     | <b>1,178</b>     |
| <b>Total Program Cost (H+E+A+R+T+S)</b>                                                                      | <b>92,778,742</b> | <b>1,092,800</b> | <b>33,395,573</b> | <b>393,352</b> | <b>75,213,609</b> | <b>885,908</b> | <b>69,302,672</b> | <b>816,286</b> | <b>270,690,596</b> | <b>3,188,346</b> |

[Insert Figure 2 here]

**Figure 2: Distribution of annual cost by HEARTS components**

Most of the projected annual cost (95%) of implementing Module ‘H’ (Healthy-lifestyles counselling) was attributable to the cost of provider time and information materials for counselling patients (USD 433,000). The estimated cost for Module ‘E’ (Evidence-based treatment protocols) was attributable to provider time across three major activities: asking patient history (USD 180,000; 15%), patient assessment via physical exam and diagnostic tests (USD 180,000; 15%), and conducting return visits (USD 856,000, 70%). The projected cost to implement Module ‘S’ (Systems for monitoring) was USD 147,000, primarily attributed to administration staff labor costs (95%), with the remaining cost allocated to technology (software/hardware).

Table 4 highlights an important programmatic aspect by describing health providers’ time needed to implement the hypertension control program. Implementing the program at the full population level in all four sub-districts was estimated to require the full time equivalent of 51 doctors, 51 nurses, and 6 community health workers. The largest time requirement activities included providing initial screening and diagnosis and conducting return visits.

**Table 4: Hypertension control program: estimated health provider time for counselling, screening, diagnosis, and treatment**

| Activity                                              | Golapganj           |      | Fenchugonj        |     | Beanibazar          |     | Bishwanath          |     | Total       |
|-------------------------------------------------------|---------------------|------|-------------------|-----|---------------------|-----|---------------------|-----|-------------|
|                                                       | Workdays            | FTE  | Workdays          | FTE | Workdays            | FTE | Workdays            | FTE | FTE         |
| <b>Counselling to change behavior</b>                 |                     |      |                   |     |                     |     |                     |     |             |
| Doctor                                                | 524 days, 7 hours   | 2.0  | 173 days, 6 hours | 0.7 | 420 days, 2 hours   | 1.6 | 385 days, 2 hours   | 1.5 | <b>5.8</b>  |
| Nurses                                                | 524 days, 7 hours   | 2.0  | 173 days, 6 hours | 0.7 | 420 days, 2 hours   | 1.6 | 385 days, 2 hours   | 1.5 | <b>5.8</b>  |
| CHW                                                   | 524 days, 7 hours   | 2.0  | 173 days, 6 hours | 0.7 | 420 days, 2 hours   | 1.6 | 385 days, 2 hours   | 1.5 | <b>5.8</b>  |
| <b>Screening and diagnosis</b>                        |                     |      |                   |     |                     |     |                     |     |             |
| Doctor                                                | 1,302 days, 1 hours | 5.0  | 431 days, 6 hours | 1.7 | 1,045 days, 2 hours | 4.0 | 958 days, 3 hours   | 3.7 | <b>14.4</b> |
| Nurses                                                | 1,302 days, 1 hours | 5.0  | 431 days, 6 hours | 1.7 | 1,045 days, 2 hours | 4.0 | 958 days, 3 hours   | 3.7 | <b>14.4</b> |
| <b>Return visits - Counsel and treat per protocol</b> |                     |      |                   |     |                     |     |                     |     |             |
| Doctor                                                | 2,806 days, 0 hours | 10.8 | 929 days, 6 hours | 3.6 | 2,251 days, 1 hours | 8.7 | 2,064 days, 2 hours | 7.9 | 31.0        |
| Nurses                                                | 2,806 days, 0 hours | 10.8 | 929 days, 6 hours | 3.6 | 2,251 days, 1 hours | 8.7 | 2,064 days, 2 hours | 7.9 | 31.0        |

Note: FTE: Full-time equivalent (annual: total minutes/124800).

### 3.3. Risk-based integrated hypertension, diabetes, and high cholesterol management program cost

Table 5 reports the estimated costs of implementing the risk-based hypertension, diabetes, and high cholesterol management program in four upazilas at the population level (adults aged 18 and above). Figure 2 presents the distribution of costs by HEARTS components. The total annual cost was estimated at USD 14.4 million, equivalent to USD 12.9 per capita, USD 19.3 per adult, and USD 40.2 per eligible participant. Module 'A' (Access to medicines and technology) constitutes the largest cost share (USD 11.7 million; 81%), followed by Module 'E' (Evidence-based treatment protocols, USD 1.9 million; 13%). Within Module 'A', the projected costs of diagnostic tests, hypertension medications, diabetes medications, and cholesterol medications were USD 5.7 million (49% of module costs), USD 1.4 million (12%), USD 0.9 million (7%), and USD 3.8 million (32%), respectively. The projected medication expenditure per patient treated with medications for hypertension, diabetes, and cholesterol was USD 18, USD 29, and USD 37, respectively.

Table 5: Annual cost of implementing risk-based hypertension, diabetes, and high cholesterol management program in four sub-districts

|                                                                           | Golapganj          |                  | Fenchuganj         |                  | Beanibazar         |                  | Bishwanath         |                  | Total              |                   |
|---------------------------------------------------------------------------|--------------------|------------------|--------------------|------------------|--------------------|------------------|--------------------|------------------|--------------------|-------------------|
|                                                                           | BDT                | USD               |
| <b>H: Healthy Lifestyles Counselling</b>                                  | <b>13,335,339</b>  | <b>121,116</b>   | <b>4,765,107</b>   | <b>56,126</b>    | <b>10,800,324</b>  | <b>127,212</b>   | <b>9,947,252</b>   | <b>117,164</b>   | <b>38,848,022</b>  | <b>457,574</b>    |
| <b>H1: Training costs</b>                                                 | <b>418,990</b>     | <b>4,287</b>     | <b>418,990</b>     | <b>4,935</b>     | <b>418,990</b>     | <b>4,935</b>     | <b>418,990</b>     | <b>4,935</b>     | 1,675,960          | 19,740            |
| H1.1: Facility rental (% of H1)                                           | 18,000             | 212              | 18,000             | 212              | 18,000             | 212              | 18,000             | 212              | 72,000             | 848               |
| H1.2: Human resources                                                     | 20,000             | 236              | 20,000             | 236              | 20,000             | 236              | 20,000             | 236              | 80,000             | 942               |
| H1.3: Instructive handbooks                                               | 35,000             | 353              | 35,000             | 412              | 35,000             | 412              | 35,000             | 412              | 140,000            | 1,649             |
| H1.4: Per diem/transportation                                             | 339,990            | 3,416            | 339,990            | 4,005            | 339,990            | 4,005            | 339,990            | 4,005            | 1,359,960          | 16,018            |
| H1.5: Refreshments                                                        | 6,000              | 71               | 6,000              | 71               | 6,000              | 71               | 6,000              | 71               | 24,000             | 283               |
| <b>H2: Brief counselling costs</b>                                        | <b>12,816,349</b>  | <b>115,651</b>   | <b>4,246,117</b>   | <b>50,013</b>    | <b>10,281,334</b>  | <b>121,099</b>   | <b>9,428,262</b>   | <b>111,051</b>   | <b>36,772,062</b>  | <b>433,122</b>    |
| H2.1: Tobacco                                                             | 9,272,756          | 83,675           | 3,072,108          | 36,185           | 7,438,647          | 87,617           | 6,821,441          | 80,347           | 26,604,952         | 313,368           |
| <i>Provider time to administer 5A's</i>                                   | <i>3,807,374</i>   | <i>30,030</i>    | <i>1,261,401</i>   | <i>14,857</i>    | <i>3,054,293</i>   | <i>35,975</i>    | <i>2,800,870</i>   | <i>32,990</i>    | <i>10,923,938</i>  | <i>128,668</i>    |
| <i>Informational materials (print)</i>                                    | <i>5,465,382</i>   | <i>53,645</i>    | <i>1,810,707</i>   | <i>21,328</i>    | <i>4,384,354</i>   | <i>51,641</i>    | <i>4,020,572</i>   | <i>47,357</i>    | <i>1,5681,014</i>  | <i>184,700</i>    |
| H2.2: Alcohol                                                             | 933,641            | 8,425            | 309,320            | 3,643            | 748,971            | 8,822            | 686,827            | 8,090            | 2,678,759          | 31,552            |
| <i>Provider time to administer 5A's</i>                                   | <i>383,351</i>     | <i>3,024</i>     | <i>127,006</i>     | <i>1,496</i>     | <i>307,526</i>     | <i>3,622</i>     | <i>282,010</i>     | <i>3,322</i>     | <i>1,099,893</i>   | <i>12,955</i>     |
| <i>Informational materials (print)</i>                                    | <i>550,290</i>     | <i>5,401</i>     | <i>182,314</i>     | <i>2,147</i>     | <i>441,445</i>     | <i>5,200</i>     | <i>404,817</i>     | <i>4,768</i>     | <i>1,578,866</i>   | <i>18,597</i>     |
| H2.3: Physical inactivity                                                 | 2,609,952          | 23,552           | 864,689            | 10,185           | 2,093,715          | 24,661           | 1,919,994          | 22,615           | 7,488,350          | 88,202            |
| <i>Provider time to administer 5A's</i>                                   | <i>1,071,641</i>   | <i>8,452</i>     | <i>355,040</i>     | <i>4,182</i>     | <i>859,675</i>     | <i>10,126</i>    | <i>788,345</i>     | <i>9,286</i>     | <i>3,074,701</i>   | <i>36,216</i>     |
| <i>Informational materials (print)</i>                                    | <i>1,538,311</i>   | <i>15,099</i>    | <i>509,650</i>     | <i>6,003</i>     | <i>1,234,040</i>   | <i>14,535</i>    | <i>1,131,648</i>   | <i>13,329</i>    | <i>4,413,649</i>   | <i>51,986</i>     |
| <b>H3: Other program costs</b>                                            | <b>100,000</b>     | <b>1,178</b>     | <b>100,000</b>     | <b>1,178</b>     | <b>100,000</b>     | <b>1,178</b>     | <b>100,000</b>     | <b>1,178</b>     | <b>400,000</b>     | <b>4,711</b>      |
| <i>Community awareness meetings</i>                                       | <i>50,000</i>      | <i>589</i>       | <i>50,000</i>      | <i>589</i>       | <i>50,000</i>      | <i>589</i>       | <i>50,000</i>      | <i>589</i>       | <i>200,000</i>     | <i>2,356</i>      |
| <i>Community health workers training</i>                                  | <i>50,000</i>      | <i>589</i>       | <i>50,000</i>      | <i>589</i>       | <i>50,000</i>      | <i>589</i>       | <i>50,000</i>      | <i>589</i>       | <i>200,000</i>     | <i>2,356</i>      |
| <b>E: Evidence-based Treatment Protocols</b>                              | <b>56,155,264</b>  | <b>661,428</b>   | <b>18,604,504</b>  | <b>219,134</b>   | <b>45,048,007</b>  | <b>530,601</b>   | <b>41,310,245</b>  | <b>486,575</b>   | <b>161,118,020</b> | <b>1,897,739</b>  |
| <b>E1: Ask about patient history - provider time</b>                      | 5,317,334          | 62,631           | 1,761,658          | 20,750           | 4,265,589          | 50,243           | 3,911,661          | 46,074           | 15,256,241         | 179,697           |
| <b>E2: Assess via physical exam and diagnostic tests - provider time</b>  | 25,513,182         | 300,509          | 8,452,638          | 99,560           | 20,466,790         | 241,069          | 18,768,602         | 221,067          | 73,201,212         | 862,205           |
| <b>E3: Return visits - Counsel and treat per protocol - provider time</b> | 25,324,748         | 298,289          | 8,390,209          | 98,825           | 20,315,628         | 239,289          | 18,629,982         | 219,434          | 72,660,567         | 855,837           |
| <b>A: Access to Essential Medicines and tech.</b>                         | <b>347,102,943</b> | <b>4,088,374</b> | <b>115,109,353</b> | <b>1,355,823</b> | <b>278,480,835</b> | <b>3,280,104</b> | <b>255,388,440</b> | <b>3,008,109</b> | <b>996,081,571</b> | <b>11,732,410</b> |
| <b>A1: Diagnostic tests</b>                                               | 170,039,655        | 2,002,823        | 56,334,940         | 663,545          | 136,406,582        | 1,606,674        | 125,088,536        | 1,473,363        | 487,869,714        | 5,746,404         |
| <i>Complete blood count (panel)</i>                                       | <i>51,527,168</i>  | <i>606,916</i>   | <i>17,071,194</i>  | <i>201,074</i>   | <i>41,335,328</i>  | <i>486,871</i>   | <i>37,905,617</i>  | <i>446,474</i>   | <i>147,839,307</i> | <i>1,741,335</i>  |
| <i>Blood lipid panel</i>                                                  | <i>103,054,336</i> | <i>1,213,832</i> | <i>34,142,388</i>  | <i>402,148</i>   | <i>82,670,656</i>  | <i>973,742</i>   | <i>75,811,234</i>  | <i>892,947</i>   | <i>295,678,614</i> | <i>3,482,669</i>  |
| <i>Fasting blood glucose (FPG)</i>                                        | <i>15,458,150</i>  | <i>182,075</i>   | <i>5,121,358</i>   | <i>60,322</i>    | <i>12,400,598</i>  | <i>146,061</i>   | <i>11,371,685</i>  | <i>133,942</i>   | <i>44,351,792</i>  | <i>522,400</i>    |

|                                                                                                               | Golapganj          |                  | Fenchuganj         |                  | Beanibazar         |                  | Bishwanath         |                  | Total                |                   |
|---------------------------------------------------------------------------------------------------------------|--------------------|------------------|--------------------|------------------|--------------------|------------------|--------------------|------------------|----------------------|-------------------|
|                                                                                                               | BDT                | USD              | BDT                | USD              | BDT                | USD              | BDT                | USD              | BDT                  | USD               |
| <b>A2: Hypertension medications</b>                                                                           | 40,028,765         | 471,481          | 13,261,719         | 156,204          | 32,111,257         | 378,224          | 29,446,893         | 346,842          | 114,848,633          | 1,352,752         |
| <i>Amlodipine 5mg</i>                                                                                         | 9,873,894          | 116,300          | 3,271,268          | 38,531           | 7,920,882          | 93,297           | 7,263,664          | 85,556           | 28,329,707           | 333,683           |
| <i>Losartan 50mg</i>                                                                                          | 30,016,637         | 353,553          | 9,944,653          | 117,134          | 24,079,482         | 283,622          | 22,081,538         | 260,089          | 86,122,310           | 1,014,397         |
| <i>Hydrochlorothiazide 12.5mg</i>                                                                             | 138,235            | 1,628            | 45,798             | 539              | 110,892            | 1,306            | 101,691            | 1,198            | 396,616              | 4,672             |
| <b>A3: Diabetes medications</b>                                                                               | 25,366,503         | 298,781          | 8,404,042          | 98,988           | 20,349,124         | 239,683          | 18,660,698         | 219,796          | 72,780,367           | 857,248           |
| <i>Metformin 500mg</i>                                                                                        | 11,707,617         | 137,899          | 3,878,789          | 45,687           | 9,391,903          | 110,623          | 8,612,630          | 101,444          | 33,590,939           | 395,653           |
| <i>Metformin 1000mg</i>                                                                                       | 12,292,998         | 144,794          | 4,072,728          | 47,971           | 9,861,498          | 116,154          | 9,043,262          | 106,517          | 35,270,486           | 415,436           |
| <i>Gliclazide</i>                                                                                             | 1,365,889          | 16,088           | 452,525            | 5,330            | 1,095,722          | 12,906           | 1,004,807          | 11,835           | 3,918,943            | 46,160            |
| <b>A4: Cholesterol medications</b>                                                                            | 111,499,768        | 1,313,307        | 36,940,399         | 435,105          | 89,445,620         | 1,053,541        | 82,024,060         | 966,126          | 319,909,847          | 3,768,078         |
| <i>Simvastatin 10mg</i>                                                                                       | 79,451,930         | 935,830          | 26,322,800         | 310,045          | 63,736,699         | 750,727          | 58,448,282         | 688,437          | 227,959,711          | 2,685,038         |
| <i>Atorvastatin 20mg</i>                                                                                      | 13,353,266         | 157,282          | 4,424,000          | 52,108           | 10,712,050         | 126,173          | 9,823,241          | 115,704          | 38,312,556           | 451,267           |
| <i>Atorvastatin 40mg</i>                                                                                      | 18,694,572         | 220,195          | 6,193,600          | 72,952           | 14,996,870         | 176,642          | 13,752,537         | 161,985          | 53,637,579           | 631,774           |
| <b>A5: Diagnostic tech. machines, and supplies</b>                                                            | 168,253            | 1,982            | 168,253            | 1,982            | 168,253            | 1,982            | 168,253            | 1,982            | 673,010              | 7,927             |
| <b>R: Risk-based Management</b>                                                                               | 5,489,668          | 64,660           | 1,933,992          | 22,780           | 4,437,923          | 52,272           | 4,083,995          | 48,104           | 15,945,577           | 187,816           |
| <b>R1: Training costs</b>                                                                                     | 172,334            | 2,030            | 172,334            | 2,030            | 172,334            | 2,030            | 172,334            | 2,030            | 689,336              | 8,119             |
| <b>R2: Estimate risk using risk charts</b>                                                                    | 5,317,334          | 62,631           | 1,761,658          | 20,750           | 4,265,589          | 50,243           | 3,911,661          | 46,074           | 15,256,241           | 179,697           |
| <b>T: Team-based care: Savings from training nurses and CHWs to do tasks customarily performed by doctors</b> | <b>25,600,367</b>  | <b>301,536</b>   | <b>8,481,523</b>   | <b>99,900</b>    | <b>20,536,731</b>  | <b>241,893</b>   | <b>18,832,739</b>  | <b>221,823</b>   | <b>73,451,360</b>    | <b>865,151</b>    |
| <b>T1: Savings from training nurses</b>                                                                       | 23,761,458         | 279,876          | 7,872,283          | 92,724           | 19,061,549         | 224,518          | 17,479,958         | 205,889          | 68,175,248           | 803,006           |
| <i>Savings from counselling to change behavior</i>                                                            | 1,355,873          | 15,970           | 449,207            | 5,291            | 1,087,688          | 12,811           | 997,439            | 11,748           | 3,890,208            | 45,821            |
| <i>Savings from screening for--and assess--CVD risk</i>                                                       | 15,152,559         | 178,475          | 5,020,114          | 59,130           | 12,155,452         | 143,174          | 11,146,879         | 131,294          | 43,475,005           | 512,073           |
| <i>Savings from treating CVD risk</i>                                                                         | 7,253,025          | 85,430           | 2,402,961          | 28,303           | 5,818,410          | 68,533           | 5,335,639          | 62,846           | 20,810,036           | 245,112           |
| <b>T2: Savings from training CHWs</b>                                                                         | 1,838,909          | 21,660           | 609,239            | 7,176            | 1,475,181          | 17,376           | 1,352,781          | 15,934           | 5,276,112            | 62,145            |
| <i>Savings from counselling to change behavior</i>                                                            | 1,838,909          | 21,660           | 609,239            | 7,176            | 1,475,181          | 17,376           | 1,352,781          | 15,934           | 5,276,112            | 62,145            |
| <b>S: Systems for monitoring</b>                                                                              | <b>3,114,636</b>   | <b>36,686</b>    | <b>3,114,636</b>   | <b>36,686</b>    | <b>3,114,636</b>   | <b>36,686</b>    | <b>3,114,636</b>   | <b>36,686</b>    | <b>12,458,546</b>    | <b>146,744</b>    |
| <b>S1: Human resources</b>                                                                                    | 2,969,636          | 34,978           | 2,969,636          | 34,978           | 2,969,636          | 34,978           | 2,969,636          | 34,978           | 11,878,546           | 139,912           |
| <b>S2: Technology</b>                                                                                         | 110,000            | 1,296            | 110,000            | 1,296            | 110,000            | 1,296            | 110,000            | 1,296            | 440,000              | 5,183             |
| <b>S3: Supplies</b>                                                                                           | 10,000             | 118              | 10,000             | 118              | 10,000             | 118              | 10,000             | 118              | 40,000               | 471               |
| <b>S4: Training</b>                                                                                           | 25,000             | 294              | 25,000             | 294              | 25,000             | 294              | 25,000             | 294              | 100,000              | 1,178             |
| <b>Total Program Cost (H+E+A+R+T+S)</b>                                                                       | <b>425,197,850</b> | <b>5,008,220</b> | <b>143,527,592</b> | <b>1,690,549</b> | <b>341,881,725</b> | <b>4,026,875</b> | <b>313,844,568</b> | <b>3,696,638</b> | <b>1,224,451,735</b> | <b>14,422,282</b> |

1  
2  
3 The adoption of task-sharing approach would save USD 865,000, of which USD 803,000 comes  
4 from using nurses to complete tasks customarily performed by doctors (i.e., counselling, screening, and  
5 assessing CVD risk, and treating according to CVD risk) and USD 62,000 comes from using CHWs to  
6 provide counselling to change behavior. Implementing the risk-based hypertension, diabetes, and high  
7 cholesterol management program at the full population level in all four sub-districts was estimated to  
8 require the full time equivalent of 58 doctors, 58 nurses, 6 CHWs, and 101 lab technicians (Table 6). The  
9 largest time requirement activities included providing initial screening and diagnosis and conducting  
10 return visits.  
11  
12  
13  
14  
15  
16  
17  
18  
19  
20  
21  
22  
23  
24  
25  
26  
27  
28  
29  
30  
31  
32  
33  
34  
35  
36  
37  
38  
39  
40  
41  
42  
43  
44  
45  
46  
47  
48  
49  
50  
51  
52  
53  
54  
55  
56  
57  
58  
59  
60

1  
2  
3  
4  
5  
6  
7  
8  
9  
10  
11  
12  
13  
14  
15  
16  
17  
18  
19  
20  
21  
22  
23  
24  
25  
26  
27  
28  
29  
30  
31  
32  
33  
34  
35  
36  
37  
38  
39  
40  
41  
42  
43  
44  
45  
46  
47

**Table 6: Integrated risk-based approach: estimated health provider time for counselling, screening, diagnosis, and treatment**

| Activity                                              | Golapganj           |      | Fenchugonj          |      | Beanibazar          |      | Bishwanath          |      | Total        |
|-------------------------------------------------------|---------------------|------|---------------------|------|---------------------|------|---------------------|------|--------------|
|                                                       | Workdays            | FTE  | Workdays            | FTE  | Workdays            | FTE  | Workdays            | FTE  | FTE          |
| <b>Counselling to change behavior</b>                 |                     |      |                     |      |                     |      |                     |      |              |
| Doctor                                                | 524 days, 7 hours   | 2.0  | 173 days, 6 hours   | 0.7  | 420 days, 2 hours   | 1.6  | 385 days, 2 hours   | 1.5  | <b>5.8</b>   |
| Nurses                                                | 524 days, 7 hours   | 2.0  | 173 days, 6 hours   | 0.7  | 420 days, 2 hours   | 1.6  | 385 days, 2 hours   | 1.5  | <b>5.8</b>   |
| CHW                                                   | 524 days, 7 hours   | 2.0  | 173 days, 6 hours   | 0.7  | 420 days, 2 hours   | 1.6  | 385 days, 2 hours   | 1.5  | <b>5.8</b>   |
| <b>Screening and diagnosis</b>                        |                     |      |                     |      |                     |      |                     |      |              |
| Doctor                                                | 1,302 days, 1 hours | 5.0  | 431 days, 6 hours   | 1.7  | 1,045 days, 2 hours | 4.0  | 958 days, 3 hours   | 3.7  | <b>14.4</b>  |
| Nurses                                                | 1,302 days, 1 hours | 5.0  | 431 days, 6 hours   | 1.7  | 1,045 days, 2 hours | 4.0  | 958 days, 3 hours   | 3.7  | <b>14.4</b>  |
| <b>Screening and diagnosis by Lab technicians</b>     | 9,119 days, 3 hours | 35.1 | 3,021 days, 6 hours | 11.6 | 7,315 days, 0 hours | 28.1 | 6,708 days, 1 hours | 25.8 | <b>100.6</b> |
| <b>Estimating CVD risk using risk charts</b>          |                     |      |                     |      |                     |      |                     |      |              |
| Doctor                                                | 2,658,667           | 2.5  | 880,829             | 0.8  | 2,132,795           | 2.0  | 1,955,830           | 1.8  | <b>7.2</b>   |
| Nurses                                                | 2,658,667           | 2.5  | 880,829             | 0.8  | 2,132,795           | 2.0  | 1,955,830           | 1.8  | <b>7.2</b>   |
| <b>Return visits - Counsel and treat per protocol</b> |                     |      |                     |      |                     |      |                     |      |              |
| Doctor                                                | 2,806 days, 0 hours | 10.8 | 929 days, 6 hours   | 3.6  | 2,251 days, 1 hours | 8.7  | 2,064 days, 2 hours | 7.9  | 31.0         |
| Nurses                                                | 2,806 days, 0 hours | 10.8 | 929 days, 6 hours   | 3.6  | 2,251 days, 1 hours | 8.7  | 2,064 days, 2 hours | 7.9  | 31.0         |



#### 4. Discussion

The HEARTS pilot project in four Bangladesh sub-districts launched a framework for hypertension management in primary care, with a potential for expanding into a comprehensive CVD prevention approach that incorporates hypertension, diabetes, and cholesterol management. This study projects the expected cost of scaling up the program to all eligible adults in the participating sub-districts. We assessed two program scenarios: a hypertension management program and an integrated risk-based hypertension, diabetes, and cholesterol management program. The total annual cost was estimated at USD 3.2 and 14.4 million USD for the hypertension and risk-based comprehensive approach, respectively. The overall per capita cost was approximately USD 2.8 per capita for the hypertension control program and USD 12.9 per capita for the risk-based comprehensive approach. These estimates correspond to 0.14% and 0.7% of the 2020 gross domestic product per capita in Bangladesh, respectively. The main cost drivers for the hypertension control program were medication expenditures (43%) and the cost of provider time for providing care during multiple visits (38%). In the risk-based integrated approach, the combined costs of hypertension, diabetes, and cholesterol medications and diagnostic tests make up the largest share of the overall program cost (81%). Although the main driver of projected program costs for the integrated approach was expenditure on essential medicines and diagnostic tests, hypertension and diabetes medications contributed a relatively small portion (19%) to this expenditure (i.e., Module A), whereas cholesterol medications contributed nearly 32%. Hypertension treatment remains among the leading cost-effective ways to combat heart disease. In this study, the annual medication expenditure per patient treated with medications for hypertension, diabetes, and cholesterol was USD 18, USD 29, and USD 37, respectively.

Though based on observations gathered in one district of Bangladesh, our results are consistent with those reported by past studies. A previous study on Bangladesh by Nugent et al. (2017) estimated that hypertension treatment would cost about USD 13 (BDT 1,070) per patient per year.[31] WHO (2011) has estimated the average hypertension screening cost for LMICs at approximately USD 4 for LMICs, not including treatment but including the cost of performing CVD risk assessment and BP measurement in primary care settings.[32] Haque (2016) estimated the average cost of diabetes screening in Bangladesh at approximately USD 5 (BDT 411), including glucose screening in primary care, documentation, setting up referrals, and organizing screening events but excluding treatment.[33] In this study, the cost elements in the Bangladesh HEARTS program are wide-ranging including screening, diagnosis, and treatment for multiple CVD risk conditions (hypertension, diabetes, hyperlipidemia) and counseling for CVD risk factors (tobacco use, alcohol use, and physical inactivity).

1  
2  
3 The analysis revealed that scaling up the hypertension management program within the four sub-  
4 districts would require an additional full-time equivalent of 51 doctors, 51 nurses, and 6 CHWs.  
5  
6 Population-level scale-up of the risk-based hypertension, diabetes, and high cholesterol management  
7 program in the four sub-districts was estimated to require the full time equivalent of 58 doctors, 58 nurses,  
8 6 CHWs, and 101 lab technicians. To put this in context, a typical 50-bed sub-district public health  
9 complex in Bangladesh employs 20 doctors, 16 nurses, and one medical assistant. Oftentimes, not all  
10 health provider posts are filled. This gap in provider capacity poses a significant barrier to program  
11 expansion. Team-based care using task-sharing among doctors, nurses and community health workers and  
12 volunteers can accomplish the activities required by the HEARTS package more affordably, including  
13 NCD-related health promotion, prevention, screening, and patient navigation through the health system. A  
14 systematic review of intervention trials in low- and middle-income countries by Joshi et al. (2014) found  
15 that team-based care, including task sharing was effective in improving process outcomes (e.g.,  
16 hypertension and diabetes screening) and health outcomes (e.g., hypertension and diabetes control), and  
17 achieving treatment concordance with doctors.[34, 16] Krishnan et al. (2019) conducted a study on a  
18 community-based hypertension management program of blood pressure monitoring and lifestyle  
19 counselling intervention undertaken by female community health volunteers (FCHVs) in Nepal, and  
20 assessed the intervention to be highly cost-effective.[35] However, there are several barriers to team-based  
21 care with task sharing, including staff attrition and turnover, retention of training, patient perception and  
22 acceptance toward non-physician health workers, lack of delegation of work by physicians, legislation and  
23 policy etc. [36]

24  
25  
26  
27  
28  
29  
30  
31  
32  
33  
34  
35  
36 In Bangladesh, of the four entities (i.e., the government, for-profit private sector, non-profit  
37 nongovernmental organization, and donor agencies) involved in the primary healthcare provision, the  
38 government plays the leading role, mainly in rural areas. There are six tiers of public healthcare  
39 infrastructure: national, divisional, district, upazila (sub-district), union, and ward levels. To tackle NCDs,  
40 the government of Bangladesh introduced 'NCD Corners' initiative in 2012 dedicated to providing  
41 prevention and care services for common NCDs and related conditions. The government has plans to  
42 expand 'NCD corners' at the upazila level, and the upazila primary care setting is well-positioned to bridge  
43 the link the health care providers down to the union, ward (and community) levels by harnessing  
44 community support and delegating suitable activities under task-sharing principles.[16, 37, 38] This will  
45 enhance healthcare access among disadvantaged populations and mitigate health disparities. Further, in  
46 Bangladesh, according to the 2016 Household Income Expenditure Survey and 2014 Health and Morbidity  
47 Status Survey, one in three patients received treatment from a pharmacy or medical shop, while about one  
48 in five received treatment from public health providers.[39, 40] This emphasizes the need for partnerships  
49 with various types of public-private health providers.  
50  
51  
52  
53  
54  
55  
56  
57  
58  
59  
60

1  
2  
3 The models of care introduced in the Bangladesh national hypertension guidelines and NCD  
4 operational plan are encouraging; however, there are capacity challenges to the scaling-up of NCD care in  
5 Bangladesh.[41, 42] The fiscal year 2021 budget allocation to the health sector stands just above 5%,  
6 which is less than 1% of GDP. Further, less than 5% of public sector funding for health covers NCDs,  
7 despite NCDs being responsible for almost two-thirds (63% in 2016) of disability-adjusted life years  
8 (DALYs) in Bangladesh.[16] The per capita NCD allocation is only USD 0.08.[16] There is a need for  
9 better coordination of non-state stakeholders in NCD control with the public sector with a stronger focus of  
10 the public sector on NCD prevention and health promotion.[16] The health sector in Bangladesh is  
11 financed 93% from domestic sources (74% out-of-pocket, 17% government health expenditure, and 3%  
12 other private sources) and 7% from external health expenditures. Domestic general government health  
13 expenditure per capita is only USD 7 (0.4% of GDP per capita).[43] Due to insufficient public sector  
14 funding, out-of-pocket expenditure for NCD care is large in Bangladesh, contributing to the  
15 impoverishment of patients and their families. Moreover, a recent policy review by Biswas et al (2017)  
16 highlights the lack of proper planning, implementation, and monitoring of NCD health initiatives.[44]  
17 However, the Bangladesh Copenhagen Project assessed the benefits of managing hypertension through  
18 targeted investment and reported a high level of return on investment (BDT 17 benefit for every BDT  
19 spent).[31]

20  
21  
22 This report has several limitations. Due to lack of data at a local level, the cost projections rely on  
23 assumptions regarding population coverage, risk factor prevalence, primary care attendance rate, and  
24 frequency of patient visits by CVD risk, which were assumed to be uniform for the four sub-districts and  
25 across age or sex groups. Similarly, unit costs of supplies, wages, and provider time allocations were  
26 assumed to be the same across sub-districts. Since the examined sub-districts are adjacent to each other,  
27 these unit costs may not be considerably different. While we used average medicine prices, they may vary  
28 in different sub-districts depending on the procurement arrangement and sources. However, in Bangladesh,  
29 the price variations are minimal or low in the public health facilities, given the medicines are procured  
30 mainly from EDCL and/or CMSD.[19, 20] The strength of the study lies in its ability to disaggregate costs  
31 by function, identifying areas for efficiency improvements, such as task-sharing and bridging program  
32 delivery from the upazila level to more localized community facilities.

33  
34  
35 In 2018, the Government of Bangladesh introduced a multisectoral action plan for NCD  
36 prevention and control, which emphasizes NCD risk factors including tobacco use, unhealthy diet, physical  
37 inactivity, and harmful use of alcohol.[42] This study can inform approaches to scaling up this action plan  
38 nationally, with the goal of increasing population outreach for CVD prevention at the primary care level.

Using the costs reported in this study for future cost-effectiveness analyses can further support evidence-based decision making for CVD prevention programs in Bangladesh.

## 5. Conclusion

Expanding the HEARTS hypertension management and CVD prevention program to provide services to the entire eligible population in the catchment area may face constraints in physician capacity. A task-sharing model involving shifting of select tasks from doctors to nurses and local community health workers would be essential for the eventual scale-up of primary care services to prevent CVD in Bangladesh.

### Disclaimer

The findings and conclusions of this report are those of authors only and do not necessarily represent the official position of the Centers for Disease Control and Prevention.

### Author Contribution

MJH and MSH conceptualized the study, led the formal analysis, implemented the methodology and the excel-based costing tool, and wrote the draft manuscript. DK, SRC, MRB, AEM contributed to the study concept, analytical aspects, manuscript write-up and critical review. RT and SJ contributed to data collection and critical review of the manuscript. MJH, MSH, SRC, RT, SJ, and MRB contributed to data collection. All authors provided critical feedback and helped shape the research, analysis, and manuscript.

### Ethics Approval

Ethics approval was not required because this research neither involved human or animal participation nor required consent from human participants.

### Conflict of Interest

The authors declare non conflict of interest

### Data Statement

The study used publicly available secondary data sources. No proprietary data were used for the analysis.

### Funding

This analysis was conducted on behalf of Resolve to Save Lives, an initiative of Vital Strategies. Resolve to Save Lives is funded by grants from Bloomberg Philanthropies; the Bill and Melinda Gates Foundation; and Gates Philanthropy Partners, which is funded with support from the Chan Zuckerberg Foundation.

## References

1. World Health Organization. 2020. Improving hypertension control in 3 million people: country experiences of programme development and implementation. Geneva: World Health Organization; 2020.
2. World Health Organization. 2013a. A global brief on hypertension: silent killer, global public health crisis: World Health Day 2013. No. WHO/DCO/WHD/2013.2. World Health Organization, 2013.
3. GBD 2013 Risk Factors Collaborators. Global, regional, and national comparative risk assessment of 79 behavioural, environmental and occupational, and metabolic risks or clusters of risks in 188 countries, 1990-2013: a systematic analysis for the Global Burden of Disease Study 2013. *Lancet*. 2015;386:2287-2323.
4. Rapsomaniki E, Timmis A, George J, Pujades-Rodriguez M, Shah AD, Denaxas S, et al. Blood pressure and incidence of twelve cardiovascular diseases: lifetime risks, healthy life-years lost, and age-specific associations in 1·25 million people. *Lancet*. 2014;383:1899–911.
5. Vaes B, Beke E, Truyers C, Elli S, Buntinx F, Verbakel JY, et al. The correlation between blood pressure and kidney function decline in older people: a registry-based cohort study. *BMJ Open*. 2015;5:e007571.
6. Tzourio C. 2007. Hypertension, cognitive decline, and dementia: an epidemiological perspective. *Dialog Clin Neur*. 2007;9:61.
7. Bloch MJ, FASH F, Basile FJ. Cardiovascular risks of hypertension. *UpToDate*. Jan. 2018.
8. World Health Organization. 2012. Sixty-Fifth World Health Assembly Resolutions, Decisions, Annexes. 2012 May 21–26; Available from: <http://www.who.int/mediacentre/events/2012/wha65/en/>. WHA65/2012/REC/1.
9. World Health Organization. 2013b. Global Action Plan for the Prevention and Control of Noncommunicable Diseases: 2013–2020. [online] Geneva, Switzerland: World Health Organization; 2013. Available from: [http://apps.who.int/iris/bitstream/handle/10665/94384/1/9789241506236\\_eng.pdf](http://apps.who.int/iris/bitstream/handle/10665/94384/1/9789241506236_eng.pdf)
10. World Health Organization. 2014. Global status report on noncommunicable diseases 2014 (No. WHO/NMH/NVI/15.1). World Health Organization.
11. World Health Organization. 2020a. Thirteenth General Programme of Work (GPW13): methods for impact measurement. Geneva: World Health Organization; 2020. Available from: <file:///C:/Research/Bangladesh%20HEARTS%20Costing%20tool/gpw13-methodology-nov9-online-version.pdf>
12. United Nations. (2015). Transforming our world: The 2030 agenda for sustainable development. General Assembly 70 session.
13. Riaz BK, Islam MZ, Islam ANMS, Zaman MM, Hossain MA, Rahman MM, Khanam F, K, Amin KMB, Noor IN. Risk factors for non-communicable diseases in Bangladesh: findings of the population-based cross-sectional national survey 2018. *BMJ Open* 2020;10:e041334. doi:10.1136/bmjopen-2020-041334

14. Chowdhury, M. Z. I., Rahman, M., Akter, T., Akhter, T., Ahmed, A., Shovon, M. A., ... & Turin, T. C. (2020). Hypertension prevalence and its trend in Bangladesh: evidence from a systematic review and meta-analysis. *Clinical Hypertension*, 26, 1-19.
15. World Health Organization. 2018. Country Office for Bangladesh. National STEPS survey for non-communicable diseases risk factors in Bangladesh 2018. World Health Organization. Country Office for Bangladesh. <https://apps.who.int/iris/handle/10665/332886>.
16. The World Bank. (2019). Hypertension and Type-2 Diabetes in Bangladesh: Continuum of Care Assessment and Opportunities for Action. Washington DC: World Bank.
17. World Health Organization. (2020b). Hearts: technical package for cardiovascular disease management in primary health care.
18. World Health Organization. 2016. HEARTS: Technical Package for Cardiovascular Disease Management in Primary Health Care. Geneva, Switzerland: World Health Organization; 2016. Available from: <https://apps.who.int/iris/bitstream/handle/10665/252661/9789241511377-en...>
19. World Health Organization. 2014. Medicines in Health Care Delivery Bangladesh: Situational Analysis: 13 – 25 September 2014 Report prepared using the WHO/SEARO workbook tool for undertaking a situational analysis of medicines in health care delivery in low and middle income countries. World Health Organization, Regional Office for South East Asia, New Delhi, India.
20. Kasonde, L., Tordrup, D., Naheed, A., Zeng, W., Ahmed, S., & Babar, Z. U. D. (2019). Evaluating medicine prices, availability and affordability in Bangladesh using World Health Organisation and Health Action International methodology. *BMC health services research*, 19, 1-12.
21. HEARTS technical package for cardiovascular disease management in primary health care: risk based CVD management. Geneva: World Health Organization; 2020. Licence: CC BY-NC-SA 3.0 IGO
22. World Health Organization. (2020). Diagnosis and management of type 2 diabetes (HEARTS-D). WHO/UCN/NCD/20.1. Licence: CC BY-NC-SA 3.0 IGO. World Health Organization: Geneva, Switzerland.
23. Brown, R. E., Welsh, P., & Logue, J. (2020). Systematic review of clinical guidelines for lipid lowering in the secondary prevention of cardiovascular disease events. *Open heart*, 7(2), e001396.
24. Husain, M. J., Allaire, B. T., program: An application Hutchinson, B., Ketgudee, L., Srisuthisak, S., Yueayai, K., ... & Kostova, D. (2020). Assessing costs of a hypertension management of the HEARTS costing tool in a program planning workshop in Thailand. *The Journal of Clinical Hypertension*, 22(1), 111-117.
25. Glasgow, Russell E., Seth Emont, and Doriane C. Miller. "Assessing delivery of the five 'As' for patient-centered counseling." *Health Promotion International* 21.3 (2006): 245-255.
26. Whitlock, E. P., Orleans, C. T., Pender, N., & Allan, J. (2002). Evaluating primary care behavioral counseling interventions: an evidence-based approach. *American journal of preventive medicine*, 22(4), 267-284.
27. Islam, J. Y., Zaman, M. M., Moniruzzaman, M., Shakoor, S. A., & Hossain, A. E. (2020). Estimation of total cardiovascular risk using the 2019 WHO CVD prediction charts and comparison of population-level costs based on alternative drug therapy guidelines: a population-based study of adults in Bangladesh. *BMJ open*, 10(7), e035842



- 1
  - 2
  - 3
  - 4
  - 5
  - 6
  - 7
  - 8
  - 9
  - 10
  - 11
  - 12
  - 13
  - 14
  - 15
  - 16
  - 17
  - 18
  - 19
  - 20
  - 21
  - 22
  - 23
  - 24
  - 25
  - 26
  - 27
  - 28
  - 29
  - 30
  - 31
  - 32
  - 33
  - 34
  - 35
  - 36
  - 37
  - 38
  - 39
  - 40
  - 41
  - 42
  - 43
  - 44
  - 45
  - 46
  - 47
  - 48
  - 49
  - 50
  - 51
  - 52
  - 53
  - 54
  - 55
  - 56
  - 57
  - 58
  - 59
  - 60
28. Hasan, M. J. (2016). Pattern of drugs prescribed for treatment of hypertensive patients: Bangladesh. *African Journal of Pharmacy and Pharmacology*, 10(25), 521-525.
29. Chowdhury, A., Niloy, S. E. N., & Banik, S. (2017). Prescribing pattern of antidiabetic drugs in type 2 diabetic patients of Noakhali city in Bangladesh. *Marmara Pharmaceutical Journal*, 21(4), 1010-1014.
30. Elnaem, M. H., Mohamed, M. H. N., Huri, H. Z., & Shah, A. S. M. (2019). Effectiveness and prescription pattern of lipid-lowering therapy and its associated factors among patients with type 2 diabetes mellitus in Malaysian primary care settings. *Therapeutics and Clinical Risk Management*, 15, 137.
31. Nugent, R., Brower, E., Cravioto, A., & Koehlmoos, T. (2017). A cost-benefit analysis of a National Hypertension Treatment Program in Bangladesh. *Preventive medicine*, 105, S56-S61.
32. World Health Organization. 2011. *Scaling up action against non-communicable diseases: how much will it cost?* ISBN 978 92 4 150231 3
33. Haque R (2016). *Costs and Benefits of addressing Diabetes and Smokeless Tobacco Consumption via Community Clinics*. Bangladesh Priorities, Copenhagen Consensus Center, 2016. License: Creative Commons Attribution CC BY 4.0.
34. Joshi R, Alim M, Kengne AP, Jan S, Maulik PK, Peiris D, et al. Task shifting for non-communicable disease management in low and middle income countries--a systematic review. *PloS one*. 2014;9(8):e103754. Epub 2014/08/15. doi: 10.1371/journal.pone.0103754.
35. Krishnan, A., Finkelstein, E. A., Kallestrup, P., Karki, A., Olsen, M. H., & Neupane, D. (2019). Cost-Effectiveness and budget impact of the community-based management of hypertension in Nepal study (COBIN): a retrospective analysis. *The Lancet Global Health*, 7(10), e1367-e1374.
36. HEARTS Technical package for cardiovascular disease management in primary health care: team-based care. Geneva: World Health Organization; 2018 (WHO/NMH/ NVI/18.4). Licence: CC BY-NC-SA 3.0 IGO.
37. Rawal, L. B., Kanda, K., Biswas, T., Tanim, M. I., Poudel, P., Renzaho, A. M., ... & Ahmed, S. M. (2019). Non-communicable disease (NCD) corners in public sector health facilities in Bangladesh: a qualitative study assessing challenges and opportunities for improving NCD services at the primary healthcare level. *BMJ open*, 9(10), e029562.
38. Directorate General of Health Services (2020). *Health Bulletin 2019*. Management Information System, Director General of Health Services, Ministry of Health and Family Welfare, Government of the People's Republic of Bangladesh.
39. Bangladesh Bureau of Statistics (BBS). 2017. *Preliminary report on Household Income and Expenditure Survey 2016*. Statistics and Informatics Division (SID), Ministry of Planning. Government of the People's Republic of Bangladesh.
40. Bangladesh Bureau of Statistics (BBS). 2015. *Report on Health and Morbidity Status Survey 2014*. Statistics and Informatics Division (SID), Ministry of Planning. Government of the People's Republic of Bangladesh.
41. World Health Organization. 2013. *National guidelines for management of hypertension in Bangladesh*.

- 1  
2  
3 42. Director General of Health Services. DGHS. 2018. Multi-sectoral action plan for prevention and  
4 control of non-communicable diseases 2018-2025. (2018). Dhaka: Non-communicable Disease  
5 Control Programme, Directorate General of Health Services.  
6  
7 43. WHO Global Health Expenditure Database (<https://apps.who.int/nha/database/ViewData/Indicators/en>).  
8  
9 44. Biswas, T., Pervin, S., Tanim, M.I.A. et al. Bangladesh policy on prevention and control of non-  
10 communicable diseases: a policy analysis. BMC Public Health 17, 582 (2017).  
11 <https://doi.org/10.1186/s12889-017-4494-2>.  
12  
13  
14  
15  
16  
17  
18  
19  
20  
21  
22  
23  
24  
25  
26  
27  
28  
29  
30  
31  
32  
33  
34  
35  
36  
37  
38  
39  
40  
41  
42  
43  
44  
45  
46  
47  
48  
49  
50  
51  
52  
53  
54  
55  
56  
57  
58  
59  
60

For peer review only



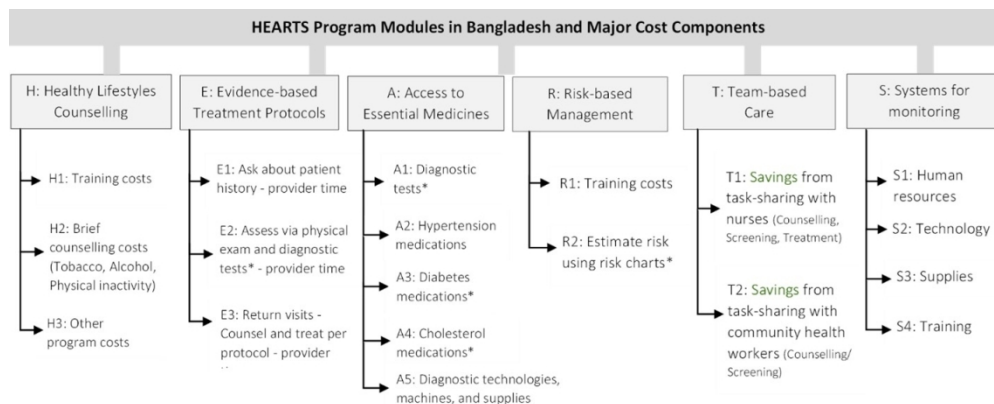

Cost components of the HEARTS program in Bangladesh

165x67mm (220 x 220 DPI)

1  
2  
3  
4  
5  
6  
7  
8  
9  
10  
11  
12  
13  
14  
15  
16  
17  
18  
19  
20  
21  
22  
23  
24  
25  
26  
27  
28  
29  
30  
31  
32  
33  
34  
35  
36  
37  
38  
39  
40  
41  
42  
43  
44  
45  
46  
47  
48  
49  
50  
51  
52  
53  
54  
55  
56  
57  
58  
59  
60



Distribution of annual cost by HEARTS components

495x240mm (130 x 130 DPI)

1  
2  
3  
4  
5  
6  
7  
8  
9  
10  
11  
12  
13  
14  
15  
16  
17  
18  
19  
20  
21  
22  
23  
24  
25  
26  
27  
28  
29  
30  
31  
32  
33  
34  
35  
36  
37  
38  
39  
40  
41  
42  
43  
44  
45  
46  
47  
48  
49  
50  
51  
52  
53  
54  
55  
56  
57  
58  
59  
60

## Bangladesh

# Hypertension Management Protocol

for Primary Health Care Setting\*



Measure blood pressure of **all adults ≥ 18 years\*\***

If SBP is 140-159 mmHg or DBP 90-99 mmHg<sup>a</sup> → Advice for lifestyle modification  
Review BP after 2 weeks. If SBP is still 140-159 mmHg or DBP 90-99 mmHg, **start drug treatment as below\*\*\***

**Step 1** Start amlodipine 5 mg<sup>b</sup> once daily.

**Step 2** Review after 1 month. If treatment target not met,<sup>c</sup> amlodipine 5 mg + losartan<sup>d</sup> 50 mg once daily.

**Step 3** Review after 1 month. If treatment target not met,<sup>c</sup> amlodipine 5 mg + losartan<sup>d</sup> 50 mg + hydrochlorothiazide 12.5 mg once daily<sup>e</sup>.

**Step 4** Review after 1 month. If treatment target not met,<sup>c</sup> refer to a specialist.

**Treatment Target Based on Levels of Blood Pressure**

| Most Patients                                                                         | ≤140/90 mmHg |
|---------------------------------------------------------------------------------------|--------------|
| Having Comorbidity (diabetes, ischemic heart disease, stroke, chronic kidney disease) | ≤130/80 mmHg |
| High CVD Risk > 30% (as per CVD risk prediction chart)                                | ≤130/80 mmHg |

**For Women of Childbearing Age Who May Become Pregnant**

Step 1: Start amlodipine 5 mg<sup>b</sup> once daily.  
Step 2: Review after 1 month. If treatment target not met,<sup>c</sup> amlodipine 10 mg once daily.  
Step 3: Review after 1 month. If treatment target not met,<sup>c</sup> refer to specialist.

**⚠ DO NOT PRESCRIBE losartan or any ACE inhibitor or ARB to women who may become pregnant.**

**Advice for lifestyle modification**



Avoid alcohol and tobacco, including secondhand smoke



Exercise 2.5 hr/week



Eat a low salt diet (under 1 tsp/day)



Eat a heart-healthy diet

If overweight, lose weight. Eat at least 5 servings of vegetables/fruit per day. Use healthy oils, such as sesame (til), olive, safflower, sunflower. Eat nuts, peas, whole grains and foods rich in potassium like spinach, watermelon, yogurt and banana.

Limit red meat to once or twice per week at most. Eat fish or other food rich in omega 3 fatty acids at least twice per week. Avoid added sugar from cakes, cookies, sweets, fizzy drinks.






a. For patients with SBP ≥160 mmHg or DBP ≥ 100 mmHg, start immediate treatment at step 2 (amlodipine 5 mg + losartan 50 mg).  
 b. Consider amlodipine 2.5 mg as a starting dose for the elderly or patients with low body weight.  
 c. Check that the patient has been taking drugs regularly and correctly.  
 d. Before initiating and several weeks after starting losartan, check serum creatinine and serum potassium. Avoid losartan for women of childbearing age who may become pregnant.  
 e. Consider the option of increasing losartan to 100 mg before proceeding to step 3, and continuing the dose of losartan 100 mg for step 3.

\* Adapted from National Protocol for Management of Diabetes and Hypertension, NCD programme, DGHS MOHFW 2018-19.

\*\* For patients aged ≥ 40 years, decision to treat high blood pressure may be taken based on total cardiovascular disease (CVD) risk estimation.

\*\*\* This protocol should not be used for pregnant patients. If patient is pregnant, refer to a specialist.

533x753mm (173 x 173 DPI)
